# Supplementary material for: Utilization of the through-space effect to design donor–acceptor systems of pyrrole, indole, isoindole, azulene and aniline
Source: Royal Society of Chemistry journal article supplement (doi:10.1039/d3cp03393g), 2023-12-18
Supplement: d3cp03393g1.pdf [file d3cp03393g1.pdf]

## Utilization of Through-Space Effect to Design Donor-Acceptor Systems of Pyrrole, Indole, Isoindole, Azulene and Aniline

Puthannur K. Anjalikrishna<sup>ab</sup> and Cherumuttathu H. Suresh<sup>ab\*</sup>

<sup>a</sup>Chemical Sciences and Technology Division, CSIR-National Institute for Interdisciplinary Science and Technology, Thiruvananthapuram, 695019, India.

<sup>b</sup>Academy of Scientific and Innovative Research (AcSIR), Ghaziabad, 201002, India.

Email: sureshch@gmail.com; sureshch@niist.res.in

| Table of contents |                                                                                                                                      | Page no. |
|-------------------|--------------------------------------------------------------------------------------------------------------------------------------|----------|
| Table S1          | Benchmark study                                                                                                                      | S3       |
| Figure S1         | The direction of TSE and the variation in $V_m$ values in each pyrrole ring in $C_3N_{1'}$ and $C_3C_{2'}$ connected polypyrroles.   | S4       |
| Figure S2         | Schematic representation of electronic distributions observed in frontier molecular orbitals of selected set of systems              | S5       |
| Figure S3         | The direction of PoED and the variation in $V_m$ values in each pyrrole unit in ${}^5P_{C_3N_{1'}}$                                  | S6       |
| Figure S4         | Illustration of the directional nature of TSE in $(P_{C_3N_{1'}})_n$ clusters                                                        | S7       |
| Figure S5         | Illustration of the directional nature of TSE in $(P_{C_3C_{2'}})_n$ clusters.                                                       | S8       |
| Figure S6         | Atomic polar tensor charges demonstrating the donor-acceptor feature of ${}^n P_{C_3N_{1'}}$ systems                                 | S9       |
| Figure S7         | The MESP mapped on to 0.01 au electron density isosurface for phenyldipyrrole ( <b>PhDP</b> ) systems                                | S9       |
| Figure S8         | The MESP mapped on to 0.01 au electron density isosurface for intramolecularly coupled octapyrrolynaphthalene ( <b>OPN</b> ) systems | S10      |
| Figure S9         | The MESP mapped on to 0.01 au electron density isosurface for intramolecularly coupled decapyrrylcorannulene ( <b>DPC</b> ) systems  | S11      |
| Figure S10        | Complementary electrostatic interactions in the dimers of ${}^n P_{C_3N_{1'}}$ .                                                     | S12      |
| Figure S11        | Representative examples for complementary complexes.                                                                                 | S13      |
| Figure S12        | Numbering in indole, isoindole, azulene and aniline systems adopted in the study                                                     | S13      |
| Figure S13        | The direction of TSE and the variation in $V_m$ values in 3,1'-polyindoles ( ${}^n I_{C_3N_{1'}}$ )                                  | S14      |
| Figure S14        | The direction of TSE and the variation in $V_m$ values in 3,2'-polyindoles ( ${}^n I_{C_3C_{2'}}$ )                                  | S15      |
| Figure S15        | The direction of TSE and the variation in $V_m$ values in 6,1'-polyindoles ( ${}^n I_{C_6N_{1'}}$ )                                  | S16      |
| Figure S16        | The direction of TSE and the variation in $V_m$ values in polyisoindoles ( ${}^6 i I_{C_5N_{1'}}$ )                                  | S17      |

|            |                                                                                                                                                                        |     |
|------------|------------------------------------------------------------------------------------------------------------------------------------------------------------------------|-----|
| Figure S17 | The direction of TSE and the variation in $V_m$ values in polyazulenes ( $^n\mathbf{Az}_{C_{1C6}'}$ ).                                                                 | S18 |
| Figure S18 | The direction of TSE and the variation in $V_m$ values in polyanilines ( $^n\mathbf{An}_{C_{4C2}'}$ )                                                                  | S19 |
| Figure S19 | The direction of TSE in clusters of $I_{C_{3N1}'}$ , $I_{C_{3C2}'}$ , $I_{C_{6N1}'}$ , $iI_{C_{5N1}'}$ , $\mathbf{An}_{C_{4C2}'}$ and $\mathbf{Az}_{C_{1C6}'}$ systems | S20 |
| Table S2   | The SCF energy, dipole moment, HOMO energy, LUMO energy and HOMO-LUMO gap (HLG) of all the systems                                                                     | S21 |
| Figure S20 | NMR analysis                                                                                                                                                           | S23 |
| Figure S21 | Simulated absorption spectra of the molecules                                                                                                                          | S29 |
| Figure S22 | The difference in total density computed for the ground and excited states of 1- <i>PhP</i> and <i>HPB</i> <sub>N1</sub> systems plotted at iso-contour value 0.001 au | S37 |
| Table S3   | Cartesian coordinates of all the geometries                                                                                                                            | S37 |

**Table S1.** Comparison  $V_m$  values corresponding to each ring in pyrrole and its C<sub>3</sub>-N<sub>1'</sub> connected polyrrroles using different DFT methods.

| method              | system                                                       | $V_m$ in kcal/mol |       |       |       |       |       |
|---------------------|--------------------------------------------------------------|-------------------|-------|-------|-------|-------|-------|
|                     |                                                              | ring1             | ring2 | ring3 | ring4 | ring5 | ring6 |
| B3LYP/6-311+g(d,p)  | <b>P</b>                                                     | -25.5             |       |       |       |       |       |
|                     | <sup>2</sup> <b>P</b> <sub>C<sub>3</sub>N<sub>1'</sub></sub> | -17.7             | -28.2 |       |       |       |       |
|                     | <sup>3</sup> <b>P</b> <sub>C<sub>3</sub>N<sub>1'</sub></sub> | -14.1             | -20.9 | -30.1 |       |       |       |
|                     | <sup>4</sup> <b>P</b> <sub>C<sub>3</sub>N<sub>1'</sub></sub> | -12.0             | -17.4 | -22.8 | -31.3 |       |       |
|                     | <sup>5</sup> <b>P</b> <sub>C<sub>3</sub>N<sub>1'</sub></sub> | -10.6             | -15.4 | -19.4 | -24.0 | -32.2 |       |
|                     | <sup>6</sup> <b>P</b> <sub>C<sub>3</sub>N<sub>1'</sub></sub> | -9.8              | -14.1 | -17.5 | -20.5 | -24.9 | -32.9 |
| M06-L/6-311+g(d,p)  | <b>P</b>                                                     | -25.9             |       |       |       |       |       |
|                     | <sup>2</sup> <b>P</b> <sub>C<sub>3</sub>N<sub>1'</sub></sub> | -18.5             | -27.9 |       |       |       |       |
|                     | <sup>3</sup> <b>P</b> <sub>C<sub>3</sub>N<sub>1'</sub></sub> | -15.0             | -20.9 | -29.4 |       |       |       |
|                     | <sup>4</sup> <b>P</b> <sub>C<sub>3</sub>N<sub>1'</sub></sub> | -13.0             | -17.7 | -22.4 | -30.5 |       |       |
|                     | <sup>5</sup> <b>P</b> <sub>C<sub>3</sub>N<sub>1'</sub></sub> | -11.7             | -15.7 | -19.4 | -23.8 | -31.2 |       |
|                     | <sup>6</sup> <b>P</b> <sub>C<sub>3</sub>N<sub>1'</sub></sub> | -10.8             | -14.5 | -17.6 | -20.6 | -24.4 | -31.9 |
| wB97XD/6-311+g(d,p) | <b>P</b>                                                     | -27.5             |       |       |       |       |       |
|                     | <sup>2</sup> <b>P</b> <sub>C<sub>3</sub>N<sub>1'</sub></sub> | -19.4             | -30.4 |       |       |       |       |
|                     | <sup>3</sup> <b>P</b> <sub>C<sub>3</sub>N<sub>1'</sub></sub> | -15.6             | -22.6 | -32.3 |       |       |       |
|                     | <sup>4</sup> <b>P</b> <sub>C<sub>3</sub>N<sub>1'</sub></sub> | -13.3             | -19.0 | -24.7 | -33.7 |       |       |
|                     | <sup>5</sup> <b>P</b> <sub>C<sub>3</sub>N<sub>1'</sub></sub> | -12.0             | -17.0 | -21.1 | -25.8 | -34.6 |       |
|                     | <sup>6</sup> <b>P</b> <sub>C<sub>3</sub>N<sub>1'</sub></sub> | -11.1             | -15.6 | -19.1 | -22.1 | -26.9 | -35.2 |

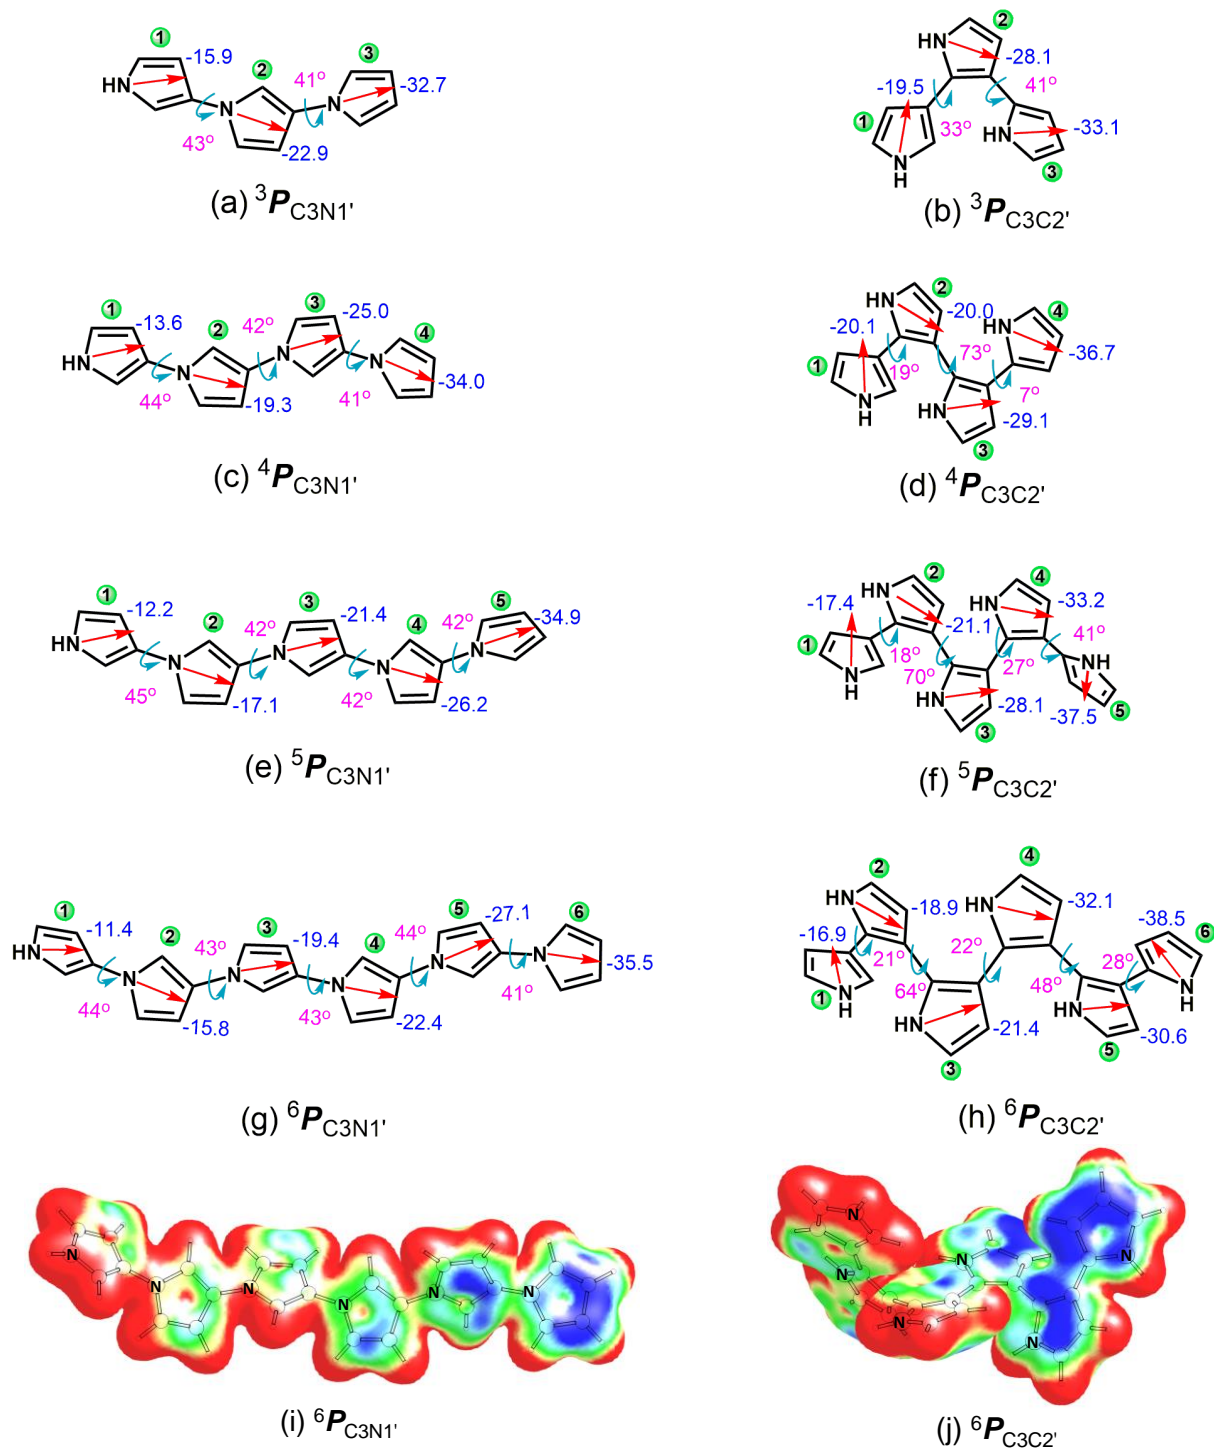

**Figure S1.** The direction of TSE and the variation in  $V_m$  values in each pyrrole ring in (a)  $C_3N_1'$  and (b)  $C_3C_2'$  connected polypyrroles. The  $V_m$  values are given in kcal/mol (blue font) and pyrrole rings from left to right are numbered from 1 to 6, respectively. The dihedral angle at the  $C_3N_1'$  and  $C_3C_2'$  junctions between the adjacent rings in  ${}^n P_{C_3N_1'}$  and  ${}^n P_{C_3C_2'}$  are given in pink font. The is MESP mapped on to 0.01 au electron density isosurface of (c)  ${}^6 P_{C_3N_1'}$  and (d)  ${}^6 P_{C_3C_2'}$  polypyrroles, where coding from blue to red indicates MESP values in the range  $-0.03$  to  $0.03$  au.



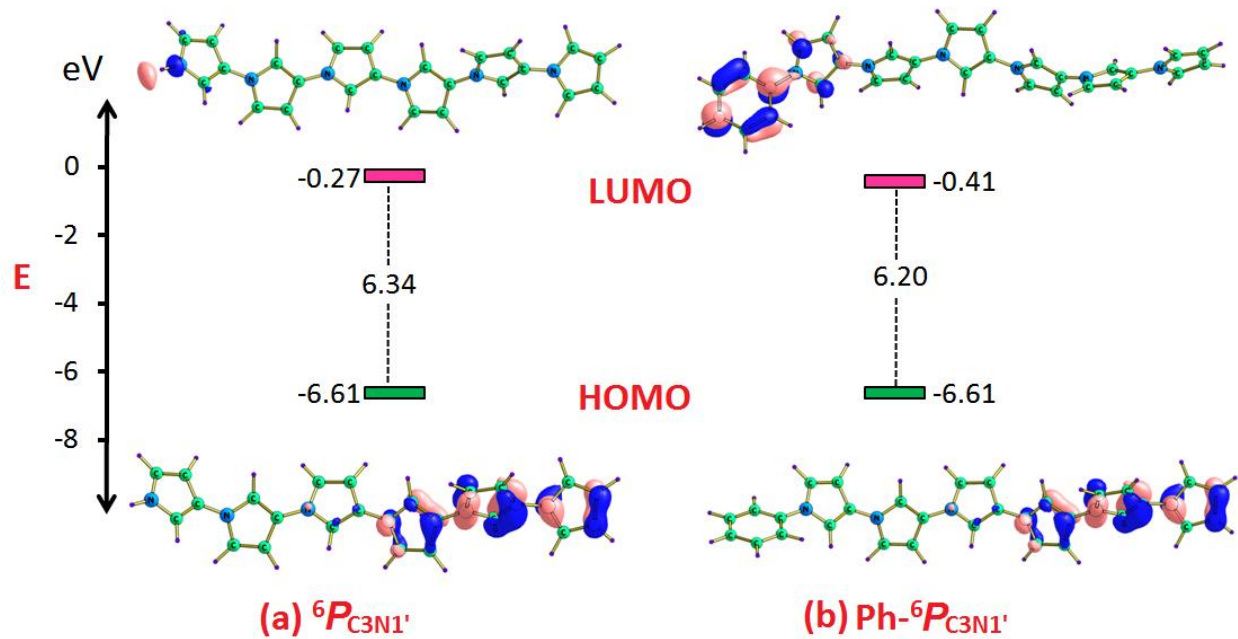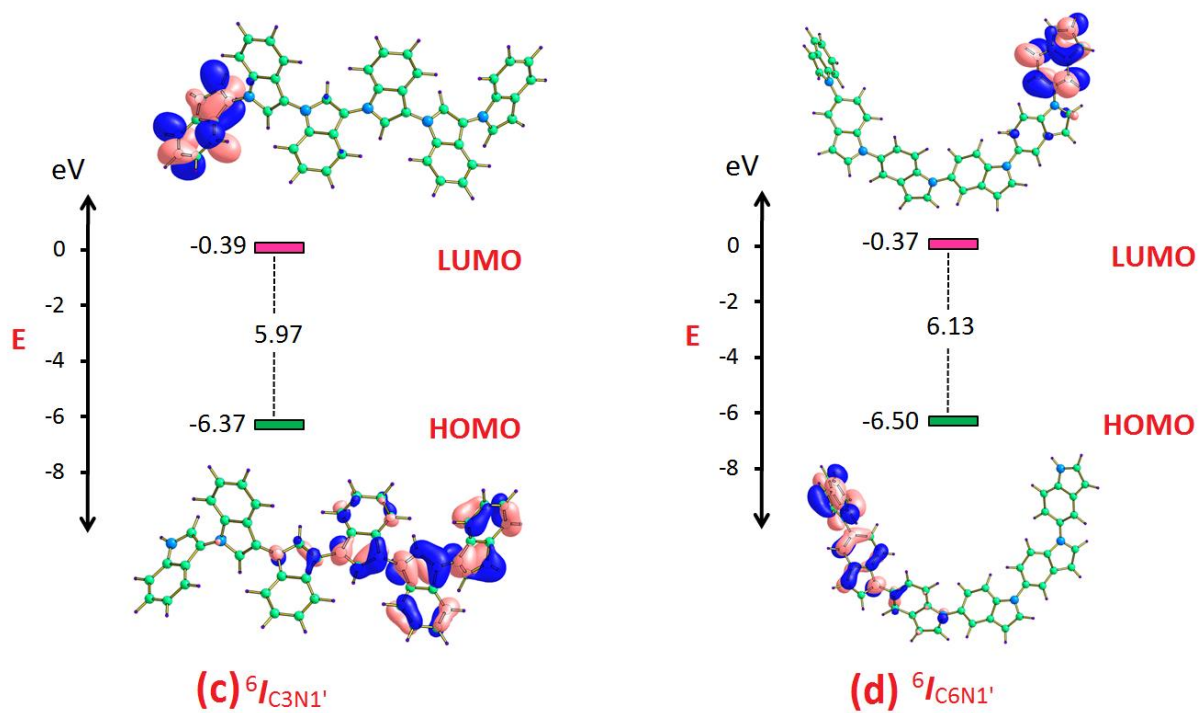

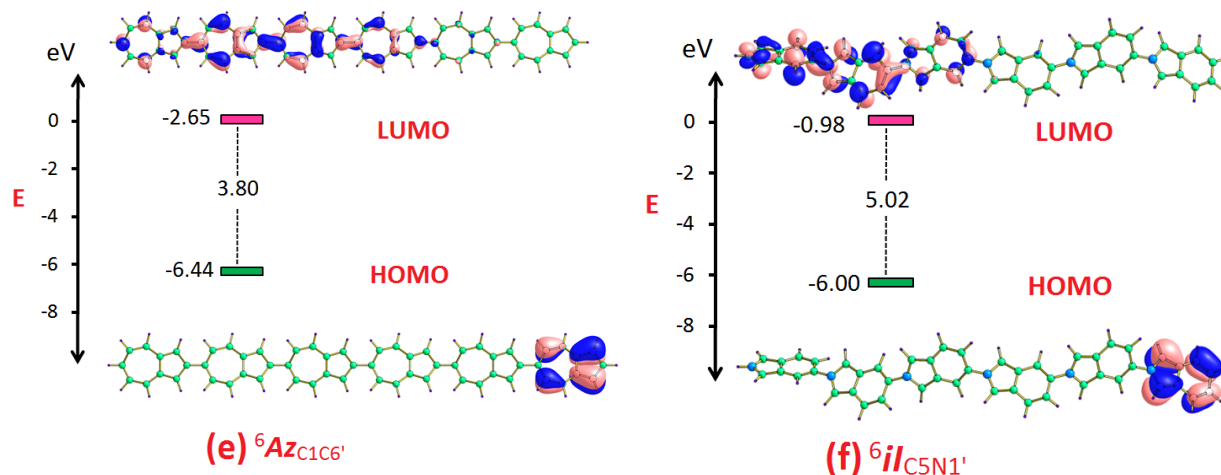

**Figure S2.** Schematic representation of electronic distributions observed in frontier molecular orbitals of representative set of systems. The MO energy and band gap values in eV are also depicted.

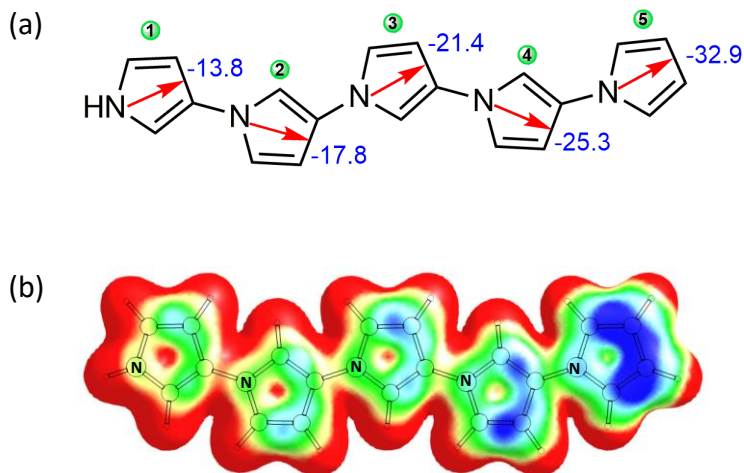

**Figure S3.** (a) The direction of PoED and the variation in  $V_m$  values in each pyrrole unit in  ${}^5P_{C3N1'}$  (b) The MESP mapped on to 0.01 au electron density isosurface of  ${}^5P_{C3N1'}$ , where coding from blue to red indicates MESP values in the range  $-0.03$  to  $0.03$  au.

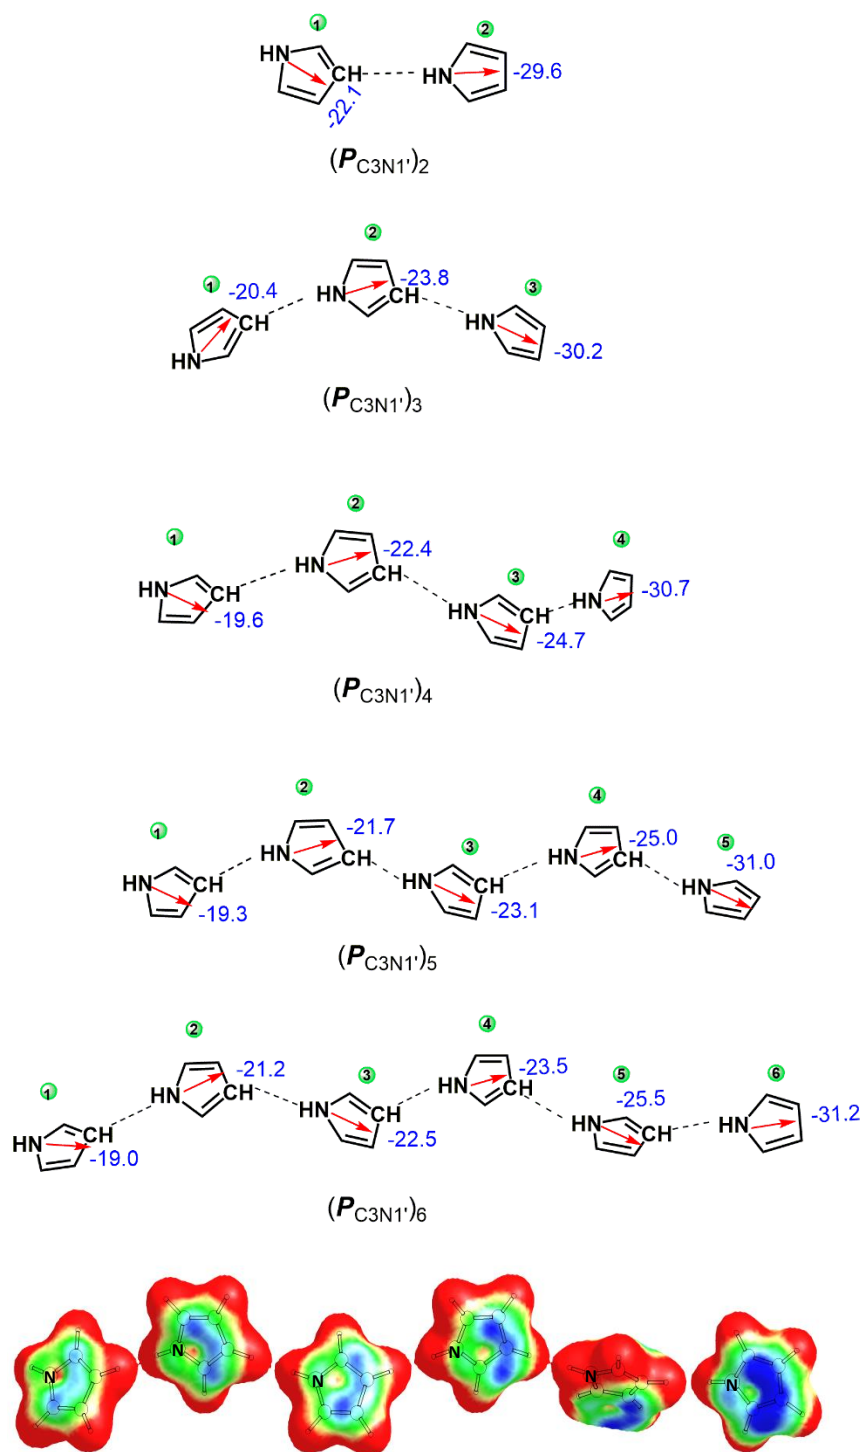

**Figure S4.** Illustration of the directional nature (red arrows) of TSE in  $(P_{C3N1'})_n$  clusters. Pyrroles are numbered from 1 to 6 and  $V_m$  values of each ring is given in kcal/mol. The MESP of  $(P_{C3N1'})_n$  clusters is mapped on to 0.01 au electron density isosurface, where coding from blue to red indicates MESP values in the range  $-0.03$  to  $0.03$  au.

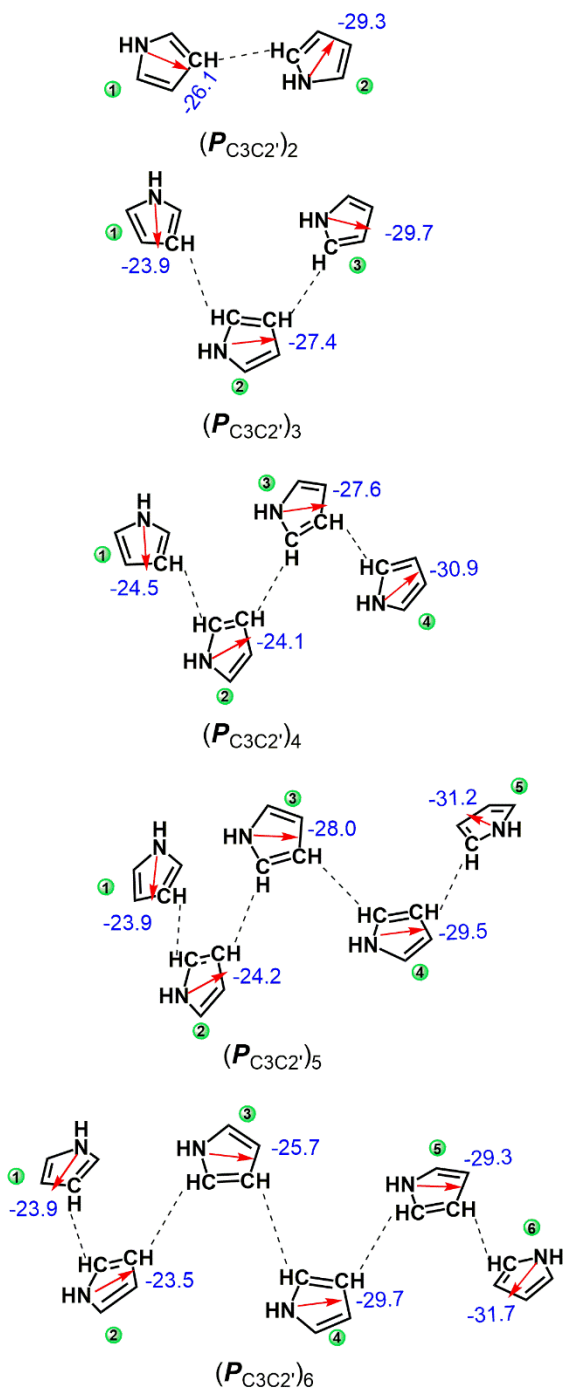

**Figure S5.** Illustration of the directional nature (red arrows) of TSE in  $(P_{C_3C_2'})_n$  clusters. Pyrroles are numbered from 1 to 6 and  $V_m$  values of each ring is given in kcal/mol. The MESP of  $(P_{C_3C_2'})_n$  clusters is mapped on to 0.01 au electron density isosurface, where coding from blue to red indicates MESP values in the range  $-0.03$  to  $0.03$  au.

## Atomic Polar Tensor Charges

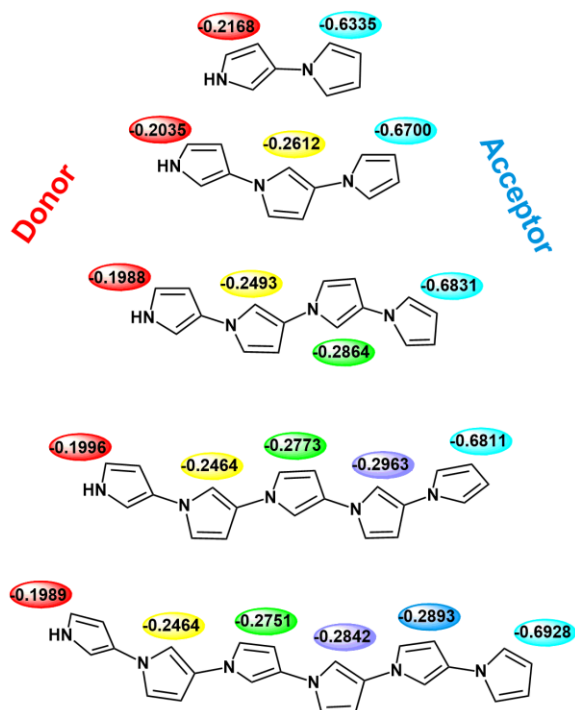

**Figure S6.** Atomic polar tensor (au) charges demonstrating the donor-acceptor feature of  ${}^n\mathbf{P}_{\text{C}_3\text{N}_1}$  systems.

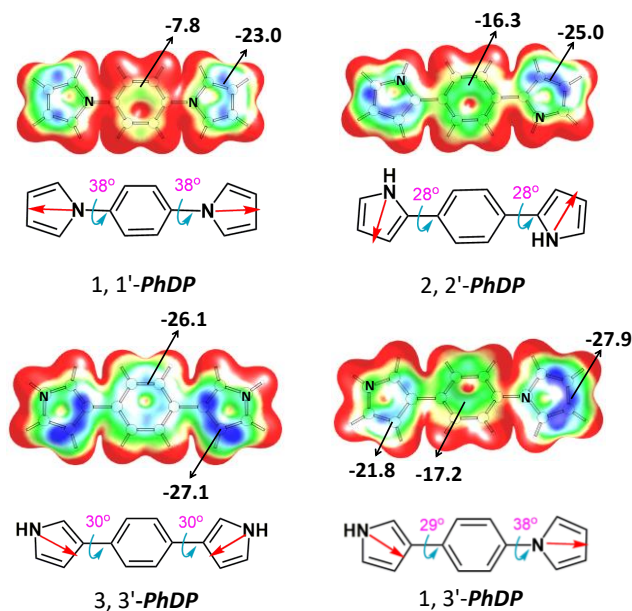

**Figure S7.** The MESP mapped on to 0.01 au electron density isosurface for phenyldipyrrole (*PhDP*) systems. Colour coding from blue to red indicates MESP values in the range  $-0.03$  to  $0.03$  au and the  $V_m$  of each ring are given in kcal/mol. The red arrows represent the direction of TSE.

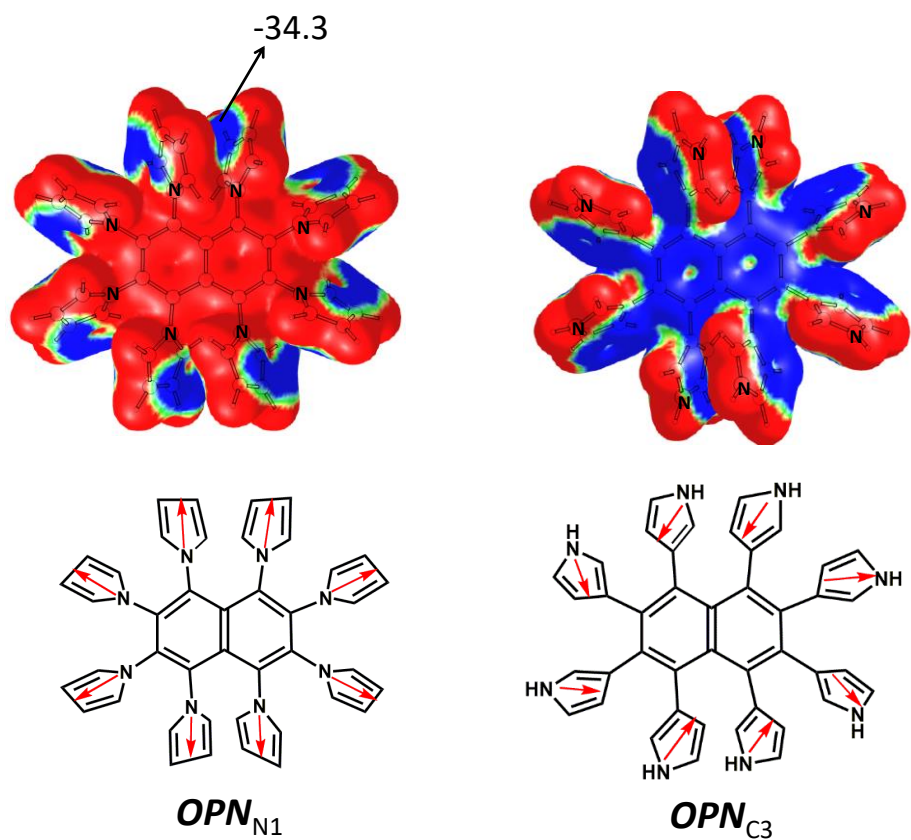

**Figure S8.** The MESP mapped on to 0.01 au electron density isosurface for intra-molecularly coupled octapyrrolynaphthalene (**OPN**) systems. Colour coding from blue to red indicates MESP values in the range  $-0.01$  to  $0.01$  au and the  $V_m$  of each ring are given in kcal/mol. The direction of electron flow is denoted using red arrow.

---

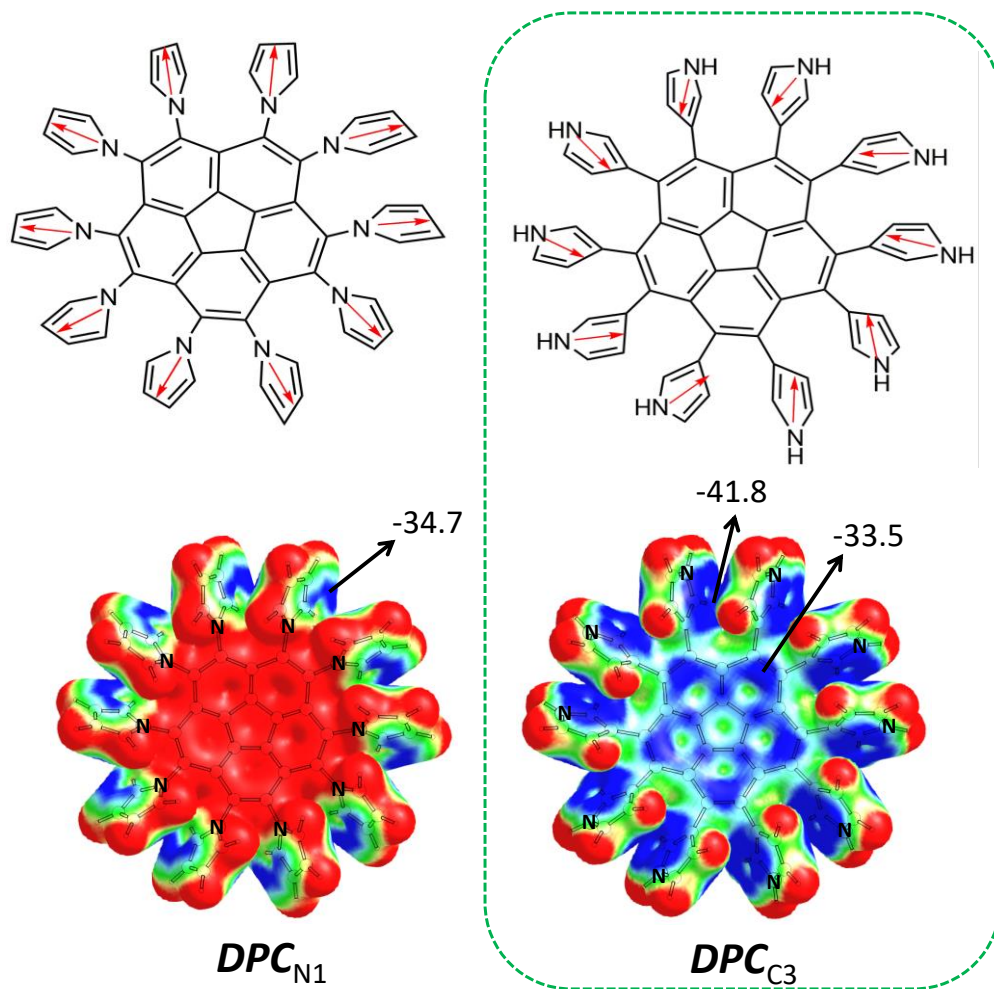

**Figure S9.** The MESP mapped on to 0.01 au electron density isosurface for intra-molecularly coupled decapyrrolylcorannulene (**DPC**) systems. Color coding from blue to red indicates MESP values in the range  $-0.03$  to  $0.03$  au and the  $V_m$  of each ring are given in kcal/mol.



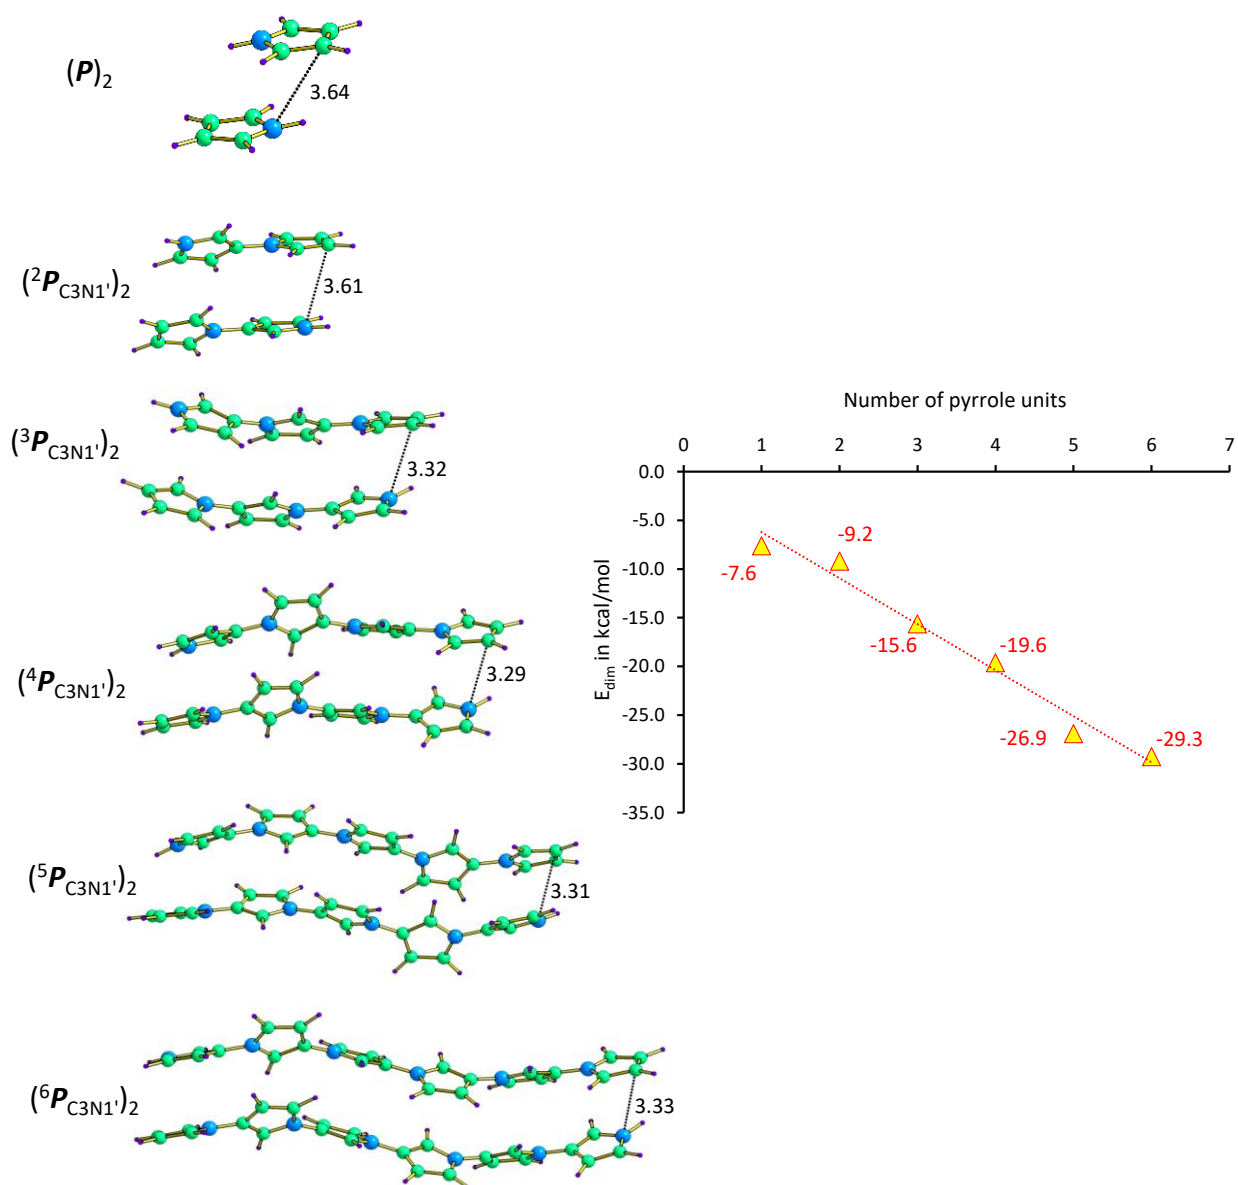

**Figure S10.** Complementary electrostatic interactions in the dimers of  $nP_{C3N1'}$ . The intermolecular distances are given in Å.



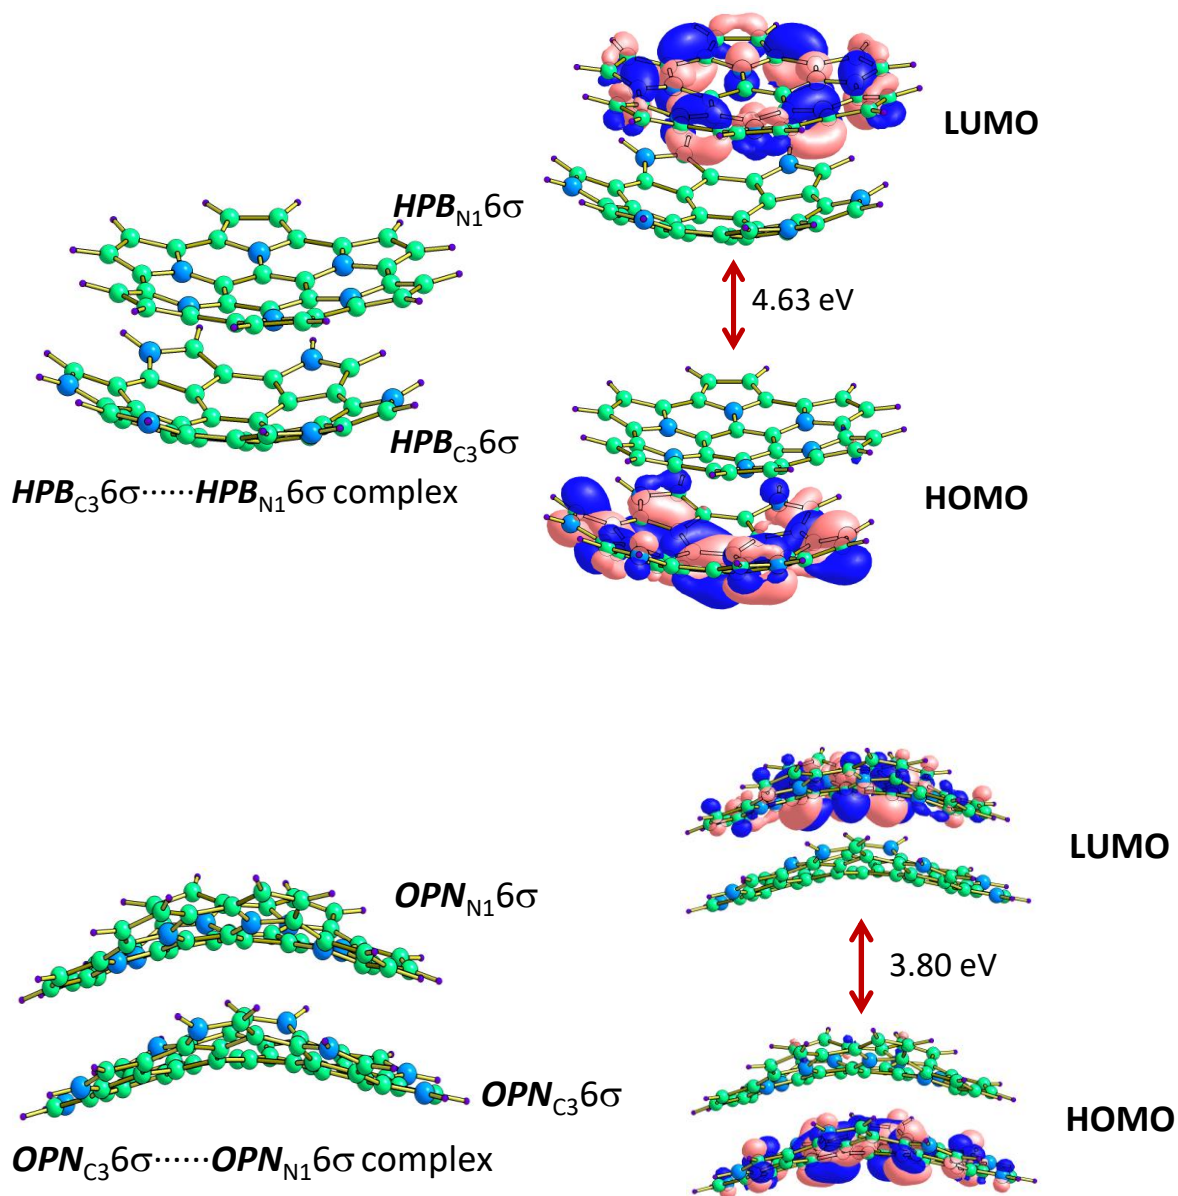

Figure S11. Representative examples for complementary complexes.

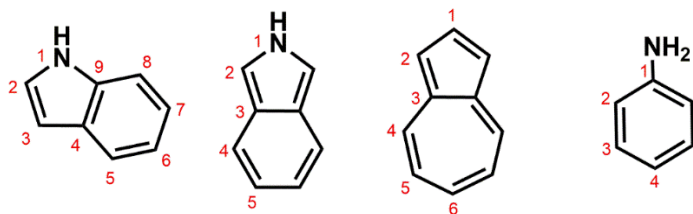

Figure S12. Numbering in indole, isoindole, azulene and aniline systems adopted in the study.

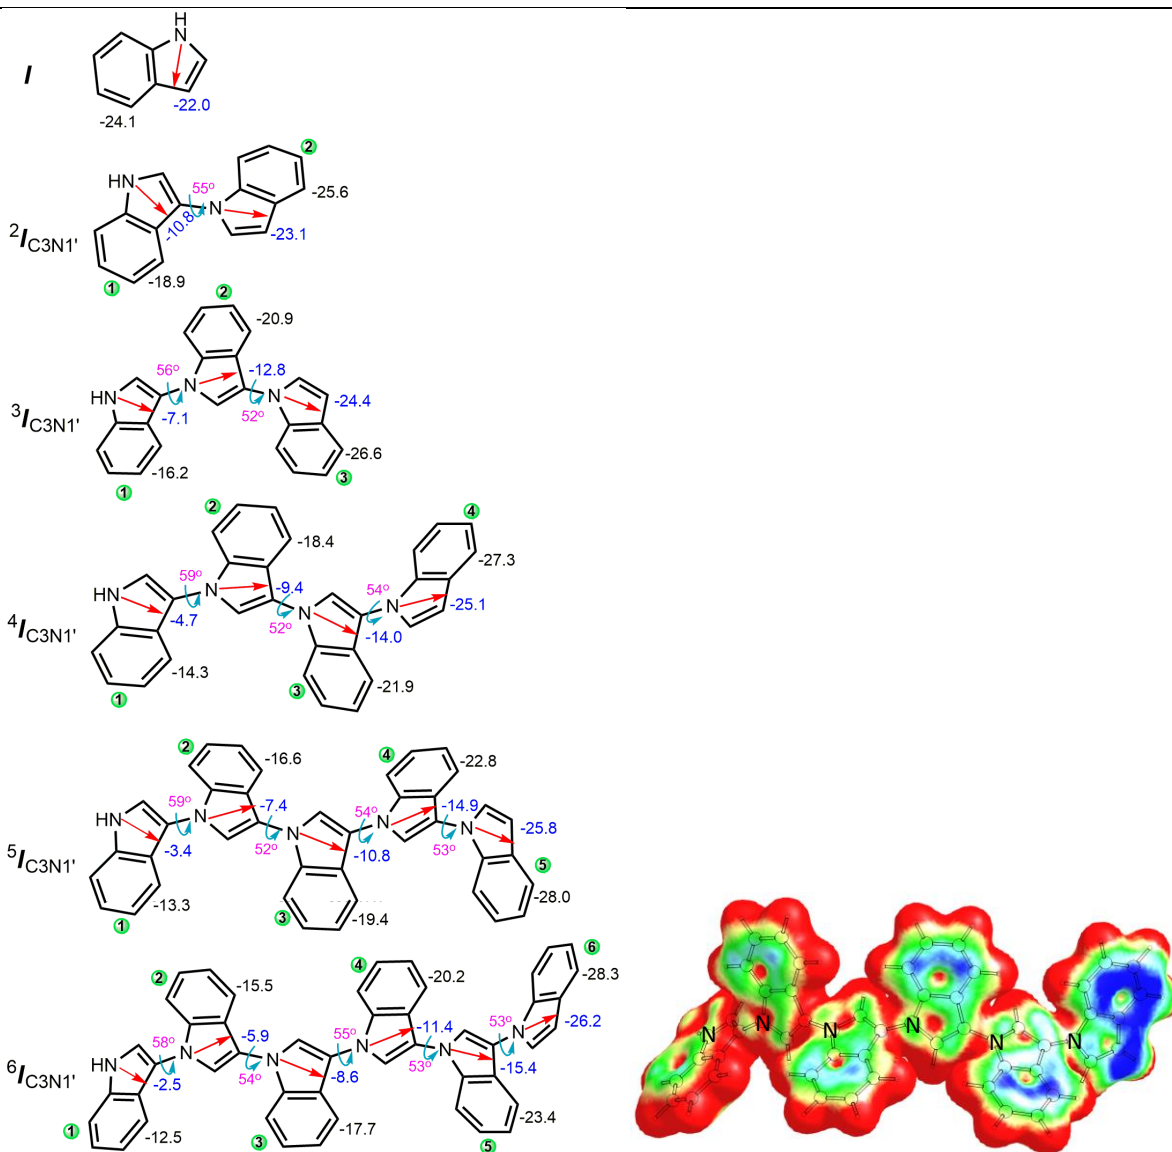

**Figure S13.** The direction of TSE and the variation in  $V_m$  values in 3, 1'-polyindoles (I to  $6I_{C3N1'}$ ). The  $V_m$  values of five- and six-membered rings are given in kcal/mol are represented in blue and black font respectively. The dihedral angle at the CCCC junctions between the adjacent rings are given in pink font. The MESP mapped on to 0.01 au electron density isosurface of  $6I_{C3N1'}$ , where coding from blue to red indicates MESP values in the range  $-0.02$  to  $0.02$  au.

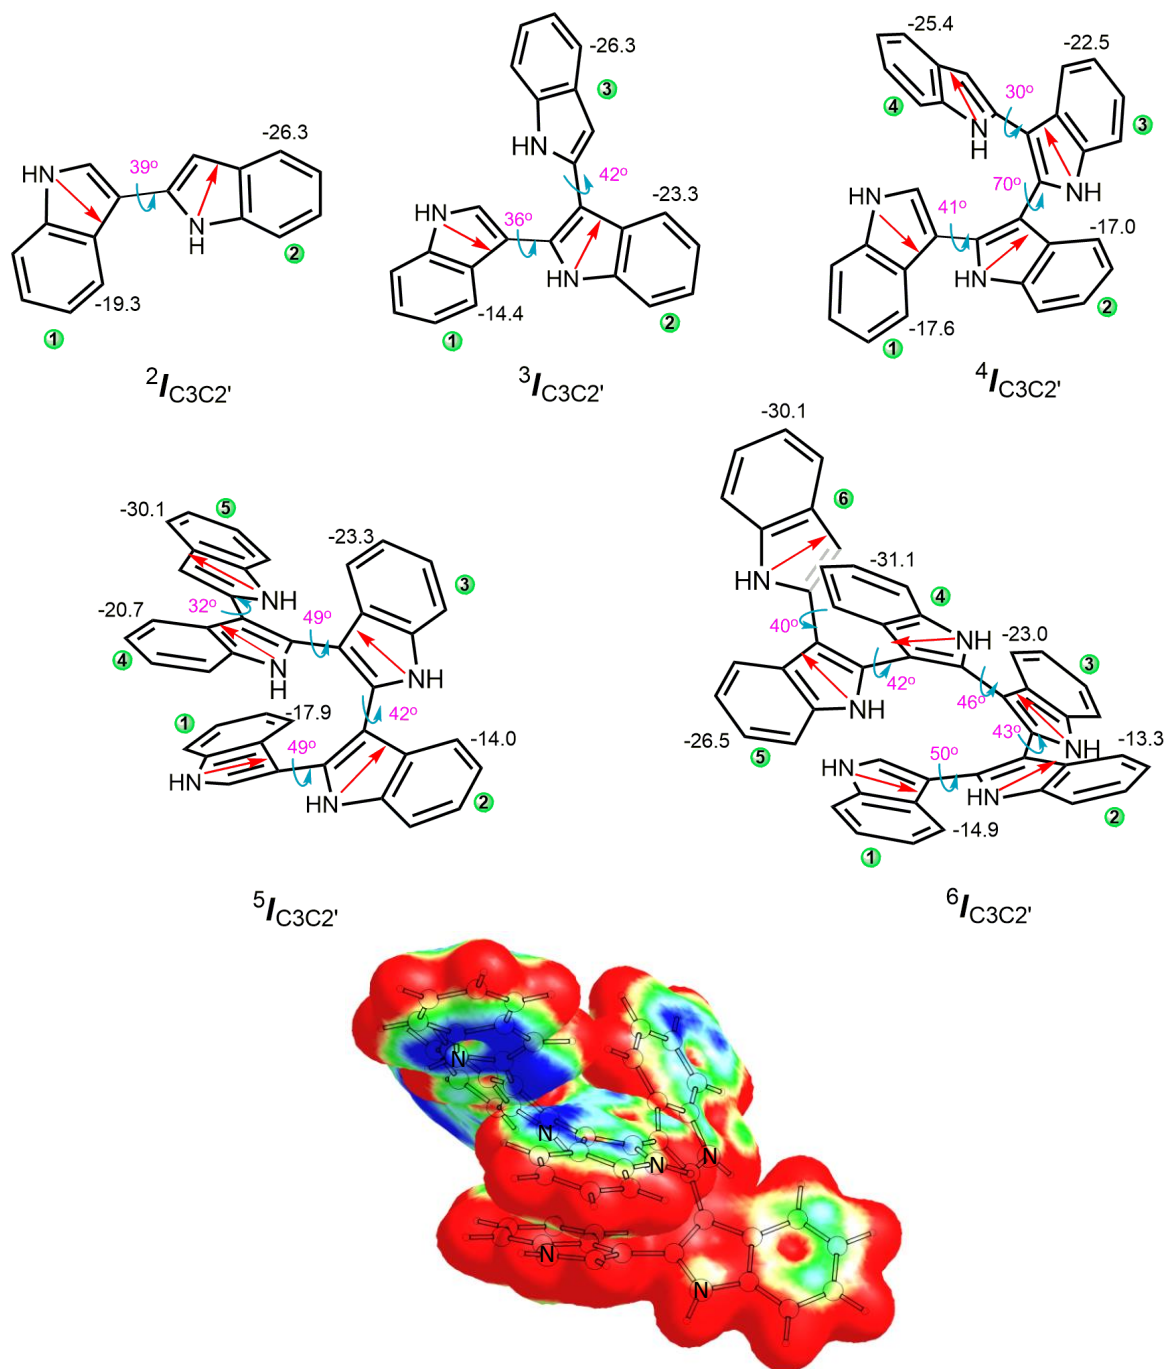

**Figure S14.** The direction of TSE and the variation in  $V_m$  values in 3,2'-polyindoles (2I<sub>C3C2'</sub> to 6I<sub>C3C2'</sub>). The  $V_m$  values of six-membered rings are given in kcal/mol are represented in black font respectively. The dihedral angle at the CCCC junctions between the adjacent rings are given in pink font. The MESP mapped on to 0.01 au electron density isosurface of 6I<sub>C3C2'</sub>, where coding from blue to red indicates MESP values in the range -0.02 to 0.02 au.

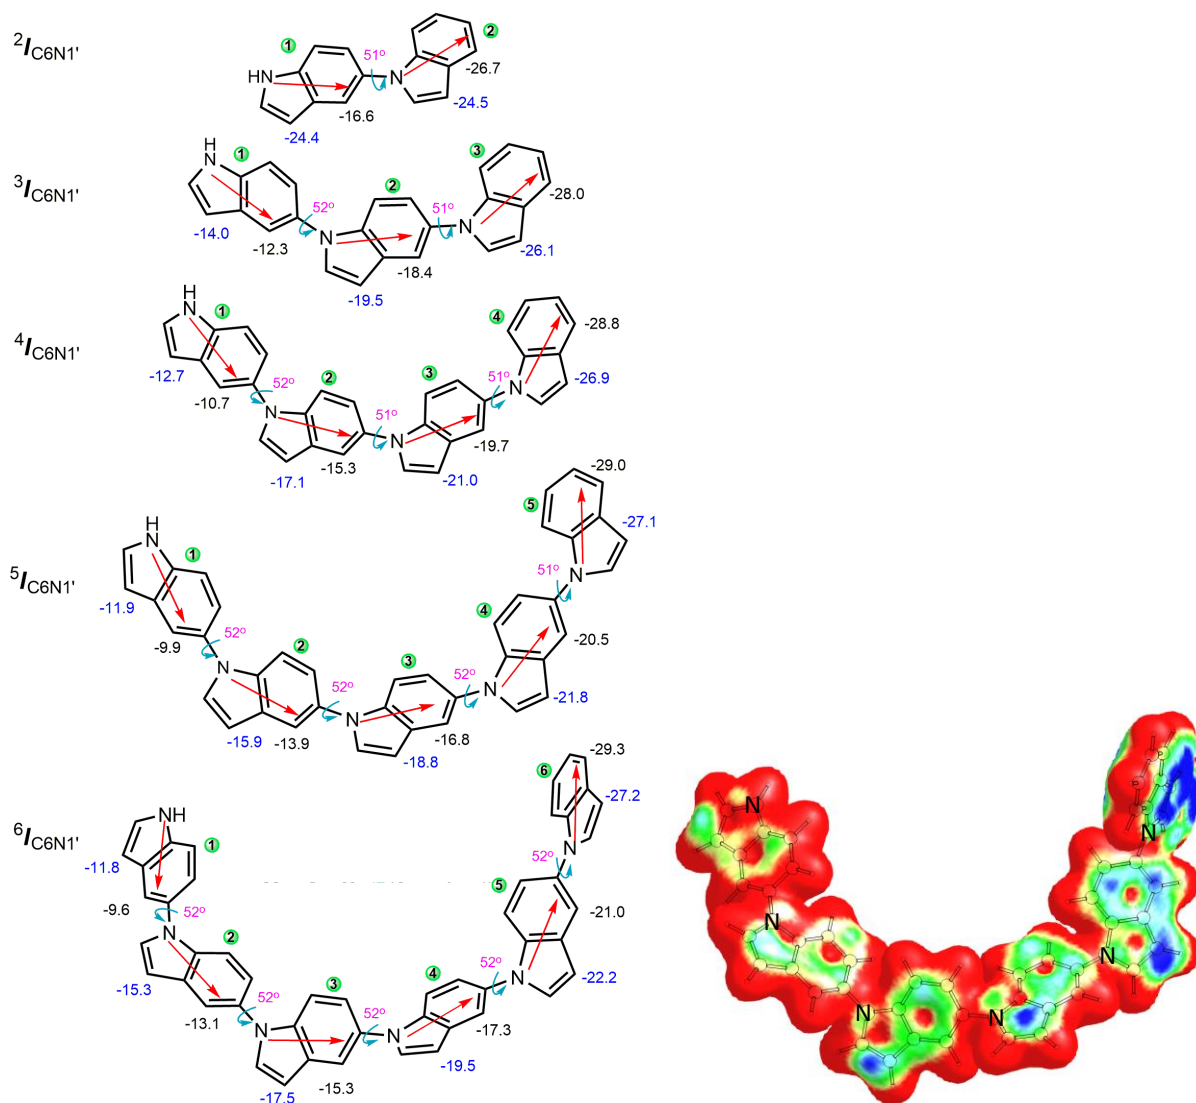

**Figure S15.** The direction of electron flow and the variation in  $V_m$  values in 6, 1'-polyindoles ( ${}^2I_{C6N1'}$  to  ${}^6I_{C6N1'}$ ). The  $V_m$  values of five- and six-membered rings are given in kcal/mol are represented in blue and black font respectively. The dihedral angle at the CCCC junctions between the adjacent rings are given in pink font. The MESP mapped on to 0.01 au electron density isosurface of  ${}^6I_{C3N1'}$ , where coding from blue to red indicates MESP values in the range -0.02 to 0.02 au.

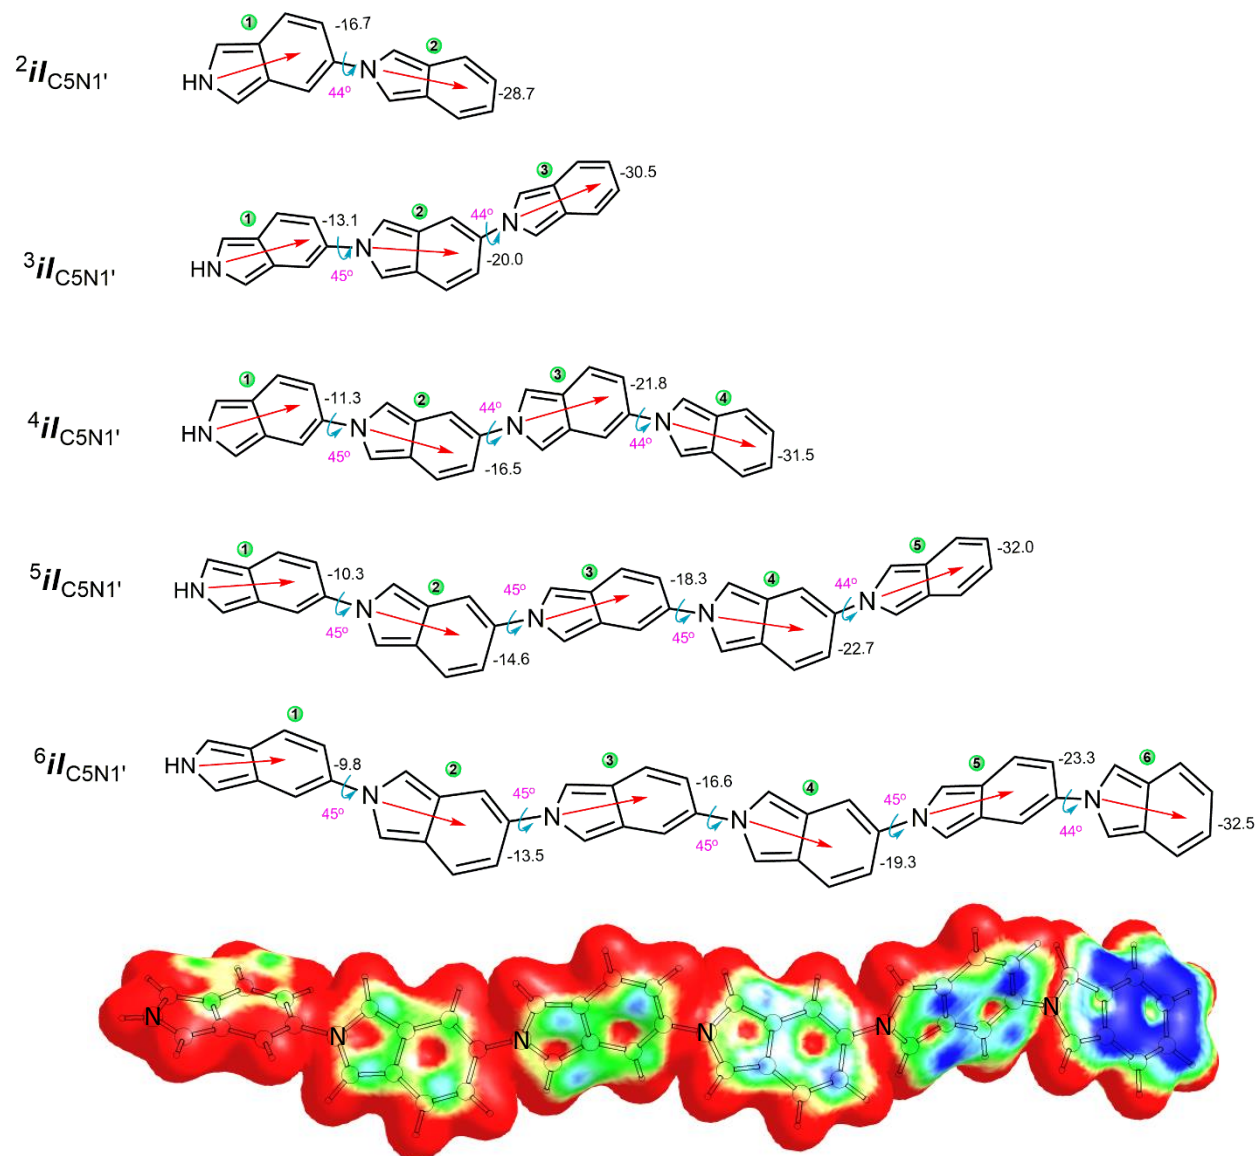

**Figure S16.** The direction of TSE and the variation in  $V_m$  values in polyisindoles ( ${}^2il_{C5N1'}$  to  ${}^6il_{C5N1'}$ ). The  $V_m$  values are given in kcal/mol (black font) and the dihedral angle at the CCCC junctions between the adjacent rings are given in pink font. The MESP mapped on to 0.01 au electron density isosurface of  ${}^6il_{C5N1'}$ , where coding from blue to red indicates MESP values in the range  $-0.02$  to  $0.02$  au.



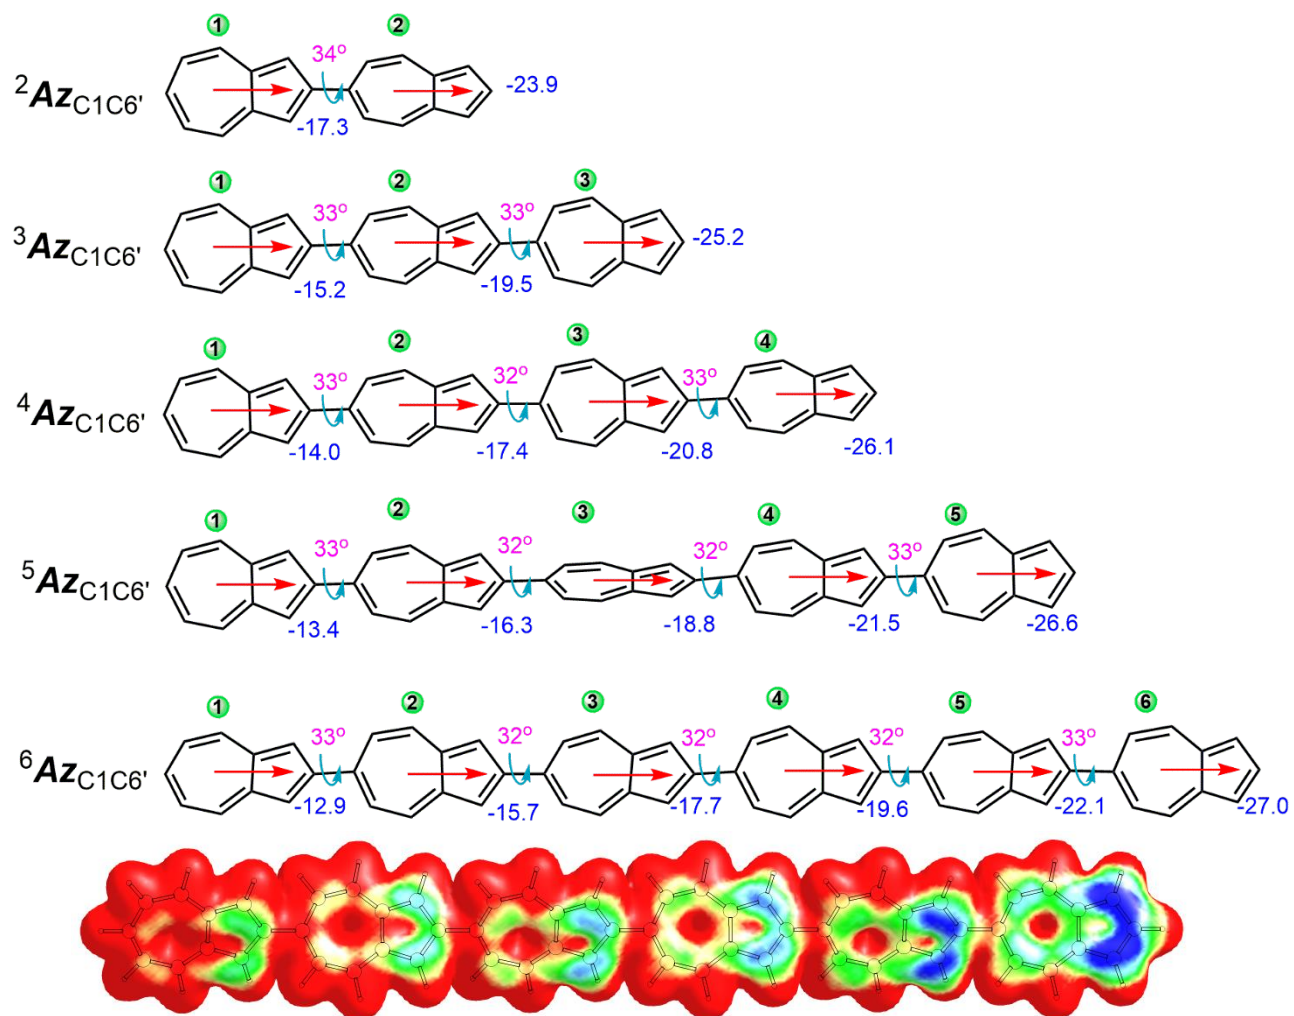

**Figure S17.** The direction of TSE and the variation in  $V_m$  values in polyazulenes ( $^2\text{Az}_{\text{C1C6}'}$  to  $^6\text{Az}_{\text{C1C6}'}$ ). The  $V_m$  values are given in kcal/mol (blue font) and azulene units from left to right are numbered from 1 to 6 respectively. The dihedral angle at the CCCC junctions between the adjacent units are given in pink font. The MESP mapped on to 0.01 au electron density isosurface of  $^6\text{Az}_{\text{C1C6}'}$ , where coding from blue to red indicates MESP values in the range -0.02 to 0.02 au.

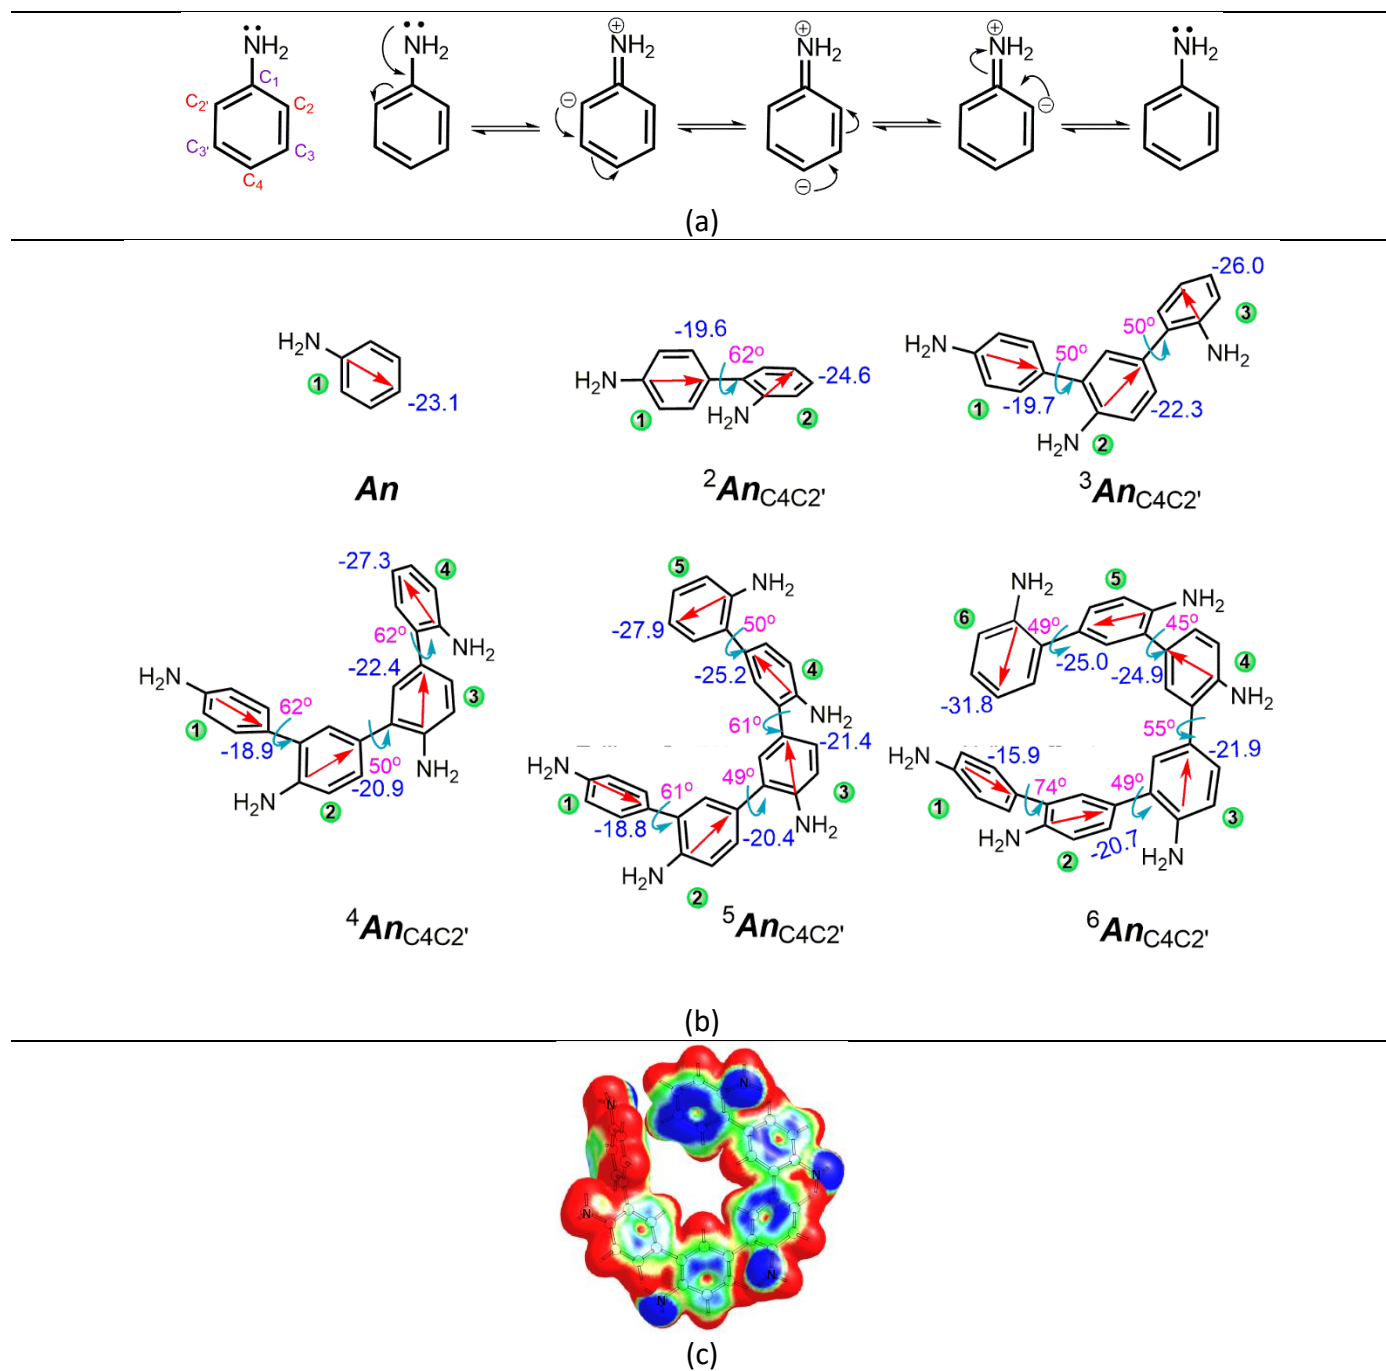

**Figure S18.** (a) Resonance contributors of aniline (b) The direction of TSE and the variation in  $V_m$  values in polyanilines ( $An$  to  ${}^6An_{C4C2'}$ ). The  $V_m$  values are given in kcal/mol (blue font) and aniline rings from left to right are numbered from 1 to 6 respectively. The dihedral angle at the CCCC junctions between the adjacent rings are given in pink font. (b) The MESP mapped on to 0.01 au electron density isosurface of  ${}^6An_{C4C2'}$ , where coding from blue to red indicates MESP values in the range  $-0.03$  to  $0.03$  au.

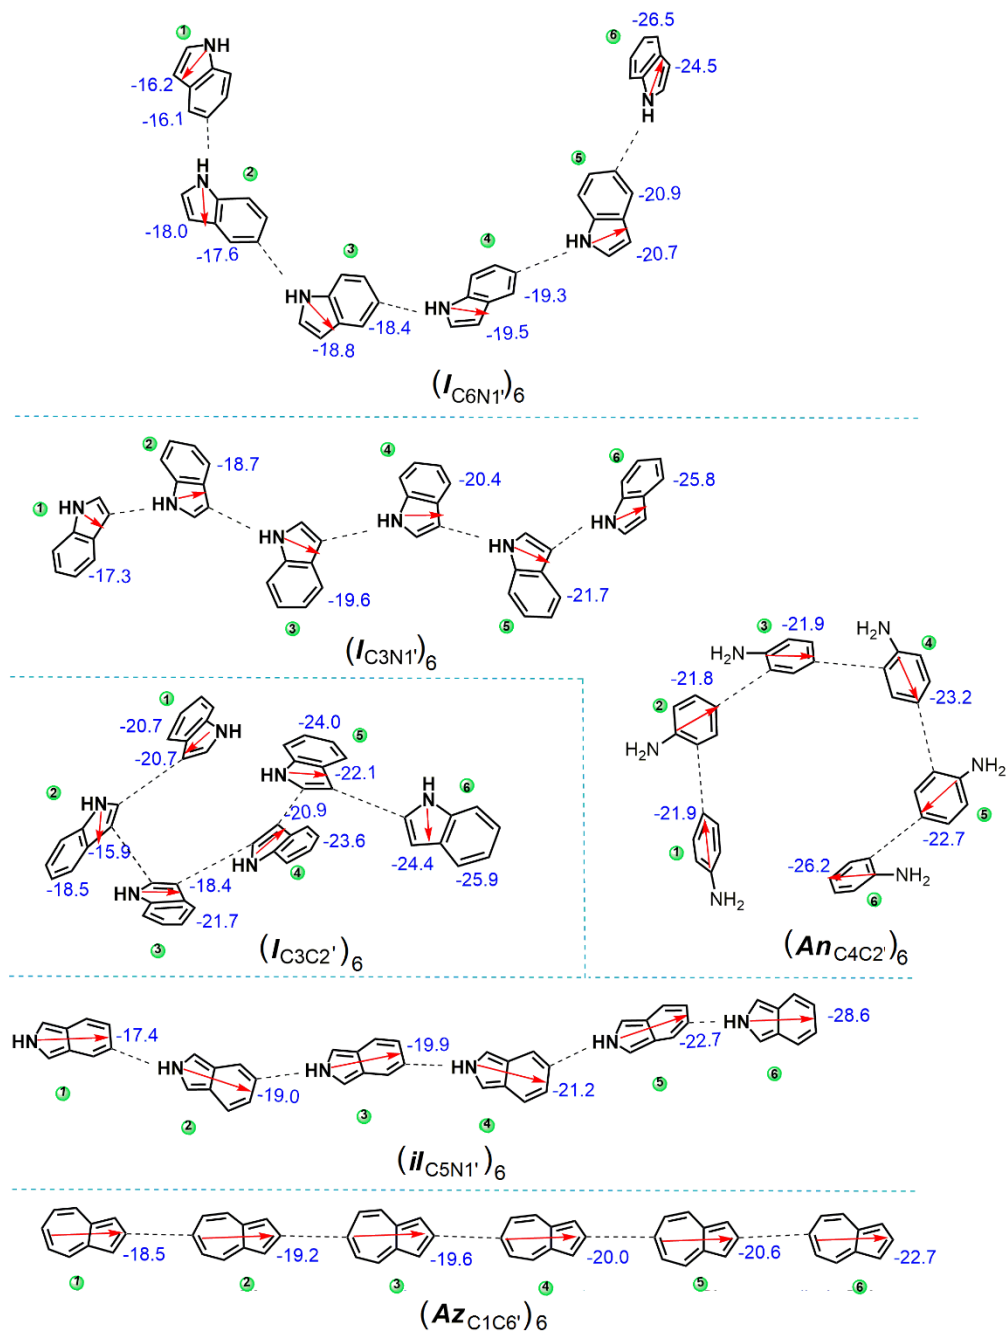

**Figure S19.** The direction of TSE in clusters of  $I_{C3N1'}$ ,  $I_{C3C2'}$ ,  $I_{C6N1'}$ ,  $il_{C5N1'}$ ,  $An_{C4C2'}$  and  $Az_{C1C6'}$  systems and the  $V_m$  values are given in kcal/mol (Dotted lines represent H...H distances  $\cong 0$ ).



**Table S2.** The SCF energy, dipole moment, HOMO energy, LUMO energy and HOMO-LUMO gap (HLG) of all the systems at M06-2X/6-311+G(d, p) level of theory

| System                          | SCF energy (au) | Dipole moment (D) | HOMO (eV) | LUMO (eV) | HLG (eV) |
|---------------------------------|-----------------|-------------------|-----------|-----------|----------|
| pyrrole                         | -210.135113     | 1.91              | -7.28     | 0.22      | 7.50     |
| <sup>2</sup> P <sub>C2C2'</sub> | -419.092585     | 0.93              | -6.46     | 0.10      | 6.56     |
| <sup>2</sup> P <sub>C3C3'</sub> | -419.087658     | 0.47              | -6.45     | 0.23      | 6.68     |
| <sup>2</sup> P <sub>N1N1'</sub> | -419.037167     | 0.00              | -7.53     | 0.38      | 7.91     |
| <sup>2</sup> P <sub>C2N1'</sub> | -419.078019     | 1.81              | -7.17     | 0.10      | 7.27     |
| <sup>2</sup> P <sub>C3N1'</sub> | -419.077622     | 3.81              | -7.12     | -0.01     | 7.12     |
| <sup>2</sup> P <sub>C3C2'</sub> | -419.090301     | 2.86              | -6.42     | 0.09      | 6.51     |
| <sup>3</sup> P <sub>C3N1'</sub> | -628.020696     | 6.03              | -6.86     | -0.12     | 6.74     |
| <sup>4</sup> P <sub>C3N1'</sub> | -836.963995     | 8.28              | -6.72     | -0.19     | 6.53     |
| <sup>5</sup> P <sub>C3N1'</sub> | -1045.907306    | 10.57             | -6.68     | -0.24     | 6.44     |
| <sup>6</sup> P <sub>C3N1'</sub> | -1254.850791    | 13.21             | -6.61     | -0.27     | 6.34     |
| <sup>3</sup> P <sub>C3C2'</sub> | -628.048771     | 4.22              | -6.15     | -0.03     | 6.11     |
| <sup>4</sup> P <sub>C3C2'</sub> | -837.008796     | 5.39              | -5.99     | -0.10     | 5.90     |
| <sup>5</sup> P <sub>C3C2'</sub> | -1045.964679    | 6.35              | -5.85     | -0.14     | 5.70     |
| <sup>6</sup> P <sub>C3C2'</sub> | -1254.923696    | 6.28              | -5.75     | -0.17     | 5.58     |
| <b>1-PhP</b>                    | -441.140786     | 2.28              | -7.24     | 0.10      | 7.34     |
| <b>2-PhP</b>                    | -441.149684     | 1.85              | -7.19     | 0.18      | 7.37     |
| <b>3-PhP</b>                    | -441.148589     | 2.12              | -7.32     | 0.18      | 7.50     |
| <b>1, 1'-PhDP</b>               | -650.089131     | 0.00              | -7.38     | -0.28     | 7.10     |
| <b>2, 2'-PhDP</b>               | -650.110482     | 0.00              | -6.47     | -0.33     | 6.14     |
| <b>3, 3'-PhDP</b>               | -650.106479     | 6.34              | -6.47     | 0.15      | 6.62     |
| <b>1, 3'-PhDP</b>               | -650.098642     | 4.24              | -6.91     | -0.01     | 6.90     |
| <b>HPB<sub>N1</sub></b>         | -1478.755814    | 0.00              | -7.34     | -0.85     | 6.48     |
| <b>HPB<sub>C2</sub></b>         | -1478.711554    | 0.02              | -6.56     | -0.42     | 6.13     |
| <b>HPB<sub>C3</sub></b>         | -1478.787673    | 4.48              | -6.07     | 0.13      | 6.20     |
| <b>HPB<sub>N1</sub>6σ</b>       | -1485.854932    | 0.87              | -5.82     | -0.82     | 5.00     |
| <b>HPB<sub>C2</sub>6σ</b>       | -1485.929707    | 3.88              | -5.98     | -0.70     | 5.28     |
| <b>HPB<sub>C3</sub>6σ</b>       | -1485.902467    | 6.88              | -5.33     | -0.05     | 5.29     |
| <b>OPN<sub>N1</sub></b>         | -2057.335592    | 0.04              | -7.09     | -1.86     | 5.23     |
| <b>OPN<sub>N1</sub>6σ</b>       | -2047.870308    | 0.00              | -5.50     | -1.51     | 3.99     |

|                                        |              |       |       |       |      |
|----------------------------------------|--------------|-------|-------|-------|------|
| <b>OPN</b> <sub>C36σ</sub>             | -2047.966596 | 0.03  | -4.88 | -0.26 | 4.61 |
| <b>DPC</b> <sub>N1</sub>               | -2857.433340 | 0.29  | -6.88 | -2.03 | 4.85 |
| <b>DPC</b> <sub>C3</sub>               | -2857.505526 | 4.60  | -5.42 | 0.04  | 5.46 |
| Indole                                 | -363.756824  | 2.11  | -7.06 | 0.11  | 7.17 |
| <sup>2</sup> <b>I</b> <sub>C3N1'</sub> | -726.335890  | 3.63  | -6.73 | -0.13 | 6.60 |
| <sup>3</sup> <b>I</b> <sub>C3N1'</sub> | -1088.887740 | 5.52  | -6.54 | -0.23 | 6.31 |
| <sup>4</sup> <b>I</b> <sub>C3N1'</sub> | -1451.453493 | 7.48  | -6.45 | -0.30 | 6.15 |
| <sup>5</sup> <b>I</b> <sub>C3N1'</sub> | -1814.019290 | 9.49  | -6.40 | -0.36 | 6.05 |
| <sup>6</sup> <b>I</b> <sub>C3N1'</sub> | -2176.585098 | 11.22 | -6.37 | -0.39 | 5.97 |
| <sup>2</sup> <b>I</b> <sub>C3C2'</sub> | -726.335890  | 3.63  | -6.53 | -0.12 | 6.41 |
| <sup>3</sup> <b>I</b> <sub>C3C2'</sub> | -1088.918578 | 4.49  | -6.54 | -0.23 | 6.31 |
| <sup>4</sup> <b>I</b> <sub>C3C2'</sub> | -1451.503285 | 3.30  | -6.38 | -0.32 | 6.06 |
| <sup>5</sup> <b>I</b> <sub>C3C2'</sub> | -1814.101744 | 5.66  | -6.09 | -0.45 | 5.64 |
| <sup>6</sup> <b>I</b> <sub>C3C2'</sub> | -2176.683402 | 7.09  | -6.04 | -0.51 | 5.52 |
| <sup>2</sup> <b>I</b> <sub>C6N1'</sub> | -726.324788  | 4.57  | -6.71 | -0.10 | 6.61 |
| <sup>3</sup> <b>I</b> <sub>C6N1'</sub> | -1088.893201 | 6.91  | -6.59 | -0.25 | 6.34 |
| <sup>4</sup> <b>I</b> <sub>C6N1'</sub> | -1451.461808 | 8.64  | -6.53 | -0.32 | 6.21 |
| <sup>5</sup> <b>I</b> <sub>C6N1'</sub> | -1814.030487 | 9.50  | -6.51 | -0.36 | 6.15 |
| <sup>6</sup> <b>I</b> <sub>C6N1'</sub> | -2176.599293 | 9.98  | -6.50 | -0.37 | 6.13 |
| isoindole                              | -363.741162  | 2.69  | -6.38 | 0.07  | 6.45 |
| <sup>2</sup> <b>il</b>                 | -726.294333  | 6.06  | -6.20 | -0.49 | 5.71 |
| <sup>3</sup> <b>il</b>                 | -1088.847838 | 9.97  | -6.11 | -0.73 | 5.37 |
| <sup>4</sup> <b>il</b>                 | -1451.401615 | 13.97 | -6.05 | -0.86 | 5.19 |
| <sup>5</sup> <b>il</b>                 | -1813.955571 | 18.27 | -6.02 | -0.94 | 5.08 |
| <sup>6</sup> <b>il</b>                 | -2176.509521 | 22.31 | -6.00 | -0.98 | 5.02 |
| Azulene                                | -385.754624  | 1.26  | -6.68 | -1.49 | 5.20 |
| <sup>2</sup> <b>Az</b>                 | -770.329854  | 3.34  | -6.59 | -2.08 | 4.52 |
| <sup>3</sup> <b>Az</b>                 | -1154.905556 | 5.94  | -6.53 | -2.35 | 4.18 |
| <sup>4</sup> <b>Az</b>                 | -1539.481290 | 8.86  | -6.49 | -2.50 | 3.99 |
| <sup>5</sup> <b>Az</b>                 | -1924.057144 | 11.92 | -6.46 | -2.59 | 3.88 |
| <sup>6</sup> <b>Az</b>                 | -2308.632953 | 15.14 | -6.44 | -2.65 | 3.80 |
| Aniline                                | -287.553474  | 1.52  | -7.10 | 0.31  | 7.42 |
| <sup>2</sup> <b>An</b>                 | -573.924979  | 2.82  | -6.73 | 0.13  | 6.86 |

|                           |              |      |       |       |      |
|---------------------------|--------------|------|-------|-------|------|
| <sup>3</sup> An           | -860.299622  | 4.44 | -6.52 | 0.13  | 6.65 |
| <sup>4</sup> An           | -1146.669773 | 3.62 | -6.43 | 0.05  | 6.49 |
| <sup>5</sup> An           | -1433.042957 | 3.67 | -6.33 | 0.02  | 6.35 |
| <sup>6</sup> An           | -1719.417556 | 2.35 | -6.25 | 0.04  | 6.29 |
| <i>HAzB</i> <sub>C1</sub> | -2539.639777 | 0.01 | -6.31 | -1.59 | 4.72 |
| <i>HAzB</i> <sub>C6</sub> | -2539.619065 | 0.00 | -6.66 | -1.93 | 4.72 |

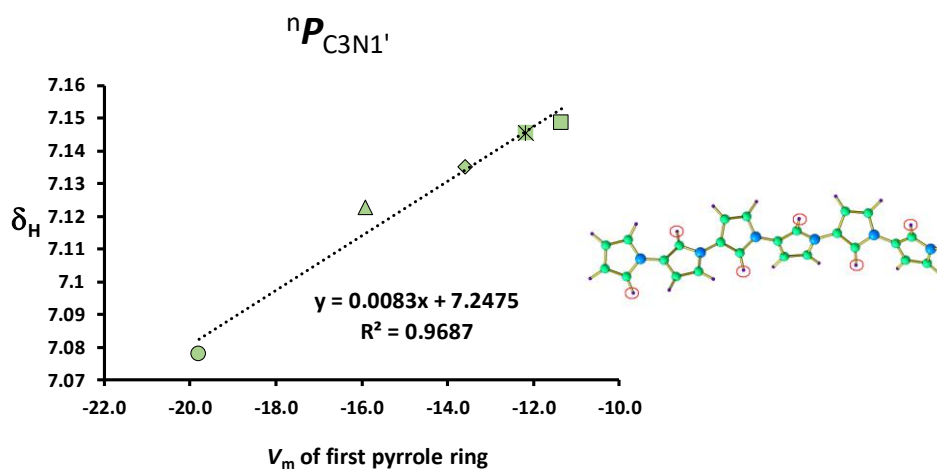

**Figure S20a.** Relation between chemical shift at the H center (in ppm) and MESP at the last pyrrole ring (in kcal/mol) in  ${}^n\mathbf{P}_{\text{C3N1}'}$  systems ( ${}^2\mathbf{P}_{\text{C3N1}'}$  to  ${}^6\mathbf{P}_{\text{C3N1}'}$ ).

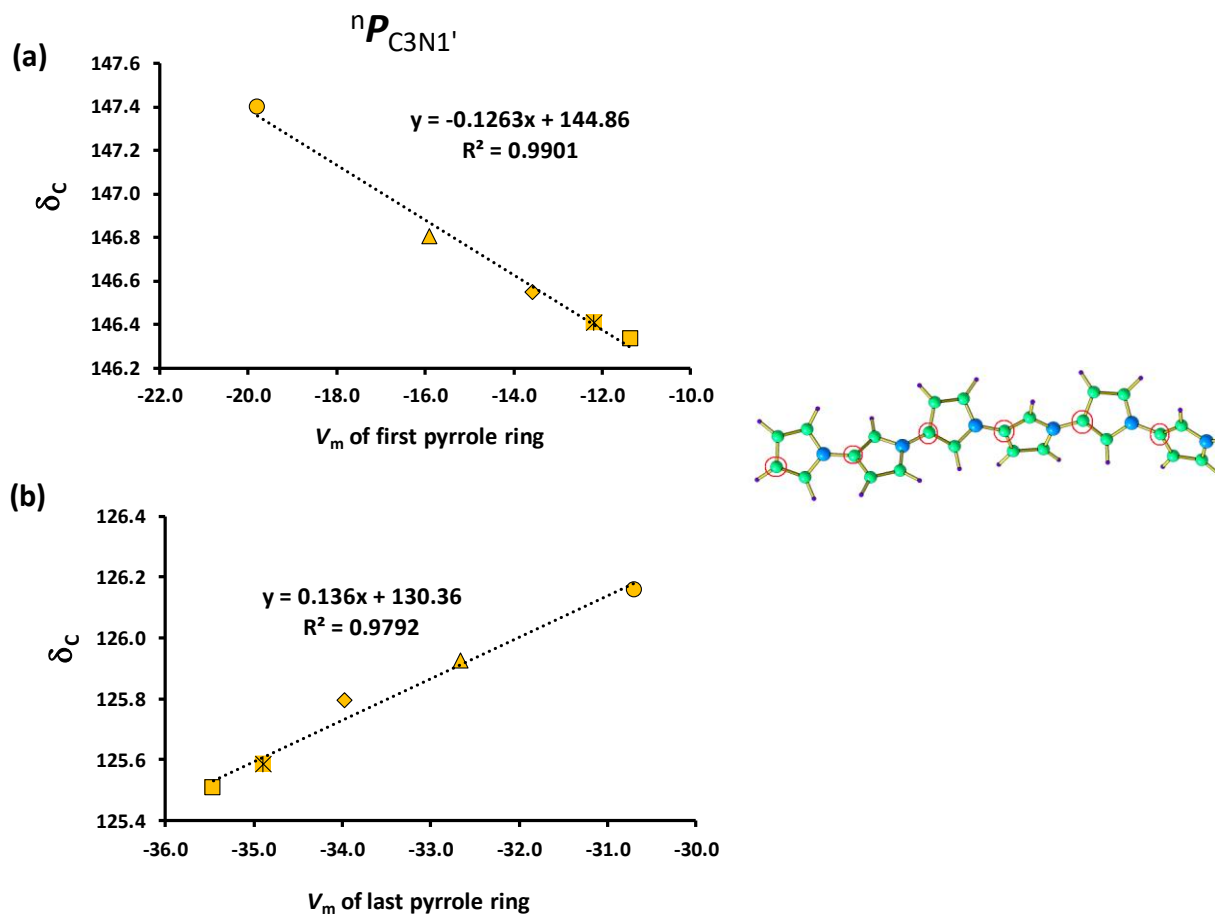

**Figure S20b.** Relation between chemical shift at the C center (in ppm) and MESP (in kcal/mol) at the (a) first pyrrole ring and (b) last pyrrole ring in  ${}^n\text{P}_{\text{C3N1}'}$  systems ( ${}^2\text{P}_{\text{C3N1}'}$  to  ${}^6\text{P}_{\text{C3N1}'}$ ).

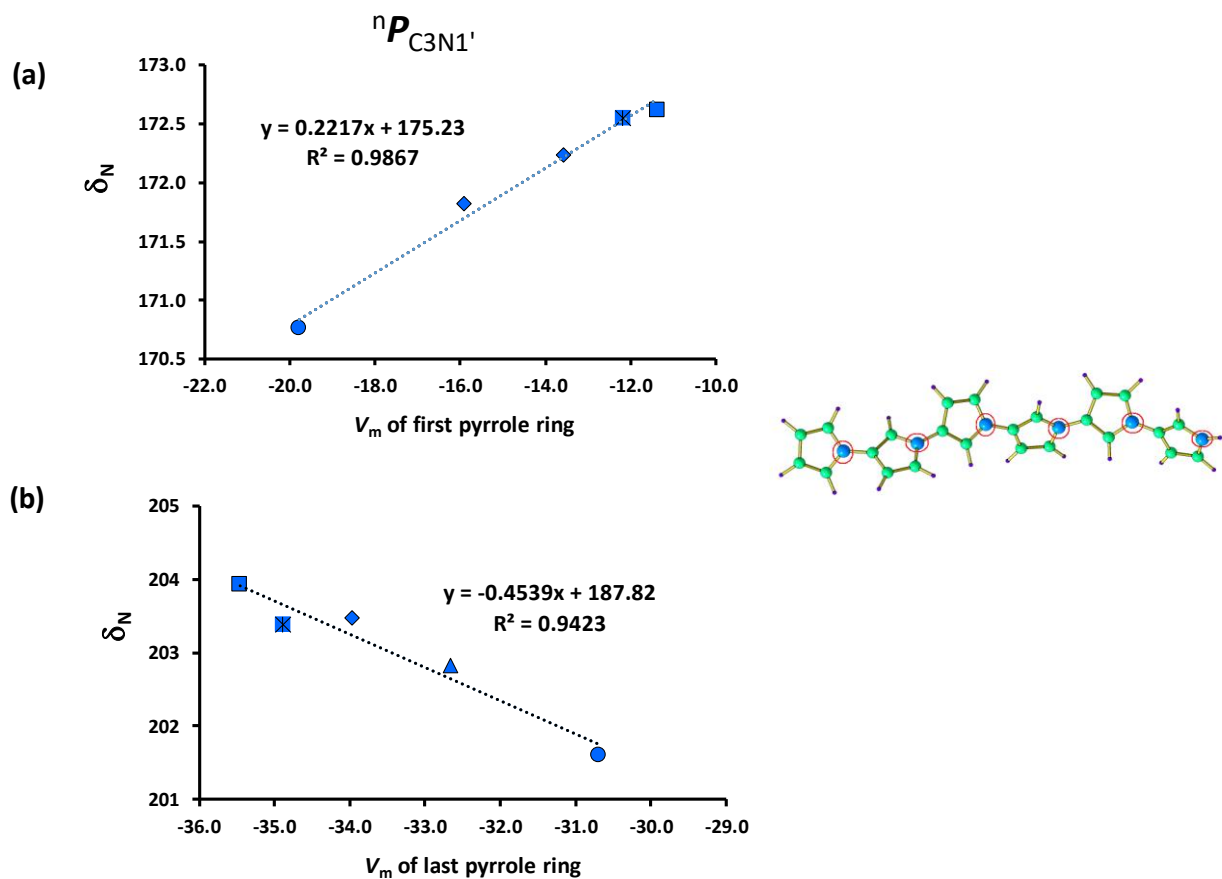

**Figure S20c.** Relation between chemical shift at the N center (in ppm) and MESP at the (a) first pyrrole ring and (b) last pyrrole ring (in kcal/mol) in  ${}^n\text{P}_{\text{C3N1}'}$  systems ( ${}^2\text{P}_{\text{C3N1}'}$  to  ${}^6\text{P}_{\text{C3N1}'}$ ).

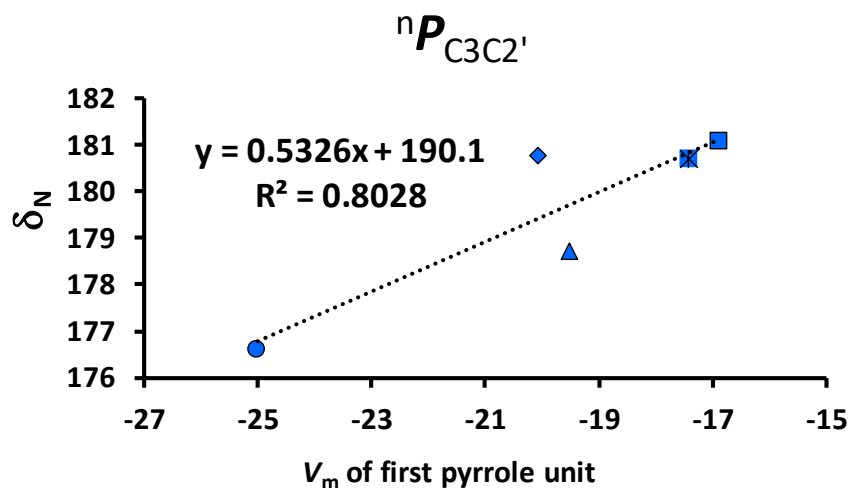

**Figure S20d.** Relation between chemical shift at the N center (in ppm) and MESP at the first pyrrole ring (in kcal/mol) in  ${}^n\text{P}_{\text{C3C2}'}$  systems ( ${}^2\text{P}_{\text{C3C2}'}$  to  ${}^6\text{P}_{\text{C3C2}'}$ ).

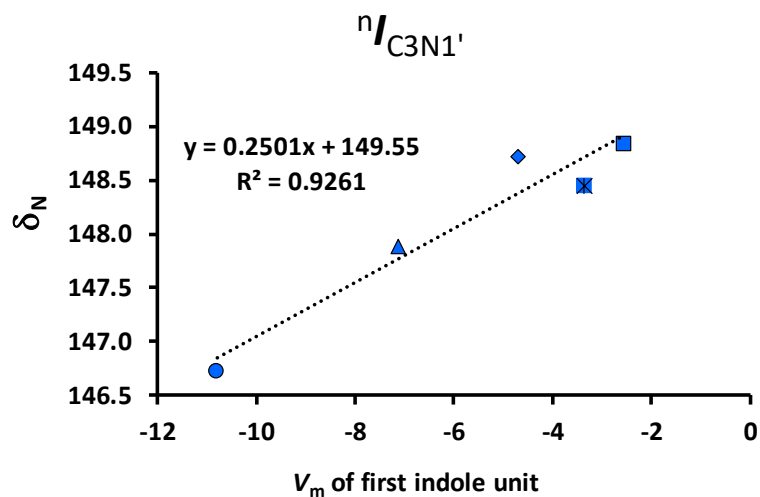

**Figure S20e.** Relation between chemical shift at the N center (in ppm) and MESP at the first indole unit (in kcal/mol) in  ${}^nI_{C3N1'}$  systems ( ${}^2I_{C3N1'}$  to  ${}^6I_{C3N1'}$ ).

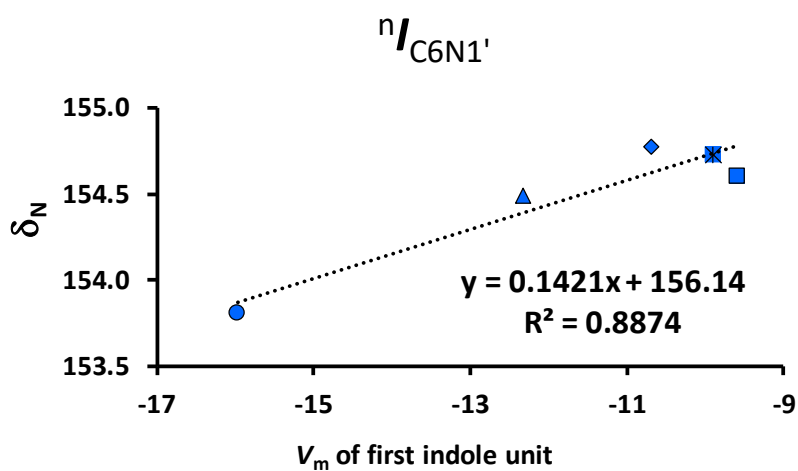

**Figure S20f.** Relation between chemical shift at the N center (in ppm) and MESP at the first indole unit (in kcal/mol) in  ${}^nI_{C6N1'}$  systems ( ${}^2I_{C6N1'}$  to  ${}^6I_{C6N1'}$ ).

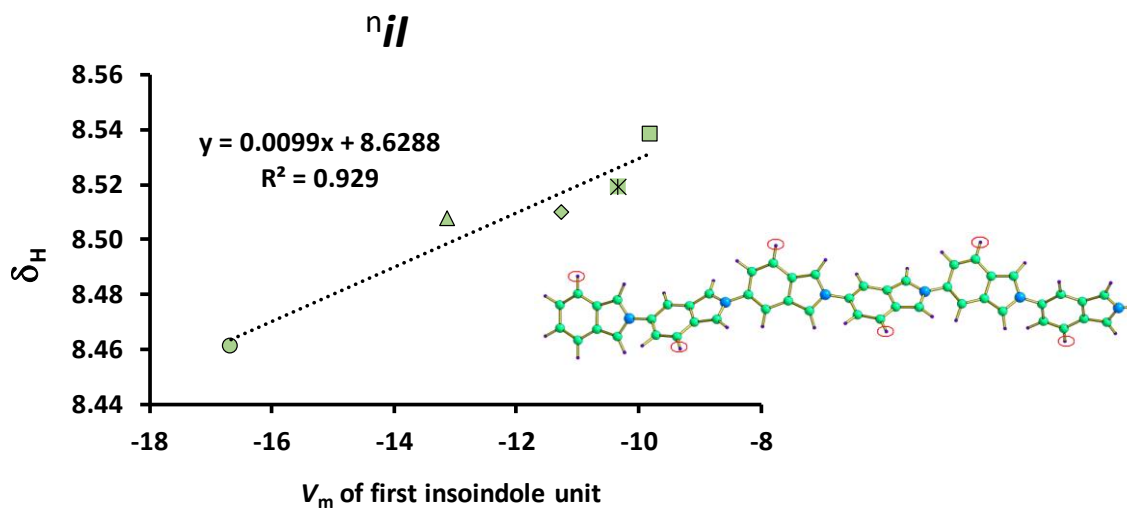

**Figure S20g.** Relation between chemical shift at the H center (in ppm) and MESP at the first isoindole unit (in kcal/mol) in  $nli$  systems ( ${}^2li$  to  ${}^6li$ ).

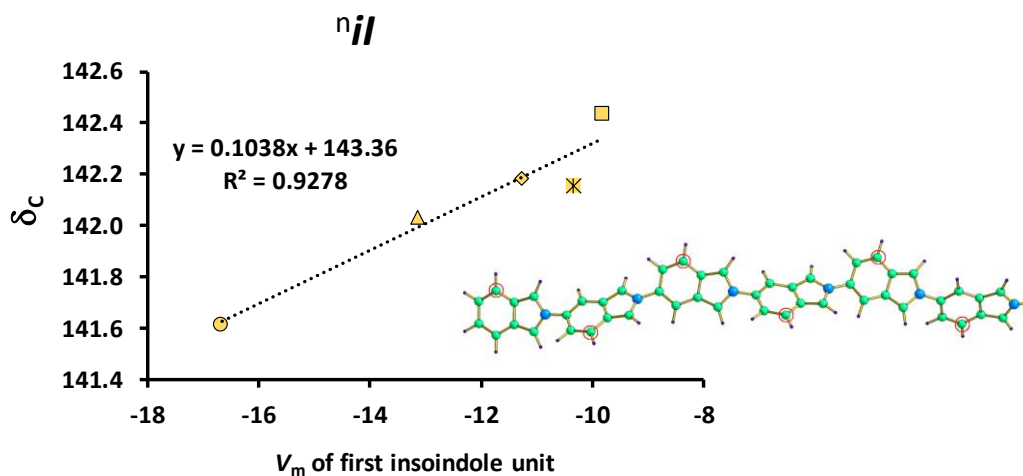

**Figure S20h.** Relation between chemical shift at the C center (in ppm) and MESP at the first isoindole unit (in kcal/mol) in  $nli$  systems ( ${}^2li$  to  ${}^6li$ ).

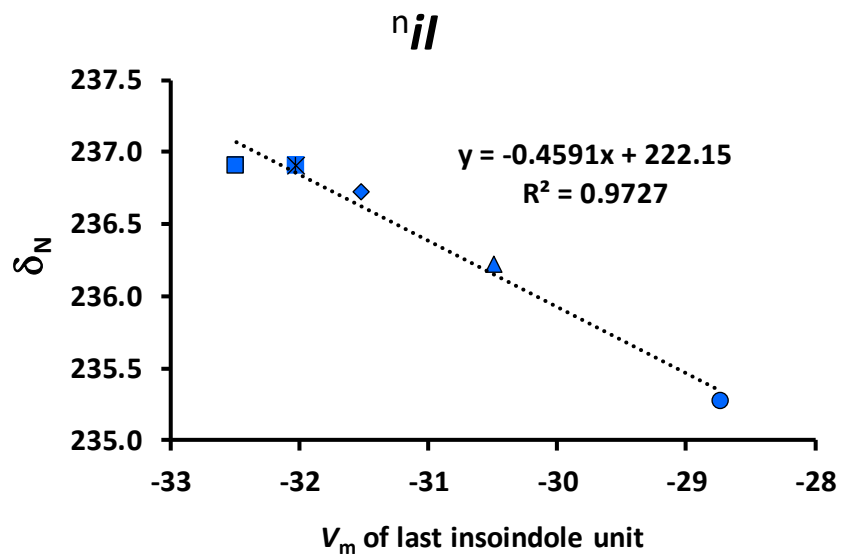

**Figure S20i.** Relation between chemical shift at the N center (in ppm) and MESP at the first isoindole unit (in kcal/mol) in <sup>n</sup>II systems (<sup>2</sup>II to <sup>6</sup>II).

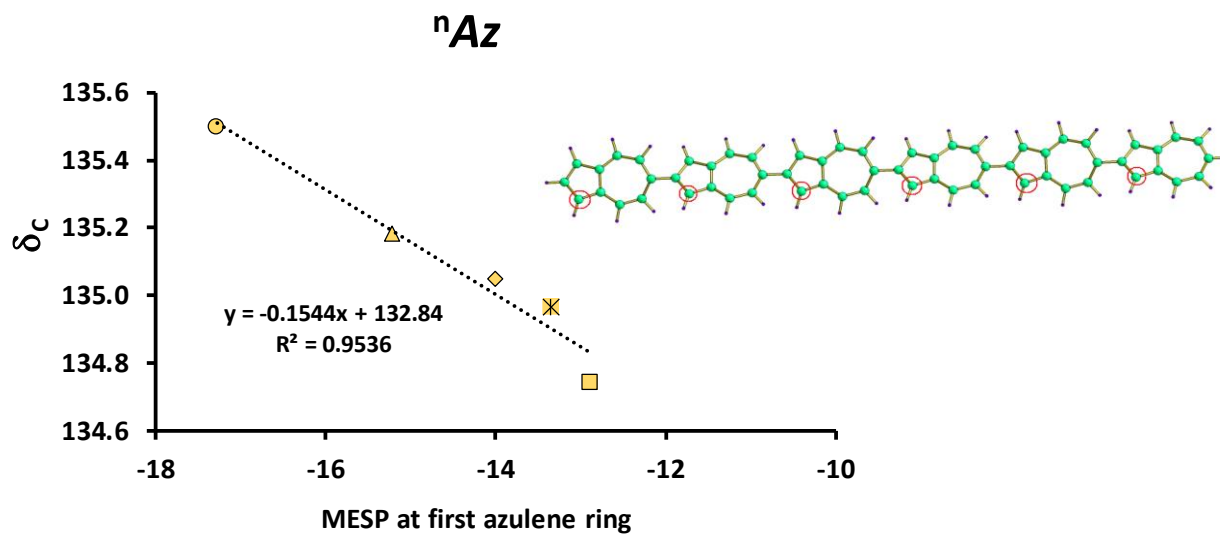

**Figure S20j.** Relation between chemical shift at the C center (in ppm) and MESP at the first azulene unit (in kcal/mol) in <sup>n</sup>Az systems (<sup>2</sup>Az to <sup>6</sup>Az).



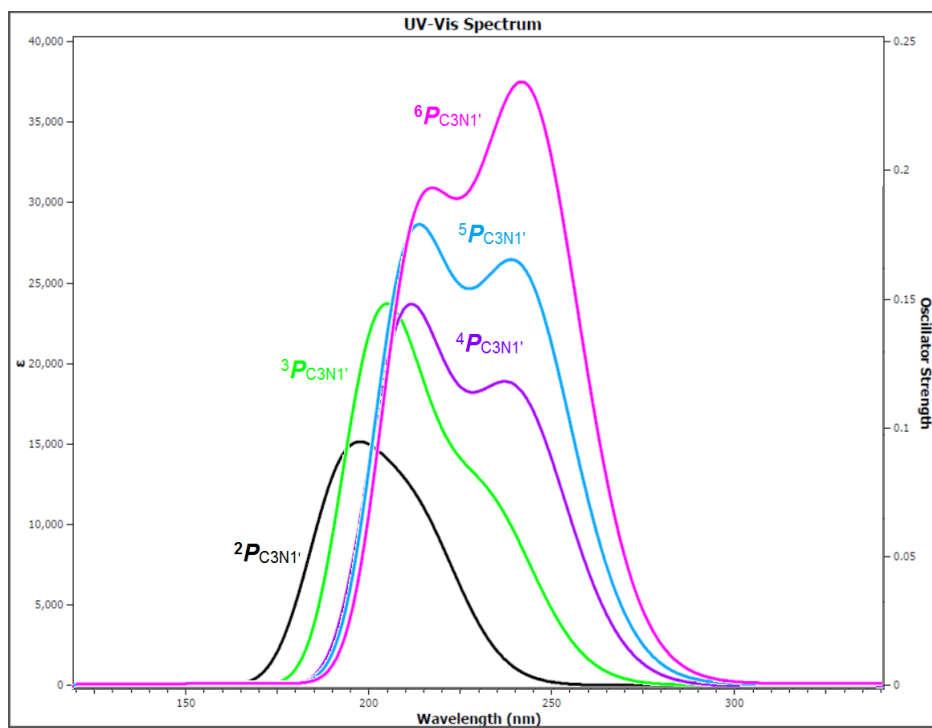

**Figure S21a.** Simulated absorption spectra of  $^nP_{C3N1'}$  where  $n = 2$  to  $6$ .

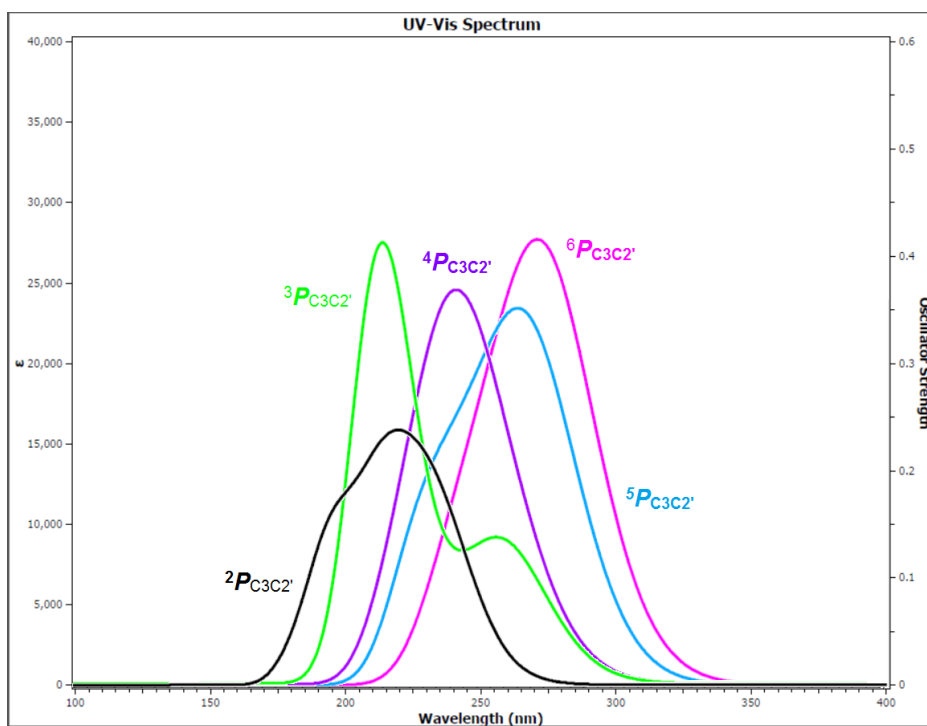

**Figure S21b.** Simulated absorption spectra of  $^nP_{C3C2'}$  where  $n = 2$  to  $6$ .

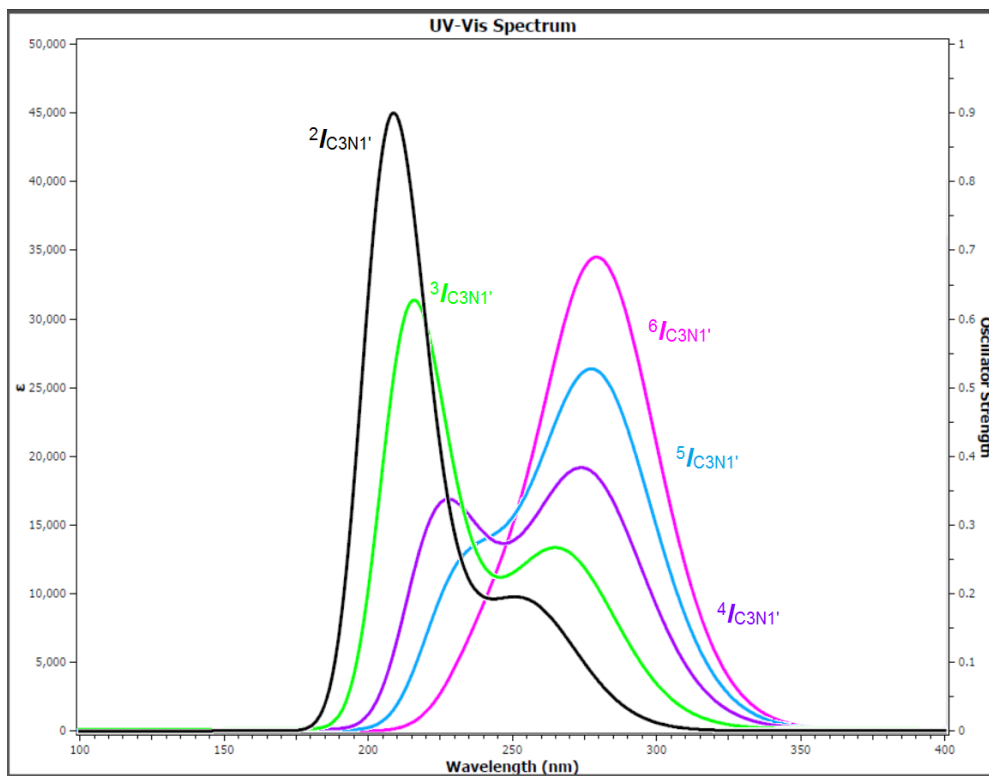

**Figure S21c.** Simulated absorption spectra of  $nI_{C3N1'}$  where  $n = 2$  to  $6$ .

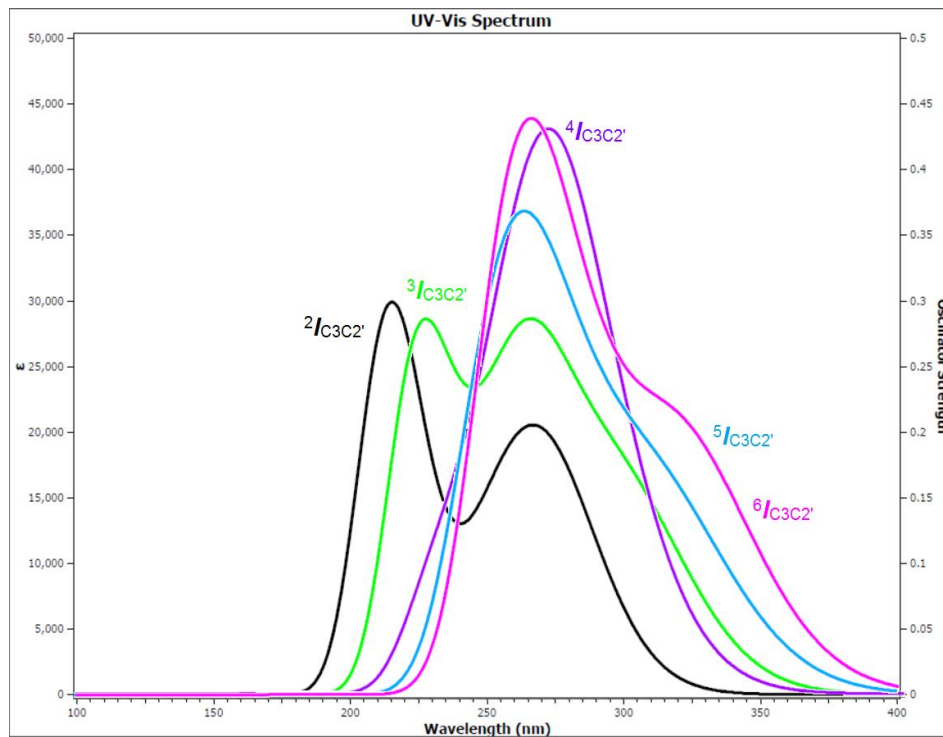

**Figure S21d.** Simulated absorption spectra of  $nI_{C3C2'}$  where  $n = 2$  to  $6$ .

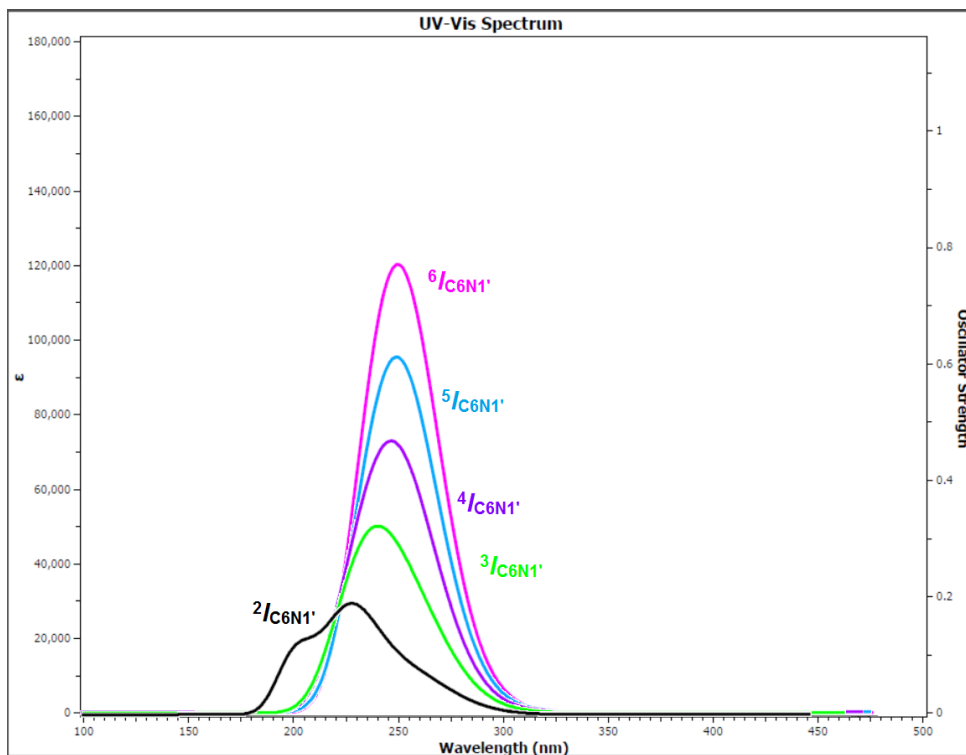

Figure S21e. Simulated absorption spectra of  ${}^nI_{C6N1'}$  where n = 2 to 6.

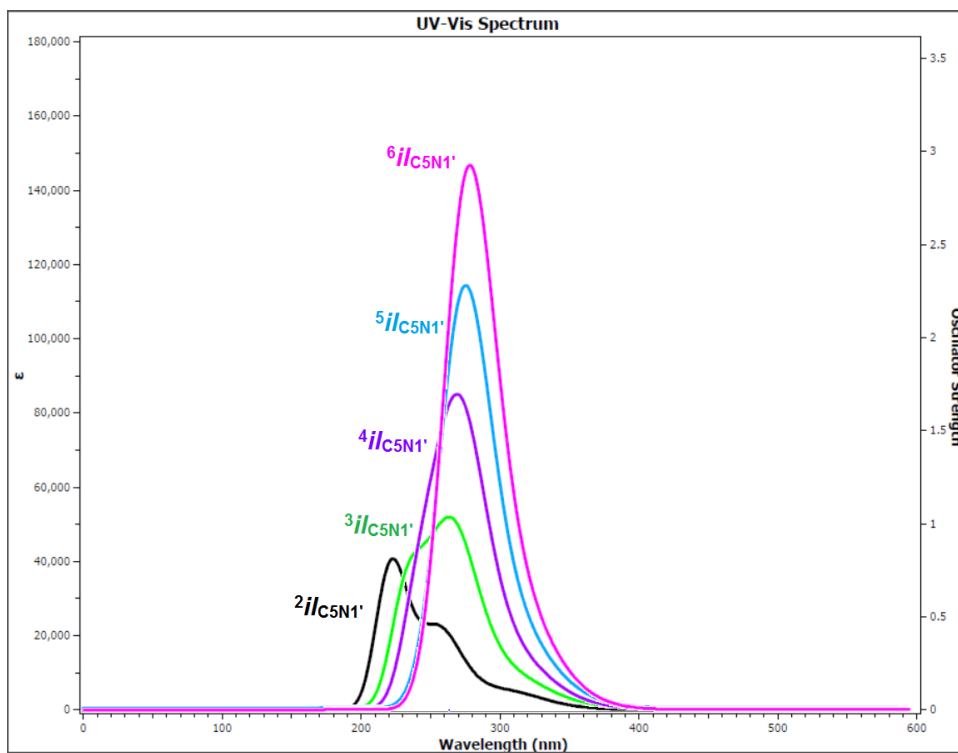

Figure S21f. Simulated absorption spectra of  ${}^niI_{C5N1'}$  where n = 2 to 6.

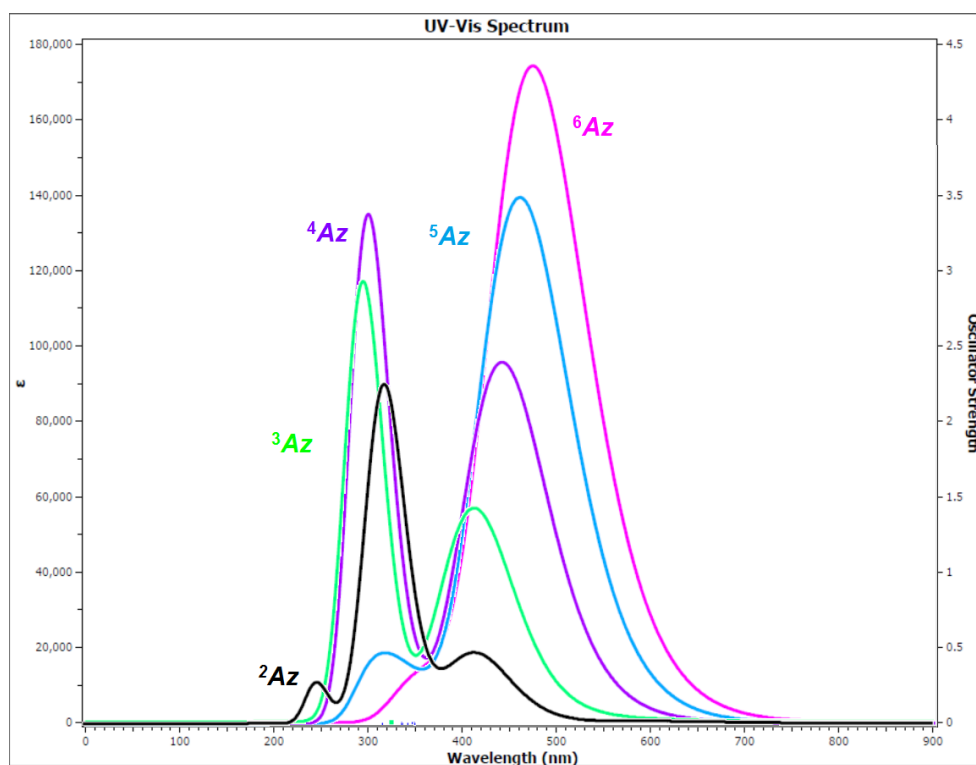

Figure S21g. Simulated absorption spectra of  $^nAz$ , where  $n = 2$  to  $6$ .

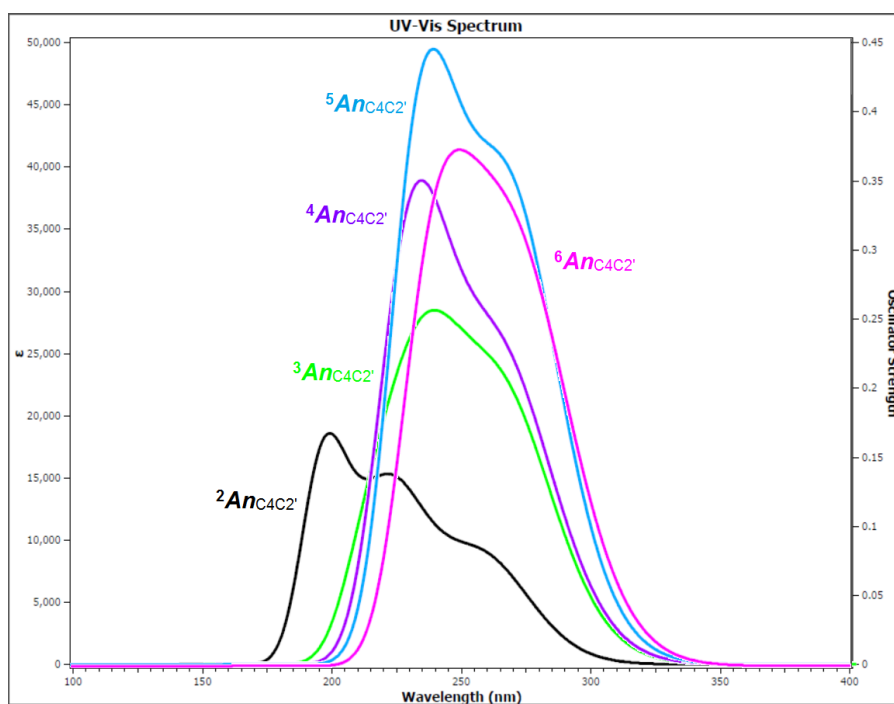

Figure S21h. Simulated absorption spectra of  $^nAn_{C4C2'}$ , where  $n = 2$  to  $6$ .

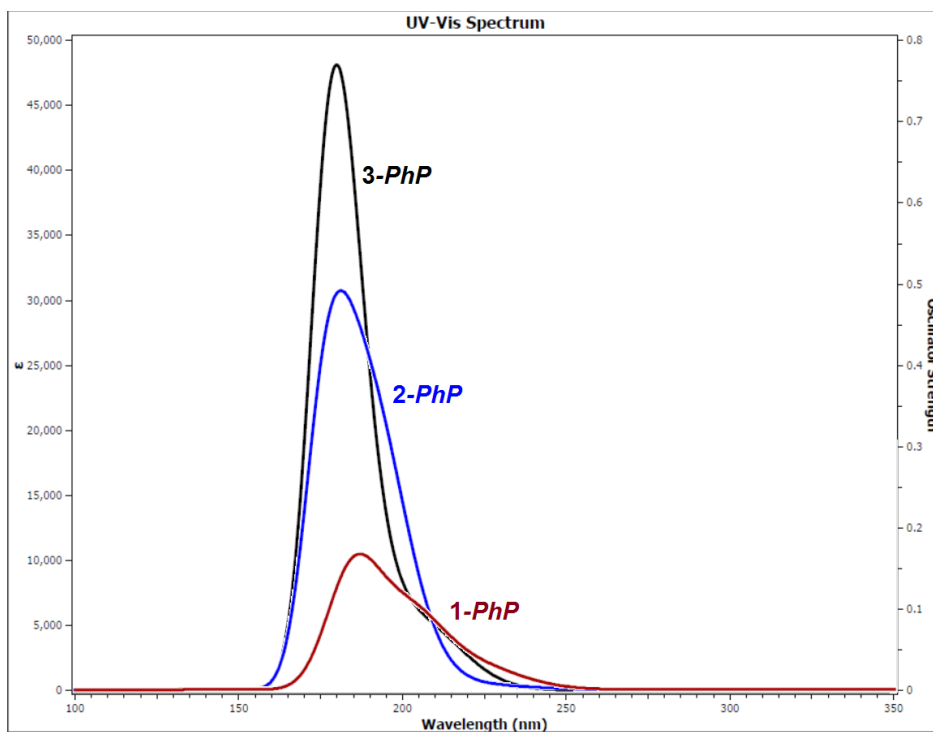

Figure S21i. Simulated absorption spectra of 1-*PhP*, 2-*PhP* and 3-*PhP*.

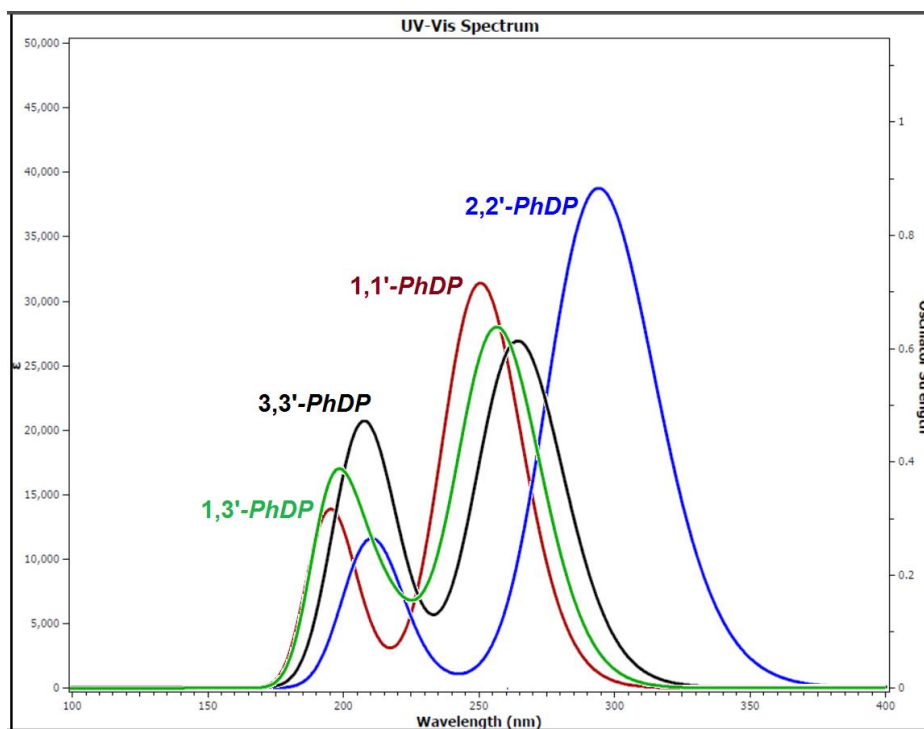

Figure S21j. Simulated absorption spectra of *PhDPs*.

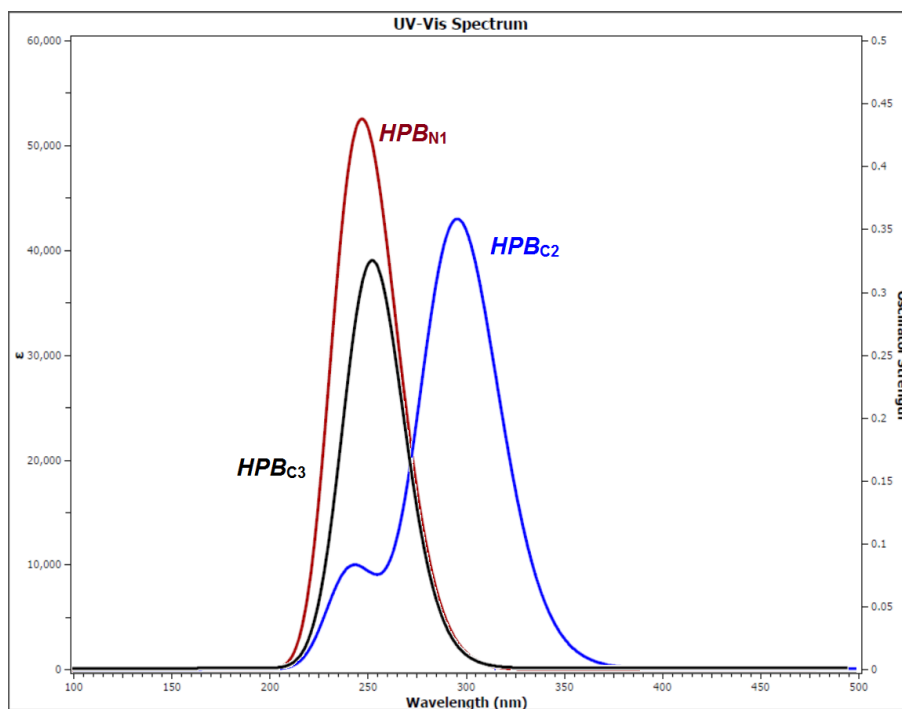

Figure S21k. Simulated absorption spectra of *HPBs*.

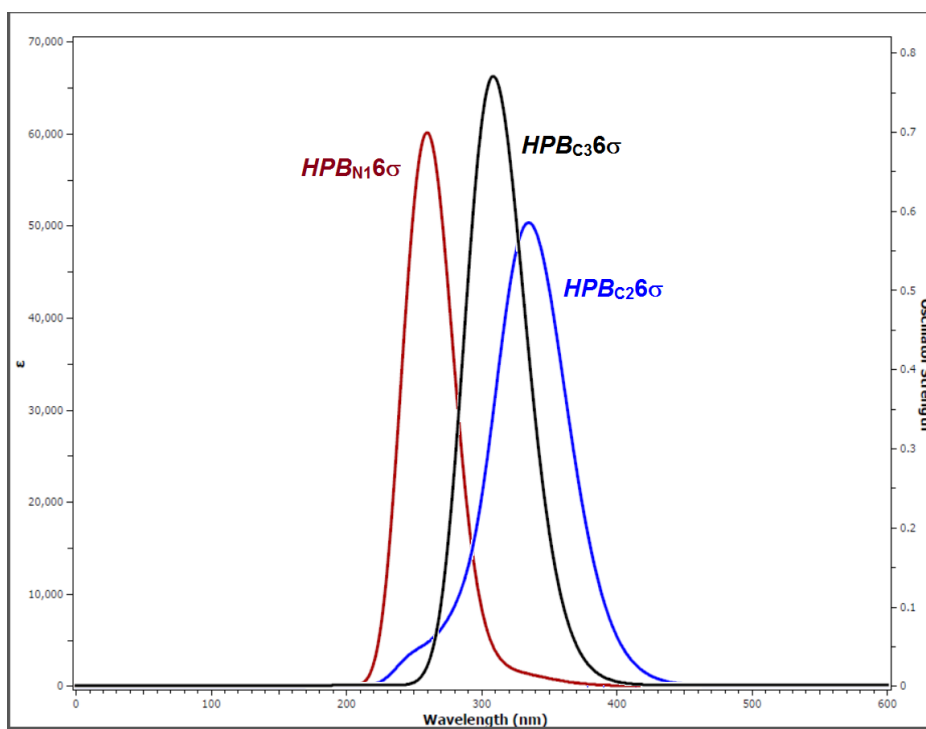

Figure S21l. Simulated absorption spectra of *HPB-6 $\sigma$* .

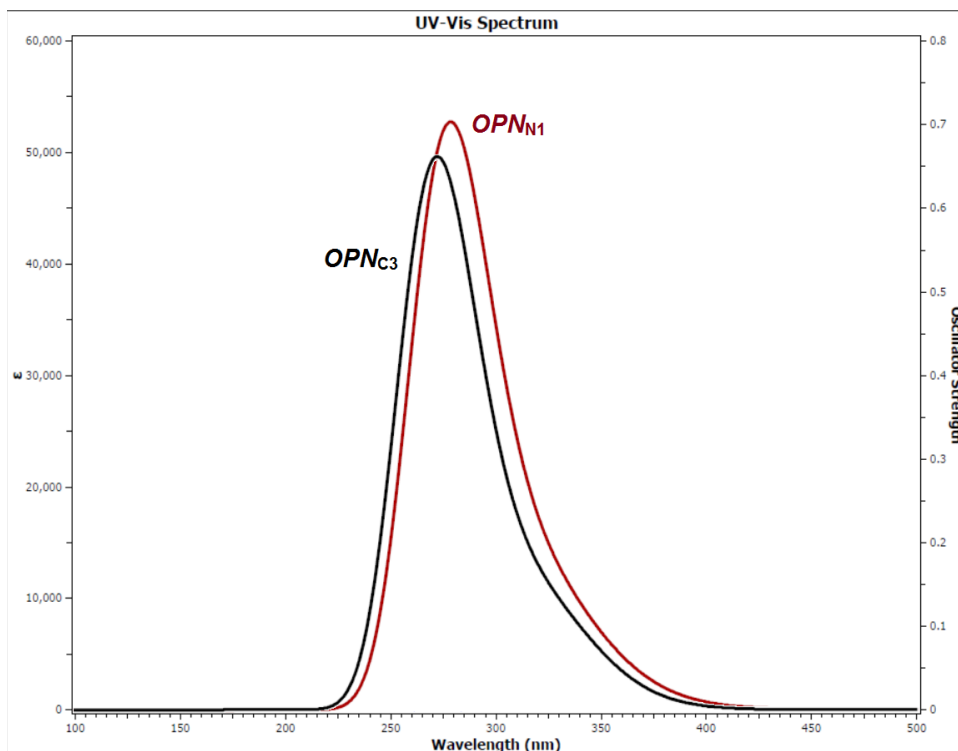

Figure S21m. Simulated absorption spectra of *OPN*.

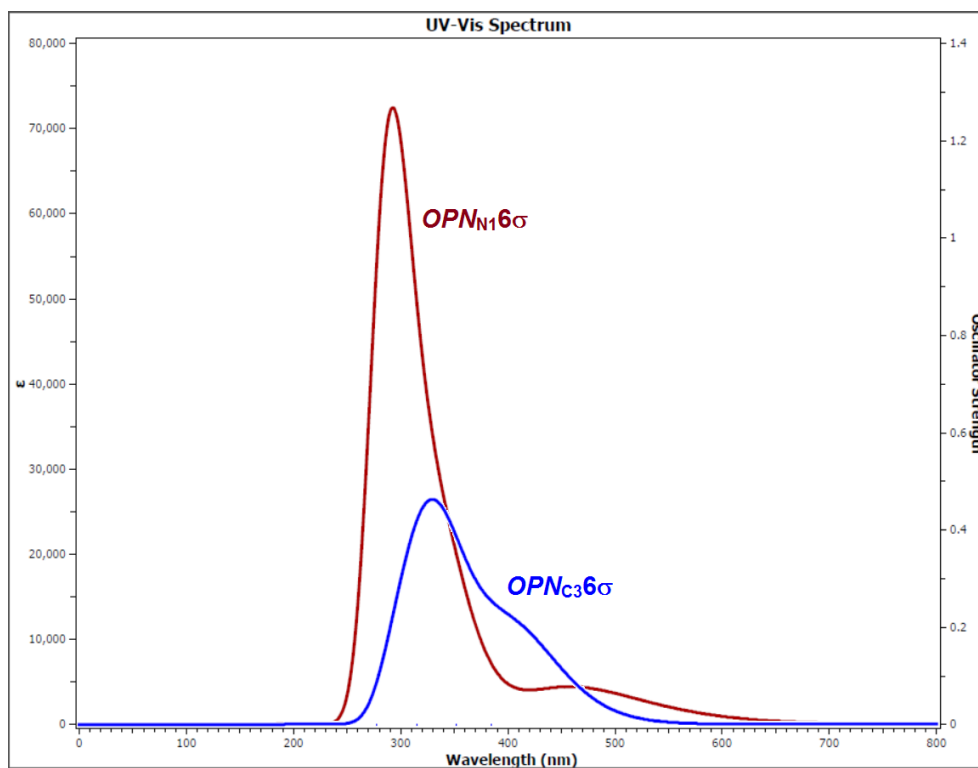

Figure S21n. Simulated absorption spectra of *OPN-6 $\sigma$* .

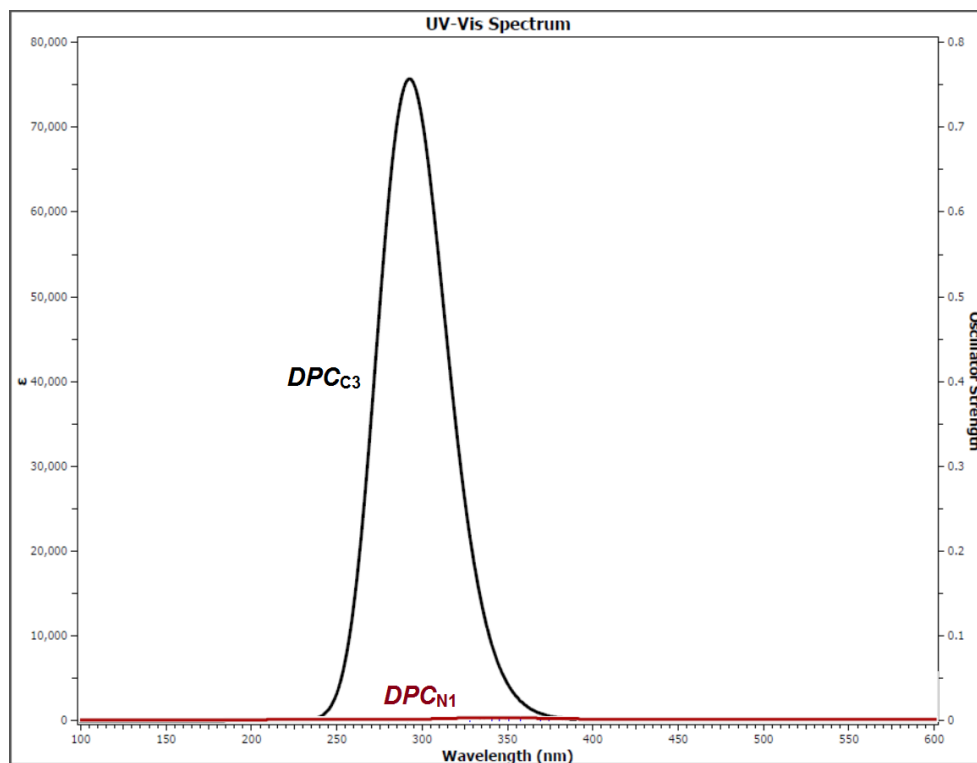

Figure S21o. Simulated absorption spectra of *DPC*.

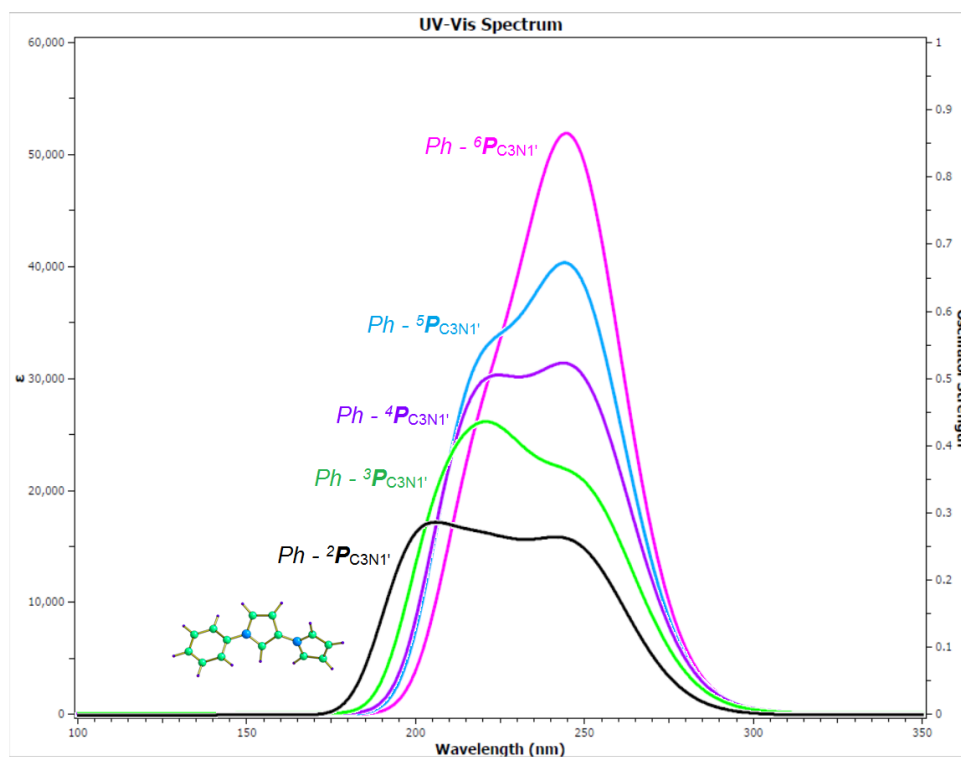

Figure S21p. Simulated absorption spectra of  $Ph - ^n P_{C3N1'}$  systems.



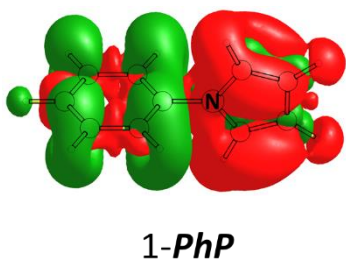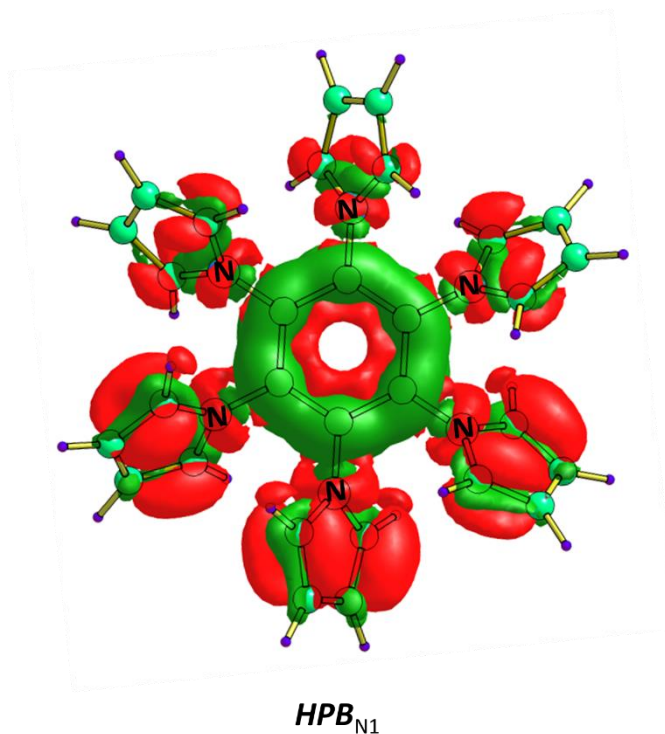

**Figure S22.** The difference in total density computed for the ground and excited states of 1-PhP and HPB<sub>N1</sub> systems plotted at iso-contour value 0.001 au.

**Table S3. Cartesian coordinates for all the systems (Given in the order Atomic number, x, y, z coordinates, respectively)**

|                                 |           |           |           |   |          |           |           |
|---------------------------------|-----------|-----------|-----------|---|----------|-----------|-----------|
| Pyrrole ( <i>P</i> )            |           |           |           |   |          |           |           |
| 6                               | 0.000000  | 0.711553  | -0.979918 | 1 | 0.000000 | 1.359481  | -1.841490 |
| 6                               | 0.000000  | 1.120834  | 0.330464  | 1 | 0.000000 | 2.107068  | 0.764107  |
| 7                               | 0.000000  | 0.000000  | 1.117812  | 1 | 0.000000 | -2.107068 | 0.764107  |
| 6                               | 0.000000  | -1.120834 | 0.330464  | 1 | 0.000000 | -1.359481 | -1.841490 |
| 6                               | 0.000000  | -0.711553 | -0.979918 | 1 | 0.000000 | 0.000000  | 2.123534  |
| <hr/>                           |           |           |           |   |          |           |           |
| <sup>2</sup> P <sub>C2C2'</sub> |           |           |           |   |          |           |           |
| 6                               | -1.560366 | 1.115201  | -0.317518 | 6 | 2.897720 | -0.657353 | -0.165784 |
| 6                               | -0.724089 | 0.053881  | -0.036671 | 6 | 2.839266 | 0.665182  | 0.197849  |
| 7                               | -1.518329 | -1.020118 | 0.271879  | 7 | 1.518325 | 1.020142  | 0.271784  |
| 6                               | -2.839272 | -0.665217 | 0.197713  | 6 | 0.724091 | -0.053889 | -0.036670 |
| 6                               | -2.897715 | 0.657387  | -0.165677 | 6 | 1.560371 | -1.115221 | -0.317460 |
| 1                               | -1.244307 | 2.094948  | -0.640663 | 1 | 3.798666 | -1.229116 | -0.318748 |
| 1                               | -3.620583 | -1.375589 | 0.410780  | 1 | 3.620572 | 1.375534  | 0.411004  |
| 1                               | -3.798656 | 1.229179  | -0.318556 | 1 | 1.244314 | -2.094981 | -0.640566 |

|                 |   |           |           |           |   |           |           |           |
|-----------------|---|-----------|-----------|-----------|---|-----------|-----------|-----------|
|                 | 1 | -1.164118 | -1.911692 | 0.578272  | 1 | 1.164104  | 1.911724  | 0.578142  |
| ${}^2P_{C3C3'}$ | 6 | -1.582953 | -1.127445 | 0.243552  | 6 | 2.880701  | 0.694673  | 0.144251  |
|                 | 6 | -0.730923 | -0.005785 | 0.005989  | 7 | 2.853657  | -0.643665 | -0.141161 |
|                 | 6 | -1.554733 | 1.072219  | -0.229679 | 6 | 1.554731  | -1.072205 | -0.229779 |
|                 | 7 | -2.853659 | 0.643657  | -0.141146 | 6 | 0.730923  | 0.005784  | 0.005966  |
|                 | 6 | -2.880699 | -0.694695 | 0.144202  | 6 | 1.582955  | 1.127465  | 0.243421  |
|                 | 1 | -1.268137 | -2.130779 | 0.484295  | 1 | 3.812673  | 1.222105  | 0.263124  |
|                 | 1 | -3.663682 | 1.224326  | -0.273743 | 1 | 3.663679  | -1.224343 | -0.273725 |
|                 | 1 | -3.812669 | -1.222149 | 0.262984  | 1 | 1.268139  | 2.130811  | 0.484113  |
|                 | 1 | -1.315798 | 2.095536  | -0.469152 | 1 | 1.315794  | -2.095515 | -0.469281 |
| ${}^2P_{N1N1'}$ | 6 | -1.469213 | 0.798905  | 0.797783  | 6 | 2.774449  | -0.504698 | 0.503758  |
|                 | 7 | -0.685090 | 0.000027  | -0.000072 | 6 | 2.774477  | 0.504667  | -0.503712 |
|                 | 6 | -1.469248 | -0.798937 | -0.797763 | 6 | 1.469250  | 0.798950  | -0.797748 |
|                 | 6 | -2.774476 | -0.504670 | -0.503714 | 7 | 0.685090  | -0.000026 | -0.000071 |
|                 | 6 | -2.774450 | 0.504686  | 0.503766  | 6 | 1.469212  | -0.798903 | 0.797787  |
|                 | 1 | -1.012307 | 1.489278  | 1.487538  | 1 | 3.637835  | -0.961394 | 0.959654  |
|                 | 1 | -3.637871 | -0.961274 | -0.959627 | 1 | 3.637873  | 0.961266  | -0.959629 |
|                 | 1 | -3.637837 | 0.961371  | 0.959671  | 1 | 1.012305  | -1.489273 | 1.487545  |
|                 | 1 | -1.012446 | -1.489354 | -1.487552 | 1 | 1.012448  | 1.489374  | -1.487529 |
| ${}^2P_{C2N1'}$ | 7 | -1.423192 | -0.945411 | -0.451284 | 6 | 2.836654  | 0.615978  | -0.324590 |
|                 | 6 | -0.683782 | 0.089989  | 0.052952  | 6 | 2.809267  | -0.662587 | 0.301406  |
|                 | 6 | -1.540788 | 1.057095  | 0.511103  | 6 | 1.493915  | -0.989304 | 0.508040  |
|                 | 6 | -2.861067 | 0.583220  | 0.264273  | 7 | 0.717181  | 0.041393  | 0.024968  |
|                 | 6 | -2.757596 | -0.652093 | -0.322787 | 6 | 1.536918  | 1.022407  | -0.483157 |
|                 | 1 | -1.029927 | -1.752253 | -0.908901 | 1 | 3.710188  | 1.169054  | -0.629780 |
|                 | 1 | -3.781538 | 1.088542  | 0.507220  | 1 | 3.658115  | -1.266428 | 0.579194  |
|                 | 1 | -3.513323 | -1.344475 | -0.653591 | 1 | 1.108181  | 1.906515  | -0.925782 |
|                 | 1 | -1.245446 | 1.978492  | 0.986184  | 1 | 1.034690  | -1.839557 | 0.986230  |
| ${}^2P_{C3N1'}$ | 6 | 1.467041  | -1.034203 | -0.388756 | 6 | -2.853394 | 0.662038  | -0.254742 |
|                 | 6 | 0.663040  | 0.008823  | 0.002083  | 6 | -2.851917 | -0.671241 | 0.242115  |

|   |          |           |           |   |           |           |           |
|---|----------|-----------|-----------|---|-----------|-----------|-----------|
| 6 | 1.498392 | 1.087269  | 0.401646  | 6 | -1.540633 | -1.046438 | 0.396961  |
| 6 | 2.793864 | 0.662355  | 0.240669  | 7 | -0.744661 | 0.004342  | 0.010363  |
| 7 | 2.763709 | -0.621505 | -0.227379 | 6 | -1.543035 | 1.048547  | -0.387767 |
| 1 | 1.215521 | -2.007715 | -0.774472 | 1 | -3.714848 | 1.265123  | -0.492404 |
| 1 | 3.726529 | 1.165919  | 0.432654  | 1 | -3.712046 | -1.278812 | 0.473316  |
| 1 | 3.573664 | -1.180470 | -0.434802 | 1 | -1.101262 | 1.961031  | -0.753818 |
| 1 | 1.175984 | 2.044412  | 0.778320  | 1 | -1.097022 | -1.952246 | 0.777063  |

${}^2P_{C3C2'}$

|   |           |           |           |   |          |           |           |
|---|-----------|-----------|-----------|---|----------|-----------|-----------|
| 6 | -1.523795 | -1.090192 | 0.338480  | 6 | 2.944882 | 0.626702  | 0.177394  |
| 6 | -0.704851 | 0.035785  | 0.015452  | 6 | 2.847386 | -0.685571 | -0.213441 |
| 6 | -1.556117 | 1.066862  | -0.313427 | 7 | 1.514857 | -0.997447 | -0.293115 |
| 7 | -2.840178 | 0.608857  | -0.191018 | 6 | 0.751308 | 0.096500  | 0.031003  |
| 6 | -2.832407 | -0.702584 | 0.199091  | 6 | 1.620919 | 1.121844  | 0.335612  |
| 1 | -1.186031 | -2.059017 | 0.672547  | 1 | 3.863108 | 1.166575  | 0.344262  |
| 1 | -3.665979 | 1.151890  | -0.377689 | 1 | 3.606574 | -1.416362 | -0.437547 |
| 1 | -3.749886 | -1.244723 | 0.357093  | 1 | 1.328544 | 2.105655  | 0.667399  |
| 1 | -1.339777 | 2.071382  | -0.637835 | 1 | 1.136740 | -1.871338 | -0.620273 |

${}^3P_{C3N1'}$

|   |           |           |           |   |           |           |           |
|---|-----------|-----------|-----------|---|-----------|-----------|-----------|
| 6 | -0.658251 | 1.637827  | 0.586447  | 1 | -5.455996 | 0.265328  | -0.811961 |
| 7 | -1.065287 | 0.400803  | 0.159597  | 1 | -2.396987 | -2.093302 | 0.831995  |
| 6 | 0.037195  | -0.368694 | -0.123396 | 1 | -3.411277 | 1.734992  | -0.945157 |
| 6 | 1.149277  | 0.392501  | 0.143796  | 6 | 3.506683  | 0.745041  | -0.503738 |
| 6 | 0.714534  | 1.668326  | 0.592280  | 7 | 2.486393  | -0.023990 | -0.000501 |
| 1 | -1.384385 | 2.373813  | 0.890410  | 6 | 2.977604  | -1.265907 | 0.320358  |
| 1 | -0.060776 | -1.362724 | -0.527169 | 6 | 4.316653  | -1.289360 | 0.018485  |
| 6 | -4.267529 | -1.253277 | 0.049247  | 6 | 4.653576  | -0.009543 | -0.503988 |
| 7 | -4.550960 | -0.027325 | -0.484706 | 1 | 3.313526  | 1.750784  | -0.839745 |
| 6 | -3.417759 | 0.740401  | -0.532180 | 1 | 4.981480  | -2.124650 | 0.169080  |
| 6 | -2.401865 | -0.014922 | 0.001002  | 1 | 5.622366  | 0.317710  | -0.845581 |
| 6 | -2.933174 | -1.280098 | 0.370289  | 1 | 2.332018  | -2.006228 | 0.764009  |
| 1 | -5.032954 | -2.001521 | 0.169193  | 1 | 1.340302  | 2.485606  | 0.912591  |

${}^4P_{C3N1'}$

|   |          |           |          |   |           |           |           |
|---|----------|-----------|----------|---|-----------|-----------|-----------|
| 6 | 2.375835 | -1.602154 | 0.662714 | 7 | -0.699950 | 0.259882  | 0.413109  |
| 7 | 2.810970 | -0.396007 | 0.179376 | 6 | -1.069373 | 1.526662  | 0.782025  |
| 6 | 1.736586 | 0.442572  | 0.012270 | 6 | -2.429331 | 1.646787  | 0.632666  |
| 6 | 0.615580 | -0.244291 | 0.411128 | 6 | -2.894407 | 0.395420  | 0.147700  |
| 6 | 1.013145 | -1.543987 | 0.821975 | 1 | -1.735431 | -1.444331 | -0.369620 |
| 1 | 3.082537 | -2.382987 | 0.891105 | 1 | -3.031462 | 2.507913  | 0.873544  |

|   |           |           |           |   |           |           |           |
|---|-----------|-----------|-----------|---|-----------|-----------|-----------|
| 1 | 1.852281  | 1.425974  | -0.412371 | 1 | -0.334357 | 2.218397  | 1.159546  |
| 6 | 6.082798  | 1.042388  | -0.300198 | 1 | 0.376025  | -2.318260 | 1.217800  |
| 7 | 6.220254  | -0.196196 | -0.861854 | 6 | -5.135505 | 0.889994  | -0.765790 |
| 6 | 5.040940  | -0.886676 | -0.777648 | 7 | -4.231751 | 0.064371  | -0.143810 |
| 6 | 4.146040  | -0.068708 | -0.132019 | 6 | -4.837478 | -1.137341 | 0.130220  |
| 6 | 4.799041  | 1.155911  | 0.172379  | 6 | -6.132878 | -1.078438 | -0.320994 |
| 1 | 6.905300  | 1.737144  | -0.269987 | 6 | -6.323023 | 0.211995  | -0.889174 |
| 1 | 7.060299  | -0.546275 | -1.290575 | 1 | -4.838945 | 1.875480  | -1.086090 |
| 1 | 4.375199  | 1.999920  | 0.691971  | 1 | -6.864474 | -1.866165 | -0.239438 |
| 1 | 4.920462  | -1.876043 | -1.185715 | 1 | -7.223439 | 0.596257  | -1.340816 |
| 6 | -1.812023 | -0.440211 | 0.013188  | 1 | -4.296337 | -1.910911 | 0.650243  |

${}^5P_{C3N1}$

|   |           |           |           |   |           |           |           |
|---|-----------|-----------|-----------|---|-----------|-----------|-----------|
| 6 | 4.256967  | 1.638287  | 0.328213  | 1 | 0.053055  | 1.419512  | 0.858788  |
| 7 | 4.556926  | 0.318131  | 0.116444  | 1 | -1.336497 | -1.092288 | -2.399429 |
| 6 | 3.420585  | -0.353005 | -0.260974 | 1 | 1.388533  | -0.998022 | -2.317179 |
| 6 | 2.398418  | 0.564120  | -0.300162 | 1 | 2.383344  | 2.763148  | 0.117326  |
| 6 | 2.920666  | 1.829494  | 0.076085  | 6 | -3.496332 | -0.377326 | -0.246691 |
| 1 | 5.032883  | 2.334983  | 0.599904  | 7 | -2.489814 | 0.555293  | -0.298676 |
| 1 | 3.424879  | -1.418096 | -0.423465 | 6 | -2.992950 | 1.785261  | 0.035142  |
| 6 | 7.658903  | -1.513380 | -0.050419 | 6 | -4.328750 | 1.647802  | 0.323643  |
| 7 | 7.802155  | -0.795618 | 1.104081  | 6 | -4.642166 | 0.274455  | 0.141249  |
| 6 | 6.684141  | -0.039228 | 1.332157  | 1 | -3.312272 | -1.414360 | -0.473499 |
| 6 | 5.824792  | -0.274485 | 0.286754  | 1 | -5.006094 | 2.427023  | 0.633743  |
| 6 | 6.435330  | -1.208544 | -0.592646 | 1 | -2.356297 | 2.654496  | 0.019770  |
| 1 | 8.436853  | -2.171064 | -0.400202 | 6 | -6.129308 | -1.541055 | 0.928238  |
| 1 | 8.605061  | -0.829069 | 1.709350  | 7 | -5.903136 | -0.321896 | 0.337992  |
| 1 | 6.026556  | -1.586509 | -1.515693 | 6 | -7.104940 | 0.219872  | -0.045611 |
| 1 | 6.575222  | 0.582002  | 2.205161  | 6 | -8.102475 | -0.657598 | 0.301367  |
| 6 | -0.041365 | 0.789284  | -0.009959 | 6 | -7.481587 | -1.778931 | 0.918791  |
| 7 | 1.062154  | 0.290171  | -0.655613 | 1 | -5.306240 | -2.111041 | 1.327540  |
| 6 | 0.659537  | -0.535593 | -1.672265 | 1 | -9.156560 | -0.513890 | 0.126246  |
| 6 | -0.713366 | -0.564502 | -1.695600 | 1 | -7.970207 | -2.651360 | 1.321993  |
| 6 | -1.150421 | 0.280416  | -0.641655 | 1 | -7.134288 | 1.169908  | -0.553889 |

${}^6P_{C3N1}$

|   |          |           |           |   |           |           |           |
|---|----------|-----------|-----------|---|-----------|-----------|-----------|
| 6 | 6.046587 | 1.622657  | 0.225416  | 6 | -1.740348 | -0.299226 | -0.187014 |
| 7 | 6.322898 | 0.288298  | 0.081516  | 7 | -0.722508 | 0.614898  | -0.294047 |
| 6 | 5.172767 | -0.382477 | -0.251236 | 6 | -1.206391 | 1.867960  | -0.024235 |
| 6 | 4.165607 | 0.548516  | -0.331053 | 6 | -2.542261 | 1.765896  | 0.278455  |
| 6 | 4.711527 | 1.822999  | -0.026304 | 6 | -2.874028 | 0.389549  | 0.171641  |
| 1 | 6.836166 | 2.319521  | 0.453846  | 1 | -1.572702 | -1.349199 | -0.361074 |
| 1 | 5.158137 | -1.454507 | -0.358076 | 1 | -3.206944 | 2.570330  | 0.549084  |
| 6 | 9.389926 | -1.606327 | -0.007494 | 1 | -0.557925 | 2.726037  | -0.089698 |

|   |           |           |           |   |            |           |           |
|---|-----------|-----------|-----------|---|------------|-----------|-----------|
| 7 | 9.559117  | -0.823591 | 1.100238  | 6 | -4.380246  | -1.347194 | 1.083290  |
| 6 | 8.457526  | -0.034392 | 1.294170  | 7 | -4.142033  | -0.179689 | 0.407470  |
| 6 | 7.582167  | -0.316052 | 0.273808  | 6 | -5.333384  | 0.342612  | -0.032717 |
| 6 | 8.165766  | -1.312086 | -0.554288 | 6 | -6.332818  | -0.502577 | 0.385888  |
| 1 | 10.151929 | -2.298042 | -0.325262 | 6 | -5.734145  | -1.579252 | 1.092465  |
| 1 | 10.368498 | -0.835123 | 1.697690  | 1 | -3.565324  | -1.889047 | 1.534553  |
| 1 | 7.740005  | -1.737059 | -1.448754 | 1 | -6.245672  | -2.396466 | 1.574789  |
| 1 | 8.369963  | 0.639973  | 2.129325  | 1 | -5.366013  | 1.234878  | -0.635641 |
| 6 | 1.731840  | 0.823695  | -0.033194 | 6 | -8.591887  | -1.325630 | -0.181294 |
| 7 | 2.822129  | 0.278365  | -0.662851 | 7 | -7.710982  | -0.327288 | 0.153622  |
| 6 | 2.399387  | -0.586666 | -1.637756 | 6 | -8.386661  | 0.866920  | 0.207424  |
| 6 | 1.026026  | -0.595617 | -1.650243 | 6 | -9.704496  | 0.629398  | -0.096554 |
| 6 | 0.610588  | 0.303386  | -0.633321 | 6 | -9.835421  | -0.765785 | -0.341912 |
| 1 | 1.842762  | 1.492355  | 0.804342  | 1 | -8.243857  | -2.338834 | -0.299684 |
| 1 | 0.389712  | -1.145064 | -2.325123 | 1 | -10.487397 | 1.370105  | -0.125937 |
| 1 | 3.116457  | -1.089121 | -2.265858 | 1 | -10.734780 | -1.296100 | -0.610843 |
| 1 | 4.190327  | 2.766649  | -0.031099 | 1 | -7.869459  | 1.769902  | 0.488122  |

${}^3P_{C3C2'}$

|   |           |           |           |   |           |           |           |
|---|-----------|-----------|-----------|---|-----------|-----------|-----------|
| 6 | -2.848067 | -0.174124 | -0.529768 | 6 | 0.749681  | 1.118829  | 0.001392  |
| 6 | -1.550160 | -0.082848 | 0.064101  | 1 | 2.107732  | 2.896057  | -0.016046 |
| 6 | -1.335150 | -1.266046 | 0.738734  | 1 | -0.226664 | 4.291122  | 0.002016  |
| 7 | -2.439893 | -2.053387 | 0.566241  | 1 | -2.076922 | 2.583779  | 0.066947  |
| 6 | -3.368569 | -1.399375 | -0.197464 | 6 | 2.471589  | -2.018768 | -0.651446 |
| 1 | -3.326549 | 0.565811  | -1.152735 | 7 | 1.456904  | -1.112917 | -0.809717 |
| 1 | -2.554765 | -2.974114 | 0.955307  | 6 | 1.679887  | -0.006533 | -0.029132 |
| 1 | -4.309594 | -1.858876 | -0.450159 | 6 | 2.873223  | -0.211910 | 0.631904  |
| 1 | -0.485512 | -1.590360 | 1.318427  | 6 | 3.372349  | -1.484291 | 0.237980  |
| 6 | 1.104737  | 2.500618  | 0.008223  | 1 | 2.475141  | -2.953564 | -1.187320 |
| 6 | -0.057385 | 3.227236  | 0.006776  | 1 | 0.643799  | -1.229603 | -1.393701 |
| 7 | -1.102576 | 2.341218  | -0.007478 | 1 | 4.284997  | -1.953954 | 0.568261  |
| 6 | -0.634067 | 1.051084  | 0.004135  | 1 | 3.318887  | 0.476066  | 1.333074  |

${}^4P_{C3C2'}$

|   |           |           |           |   |           |           |           |
|---|-----------|-----------|-----------|---|-----------|-----------|-----------|
| 6 | 3.654832  | -0.229626 | 0.833869  | 6 | -0.570772 | 2.595293  | -1.803843 |
| 6 | 2.290194  | -0.080482 | 0.434580  | 7 | 0.186012  | 1.461749  | -1.906998 |
| 6 | 1.857812  | 1.135798  | 0.924186  | 6 | -0.376753 | 0.443748  | -1.175356 |
| 7 | 2.902805  | 1.707861  | 1.592622  | 6 | -1.530873 | 0.943480  | -0.594144 |
| 6 | 3.998823  | 0.889647  | 1.547861  | 6 | -1.645987 | 2.307975  | -1.002156 |
| 1 | 4.316865  | -1.050173 | 0.603355  | 1 | -0.296299 | 3.501949  | -2.317268 |
| 1 | 2.864004  | 2.599833  | 2.056679  | 1 | 1.057943  | 1.370976  | -2.402935 |
| 1 | 4.928186  | 1.170416  | 2.014487  | 1 | -2.433992 | 2.992389  | -0.730877 |
| 1 | 0.894313  | 1.617110  | 0.851473  | 6 | -2.443570 | 0.254703  | 0.308804  |
| 6 | -0.078420 | -2.118195 | -1.551093 | 7 | -2.209242 | -1.010610 | 0.787582  |

|   |           |           |           |   |           |           |          |
|---|-----------|-----------|-----------|---|-----------|-----------|----------|
| 6 | 0.868298  | -3.027690 | -1.154028 | 6 | -4.129312 | -0.363127 | 1.686757 |
| 7 | 1.814410  | -2.353426 | -0.422634 | 6 | -3.637367 | 0.680448  | 0.857620 |
| 6 | 1.488365  | -1.026586 | -0.327701 | 1 | -1.405841 | -1.569270 | 0.541170 |
| 6 | 0.308858  | -0.844368 | -1.032575 | 1 | -4.103195 | 1.635968  | 0.675009 |
| 1 | -0.949360 | -2.319993 | -2.154879 | 1 | -5.041162 | -0.359094 | 2.262049 |
| 1 | 0.954523  | -4.085652 | -1.337787 | 6 | -3.224722 | -1.394879 | 1.621540 |
| 1 | 2.599076  | -2.777573 | 0.044757  | 1 | -3.219386 | -2.362753 | 2.094831 |

${}^5P_{C3C2'}$

|   |           |           |           |   |           |           |           |
|---|-----------|-----------|-----------|---|-----------|-----------|-----------|
| 6 | 4.808544  | -0.522838 | -0.746158 | 6 | -1.066138 | -1.763497 | 0.706267  |
| 6 | 3.435375  | -0.363781 | -0.381286 | 1 | -0.090565 | -3.426128 | 1.826873  |
| 6 | 2.734243  | -1.378898 | -1.002363 | 1 | 1.767432  | -1.747256 | 2.169299  |
| 7 | 3.630054  | -2.125478 | -1.714528 | 1 | -2.004071 | -2.171486 | 0.366170  |
| 6 | 4.891781  | -1.616625 | -1.569402 | 6 | -1.239372 | 0.601845  | -0.322254 |
| 1 | 5.643961  | 0.078882  | -0.422594 | 7 | -0.500507 | 1.569237  | -0.958154 |
| 1 | 3.390095  | -2.931834 | -2.266556 | 6 | -2.599472 | 1.944206  | -1.541274 |
| 1 | 5.740211  | -2.074032 | -2.050295 | 6 | -2.566632 | 0.816069  | -0.665298 |
| 1 | 1.680357  | -1.613249 | -0.990016 | 1 | 0.499771  | 1.660234  | -0.859601 |
| 6 | 1.557642  | 2.022478  | 1.738564  | 1 | -3.481671 | 2.400359  | -1.963456 |
| 6 | 2.725785  | 2.687054  | 1.469627  | 6 | -1.310089 | 2.384726  | -1.697220 |
| 7 | 3.511159  | 1.861686  | 0.702565  | 1 | -0.908409 | 3.213057  | -2.256799 |
| 6 | 2.864447  | 0.677943  | 0.461427  | 6 | -3.737583 | 0.071573  | -0.212122 |
| 6 | 1.639416  | 0.744262  | 1.108608  | 7 | -4.772036 | -0.199987 | -1.075852 |
| 1 | 0.728542  | 2.389697  | 2.322231  | 6 | -5.377251 | -1.041791 | 0.879764  |
| 1 | 3.065918  | 3.666580  | 1.761711  | 6 | -4.096620 | -0.438749 | 1.017473  |
| 1 | 4.406574  | 2.107909  | 0.313452  | 1 | -4.753493 | 0.021992  | -2.057816 |
| 6 | -0.112819 | -2.420210 | 1.441266  | 1 | -3.497646 | -0.370830 | 1.912000  |
| 7 | 0.911604  | -1.544365 | 1.678354  | 1 | -5.950443 | -1.529415 | 1.652107  |
| 6 | 0.642235  | -0.329852 | 1.100081  | 6 | -5.769805 | -0.878449 | -0.426540 |
| 6 | -0.595848 | -0.431768 | 0.483816  | 1 | -6.665516 | -1.184312 | -0.941269 |

${}^6P_{C3C2'}$

|   |          |           |           |   |           |           |           |
|---|----------|-----------|-----------|---|-----------|-----------|-----------|
| 6 | 5.412775 | 1.691305  | -0.284219 | 6 | -0.286792 | -0.526660 | 0.665163  |
| 6 | 4.172248 | 0.984006  | -0.217135 | 7 | 0.312991  | -0.080257 | 1.815308  |
| 6 | 3.265099 | 1.688880  | -0.983590 | 6 | -1.861591 | -0.113148 | 2.243677  |
| 7 | 3.913356 | 2.776030  | -1.497132 | 6 | -1.653031 | -0.564497 | 0.906877  |
| 6 | 5.216221 | 2.791368  | -1.079499 | 1 | 1.311068  | 0.019134  | 1.924594  |
| 1 | 6.348421 | 1.412821  | 0.175864  | 1 | -2.815735 | -0.016371 | 2.736598  |
| 1 | 3.486747 | 3.467110  | -2.091425 | 6 | -0.631420 | 0.173441  | 2.774836  |
| 1 | 5.894526 | 3.570029  | -1.385917 | 1 | -0.349901 | 0.529862  | 3.751811  |
| 1 | 2.222387 | 1.498112  | -1.188484 | 6 | -2.676566 | -1.033242 | -0.024221 |
| 6 | 3.024044 | -2.120963 | 1.442045  | 7 | -2.537892 | -2.228129 | -0.685043 |
| 6 | 4.135388 | -1.767702 | 2.162475  | 6 | -4.466731 | -1.391235 | -1.364586 |
| 7 | 4.656161 | -0.629112 | 1.598161  | 6 | -3.883202 | -0.483749 | -0.426741 |

|   |           |           |           |   |           |           |           |
|---|-----------|-----------|-----------|---|-----------|-----------|-----------|
| 6 | 3.892376  | -0.233006 | 0.532219  | 1 | -1.723678 | -2.815939 | -0.598420 |
| 6 | 2.865840  | -1.156509 | 0.401381  | 1 | -5.393448 | -1.258479 | -1.901781 |
| 1 | 2.387696  | -2.973050 | 1.620942  | 6 | -3.608045 | -2.452874 | -1.504202 |
| 1 | 4.600649  | -2.229350 | 3.017359  | 1 | -3.672007 | -3.337902 | -2.115120 |
| 1 | 5.443880  | -0.111752 | 1.953028  | 6 | -4.444772 | 0.793040  | -0.003637 |
| 6 | 1.034023  | -0.984151 | -2.731794 | 7 | -5.803688 | 0.998954  | -0.008093 |
| 7 | 2.142222  | -1.201893 | -1.959653 | 6 | -3.860388 | 1.968334  | 0.421639  |
| 6 | 1.826035  | -1.092229 | -0.629162 | 6 | -6.094040 | 2.271041  | 0.412096  |
| 6 | 0.471545  | -0.805670 | -0.550138 | 6 | -4.903279 | 2.898778  | 0.684269  |
| 6 | -0.022556 | -0.738854 | -1.892025 | 1 | -6.480263 | 0.284701  | -0.220947 |
| 1 | 1.081871  | -1.031572 | -3.807183 | 1 | -2.798762 | 2.129013  | 0.522837  |
| 1 | 3.077053  | -1.371570 | -2.294804 | 1 | -7.111645 | 2.617784  | 0.482715  |
| 1 | -1.037171 | -0.520912 | -2.188721 | 1 | -4.792818 | 3.914946  | 1.027845  |

### 1-PhP

|   |          |           |           |   |           |          |           |
|---|----------|-----------|-----------|---|-----------|----------|-----------|
| 6 | 0.000000 | 0.710936  | 3.110009  | 6 | 1.208709  | 0.000000 | -1.112236 |
| 6 | 0.000000 | 1.119691  | 1.798704  | 6 | -1.208709 | 0.000000 | -1.112236 |
| 7 | 0.000000 | 0.000000  | 1.003743  | 6 | 1.205605  | 0.000000 | -2.503086 |
| 6 | 0.000000 | -1.119691 | 1.798704  | 6 | -1.205605 | 0.000000 | -2.503086 |
| 6 | 0.000000 | -0.710936 | 3.110009  | 6 | 0.000000  | 0.000000 | -3.197938 |
| 1 | 0.000000 | 1.360137  | 3.970765  | 1 | 2.134904  | 0.000000 | -0.549806 |
| 1 | 0.000000 | 2.101963  | 1.354318  | 1 | -2.134904 | 0.000000 | -0.549806 |
| 1 | 0.000000 | -2.101963 | 1.354318  | 1 | 2.144732  | 0.000000 | -3.043078 |
| 1 | 0.000000 | -1.360137 | 3.970765  | 1 | -2.144732 | 0.000000 | -3.043078 |
| 6 | 0.000000 | 0.000000  | -0.423728 | 1 | 0.000000  | 0.000000 | -4.281292 |

### 2-PhP

|   |           |           |          |   |           |           |           |
|---|-----------|-----------|----------|---|-----------|-----------|-----------|
| 6 | 0.847011  | 3.075394  | 0.000000 | 6 | -0.077704 | -1.166240 | 1.203883  |
| 7 | 1.105985  | 1.729572  | 0.000000 | 6 | -0.077704 | -1.166240 | -1.203883 |
| 6 | -0.070796 | 1.022574  | 0.000000 | 6 | -0.077704 | -2.557185 | 1.204191  |
| 6 | -1.097489 | 1.937478  | 0.000000 | 6 | -0.077704 | -2.557185 | -1.204191 |
| 6 | -0.515562 | 3.237207  | 0.000000 | 6 | -0.076748 | -3.254135 | 0.000000  |
| 1 | 1.646688  | 3.797431  | 0.000000 | 1 | -0.085160 | -0.616163 | 2.138077  |
| 1 | 2.019587  | 1.305779  | 0.000000 | 1 | -0.085160 | -0.616163 | -2.138077 |
| 1 | -2.147447 | 1.691035  | 0.000000 | 1 | -0.081251 | -3.096480 | 2.144058  |
| 1 | -1.037530 | 4.180550  | 0.000000 | 1 | -0.081251 | -3.096480 | -2.144058 |
| 6 | -0.077571 | -0.458129 | 0.000000 | 1 | -0.078546 | -4.337735 | 0.000000  |

### 3-PhP

|   |           |          |          |   |           |           |           |
|---|-----------|----------|----------|---|-----------|-----------|-----------|
| 7 | 0.664196  | 3.117571 | 0.000000 | 6 | -0.002176 | -1.193577 | 1.201926  |
| 6 | 1.099972  | 1.818767 | 0.000000 | 6 | -0.002176 | -1.193577 | -1.201926 |
| 6 | -0.004906 | 1.000521 | 0.000000 | 6 | -0.002176 | -2.584669 | 1.203012  |
| 6 | -1.151236 | 1.849905 | 0.000000 | 6 | -0.002176 | -2.584669 | -1.203012 |
| 6 | -0.704134 | 3.147792 | 0.000000 | 6 | -0.001947 | -3.283479 | 0.000000  |
| 1 | 1.261076  | 3.927091 | 0.000000 | 1 | -0.003416 | -0.644727 | 2.136946  |

|                  |           |           |           |   |           |           |           |
|------------------|-----------|-----------|-----------|---|-----------|-----------|-----------|
| 1                | 2.149467  | 1.573343  | 0.000000  | 1 | -0.003416 | -0.644727 | -2.136946 |
| 1                | -2.180964 | 1.529123  | 0.000000  | 1 | -0.002326 | -3.122977 | 2.143680  |
| 1                | -1.242501 | 4.081109  | 0.000000  | 1 | -0.002326 | -3.122977 | -2.143680 |
| 6                | 0.000448  | -0.482206 | 0.000000  | 1 | -0.001921 | -4.367104 | 0.000000  |
| <b>1,1'-PhDP</b> |           |           |           |   |           |           |           |
| 6                | 4.916996  | -0.682587 | 0.202449  | 6 | -1.393899 | 0.000003  | -0.000009 |
| 6                | 3.608803  | -1.074491 | 0.315902  | 1 | 1.238196  | 1.970895  | 0.834853  |
| 7                | 2.807682  | 0.000001  | 0.000008  | 1 | 1.238199  | -1.970902 | -0.834834 |
| 6                | 3.608799  | 1.074493  | -0.315897 | 1 | -1.238180 | 1.970897  | 0.834849  |
| 6                | 4.916994  | 0.682589  | -0.202465 | 1 | -1.238176 | -1.970904 | -0.834837 |
| 1                | 5.777705  | -1.300782 | 0.400364  | 6 | -4.917014 | -0.682565 | 0.202498  |
| 1                | 3.172908  | -2.007347 | 0.633900  | 6 | -3.608805 | -1.074469 | 0.315947  |
| 1                | 3.172897  | 2.007350  | -0.633883 | 7 | -2.807685 | -0.000005 | -0.000010 |
| 1                | 5.777699  | 1.300784  | -0.400391 | 6 | -3.608804 | 1.074473  | -0.315942 |
| 6                | 1.393914  | -0.000001 | 0.000003  | 6 | -4.917012 | 0.682568  | -0.202498 |
| 6                | 0.693570  | 1.117680  | 0.449436  | 1 | -5.777727 | -1.300755 | 0.400412  |
| 6                | 0.693573  | -1.117683 | -0.449427 | 1 | -3.172896 | -2.007299 | 0.633996  |
| 6                | -0.693557 | 1.117684  | 0.449429  | 1 | -3.172886 | 2.007292  | -0.634007 |
| 6                | -0.693556 | -1.117685 | -0.449426 | 1 | -5.777730 | 1.300750  | -0.400418 |
| <b>2,2'-PhDP</b> |           |           |           |   |           |           |           |
| 6                | -4.975664 | -0.694861 | -0.151348 | 6 | 1.413111  | -0.037406 | -0.004989 |
| 7                | -3.648106 | -1.021447 | -0.216273 | 1 | -1.181749 | 2.078307  | -0.620822 |
| 6                | -2.874840 | 0.091395  | 0.011559  | 1 | -1.268984 | -2.017195 | 0.644431  |
| 6                | -3.738879 | 1.142840  | 0.241928  | 1 | 1.269032  | 2.017291  | -0.644055 |
| 6                | -5.064417 | 0.644542  | 0.140483  | 1 | 1.181712  | -2.078204 | 0.621241  |
| 1                | -5.740745 | -1.434237 | -0.320571 | 6 | 5.064295  | -0.644693 | -0.140796 |
| 1                | -3.285961 | -1.918163 | -0.496613 | 6 | 3.738752  | -1.142934 | -0.241673 |
| 1                | -3.443323 | 2.149227  | 0.493647  | 6 | 2.874839  | -0.091315 | -0.011463 |
| 1                | -5.977962 | 1.200684  | 0.275333  | 7 | 3.648220  | 1.021470  | 0.215953  |
| 6                | -1.413101 | 0.037459  | 0.005216  | 6 | 4.975765  | 0.694785  | 0.150747  |
| 6                | -0.665243 | 1.170866  | -0.330079 | 1 | 5.977770  | -1.200714 | -0.275938 |
| 6                | -0.720335 | -1.133880 | 0.335057  | 1 | 3.442861  | -2.149244 | -0.493310 |
| 6                | 0.720328  | 1.133984  | -0.334764 | 1 | 3.286294  | 1.917764  | 0.497915  |
| 6                | 0.665263  | -1.170768 | 0.330384  | 1 | 5.741007  | 1.434243  | 0.319403  |
| <b>3,3'-PhDP</b> |           |           |           |   |           |           |           |
| 7                | 5.003150  | -0.649984 | 0.165434  | 6 | -1.415977 | 0.003055  | -0.016193 |
| 6                | 3.704655  | -1.073127 | 0.246986  | 1 | 1.229431  | 2.047288  | 0.616202  |
| 6                | 2.885627  | 0.006481  | -0.005961 | 1 | 1.228378  | -2.034857 | -0.673454 |
| 6                | 3.743739  | 1.123656  | -0.244758 | 1 | -1.229412 | 2.047263  | 0.616237  |
| 6                | 5.038173  | 0.686068  | -0.133739 | 1 | -1.228334 | -2.034854 | -0.673488 |
| 1                | 5.809993  | -1.229689 | 0.321767  | 7 | -5.003203 | -0.649939 | 0.165503  |
| 1                | 3.461730  | -2.090950 | 0.505591  | 6 | -3.704698 | -1.073071 | 0.247158  |



|   |           |           |           |   |           |           |           |
|---|-----------|-----------|-----------|---|-----------|-----------|-----------|
| 1 | 3.436265  | 2.125612  | -0.499675 | 6 | -2.885621 | 0.006461  | -0.005940 |
| 1 | 5.973433  | 1.207389  | -0.253260 | 6 | -3.743721 | 1.123643  | -0.244720 |
| 6 | 1.416002  | 0.003070  | -0.016201 | 6 | -5.038175 | 0.686037  | -0.133920 |
| 6 | 0.693944  | 1.151134  | 0.322818  | 1 | -5.810071 | -1.229736 | 0.321371  |
| 6 | 0.693499  | -1.143107 | -0.365059 | 1 | -3.461823 | -2.090931 | 0.505638  |
| 6 | -0.693917 | 1.151131  | 0.322819  | 1 | -3.436218 | 2.125642  | -0.499415 |
| 6 | -0.693459 | -1.143114 | -0.365059 | 1 | -5.973417 | 1.207387  | -0.253449 |

### 1,3'-PhDP

|   |           |           |           |   |           |           |           |
|---|-----------|-----------|-----------|---|-----------|-----------|-----------|
| 7 | -4.946467 | -0.653406 | -0.129652 | 6 | 1.448898  | 0.000796  | 0.002162  |
| 6 | -3.649819 | -1.081332 | -0.199337 | 1 | -1.176232 | 2.015458  | -0.715542 |
| 6 | -2.829340 | 0.007178  | 0.007151  | 1 | -1.172275 | -2.005568 | 0.755102  |
| 6 | -3.684588 | 1.134317  | 0.204409  | 1 | 1.291786  | 2.007874  | -0.739588 |
| 6 | -4.979465 | 0.693360  | 0.116403  | 1 | 1.294771  | -2.003459 | 0.752814  |
| 1 | -5.754638 | -1.238209 | -0.259275 | 6 | 4.973291  | -0.674219 | -0.243255 |
| 1 | -3.409314 | -2.108801 | -0.419283 | 6 | 3.663264  | -1.058117 | -0.371786 |
| 1 | -3.375958 | 2.145446  | 0.418428  | 7 | 2.864876  | -0.000316 | -0.001911 |
| 1 | -5.913760 | 1.219813  | 0.219215  | 6 | 3.667481  | 1.055826  | 0.363492  |
| 6 | -1.360270 | 0.002490  | 0.011782  | 6 | 4.975969  | 0.669321  | 0.227348  |
| 6 | -0.640072 | 1.134624  | -0.381411 | 1 | 5.832587  | -1.283424 | -0.473002 |
| 6 | -0.638356 | -1.128715 | 0.406554  | 1 | 3.224428  | -1.974167 | -0.731748 |
| 6 | 0.747459  | 1.137167  | -0.394045 | 1 | 3.232598  | 1.972729  | 0.726049  |
| 6 | 0.748780  | -1.134107 | 0.406463  | 1 | 5.837744  | 1.276839  | 0.452198  |

### HPB<sub>N1</sub>

|   |           |           |           |   |           |           |           |
|---|-----------|-----------|-----------|---|-----------|-----------|-----------|
| 6 | -1.316450 | -0.478093 | -0.000861 | 6 | 1.253336  | 4.770404  | 0.588288  |
| 6 | -1.072239 | 0.901221  | -0.000912 | 6 | 0.458483  | 4.911071  | -0.588045 |
| 6 | 0.244402  | 1.379262  | -0.000914 | 6 | -4.024139 | 2.852394  | -0.586948 |
| 6 | 1.316766  | 0.477994  | -0.000749 | 6 | -3.504684 | 3.470180  | 0.589387  |
| 6 | 1.072573  | -0.901335 | -0.000616 | 6 | -4.757818 | -1.298979 | 0.589178  |
| 6 | -0.244123 | -1.379396 | -0.000858 | 6 | -4.482924 | -2.057153 | -0.587609 |
| 7 | 2.152577  | -1.808530 | 0.000106  | 1 | -0.243414 | -5.823724 | -1.120008 |
| 6 | 3.178163  | -1.832965 | -0.924361 | 1 | -1.771138 | -5.553157 | 1.118728  |
| 6 | 0.001426  | -3.668324 | -0.925608 | 1 | 3.924789  | -4.308796 | 1.121715  |
| 7 | -0.490144 | -2.768309 | -0.000738 | 1 | 4.923212  | -3.121652 | -1.117234 |
| 7 | 2.642477  | 0.959670  | -0.000412 | 1 | 5.165157  | 2.701055  | -1.119655 |
| 6 | 3.613198  | 0.631676  | 0.925504  | 1 | 5.694085  | 1.244656  | 1.120395  |
| 6 | 2.353214  | -2.813582 | 0.925808  | 1 | 1.769233  | 5.553444  | 1.119969  |
| 7 | 0.490435  | 2.768139  | -0.000882 | 1 | 0.241982  | 5.823778  | -1.119153 |
| 6 | -0.001285 | 3.668126  | -0.925692 | 1 | -4.923183 | 3.120951  | -1.117613 |
| 6 | 3.176402  | 1.834652  | -0.925788 | 1 | -3.925038 | 4.308157  | 1.121457  |
| 7 | -2.152184 | 1.808478  | -0.000447 | 1 | -5.693722 | -1.243660 | 1.121178  |
| 6 | -2.353073 | 2.813380  | 0.925351  | 1 | -5.165549 | -2.700485 | -1.118777 |
| 6 | 1.260053  | 3.444865  | 0.924834  | 1 | 1.637000  | -2.984252 | 1.714202  |

|   |           |           |           |   |           |           |           |
|---|-----------|-----------|-----------|---|-----------|-----------|-----------|
| 7 | -2.642220 | -0.959631 | -0.000179 | 1 | 3.223300  | -1.098522 | -1.713152 |
| 6 | -3.176550 | -1.834537 | -0.925393 | 1 | 0.660228  | -3.339873 | -1.714093 |
| 6 | -3.177727 | 1.832809  | -0.924963 | 1 | -1.766664 | -2.910011 | 1.712771  |
| 6 | -1.260646 | -3.444800 | 0.924364  | 1 | -3.402213 | 0.073942  | 1.714541  |
| 6 | -3.612728 | -0.631219 | 0.925816  | 1 | -2.563335 | -2.240325 | -1.714638 |
| 6 | -0.459508 | -4.911050 | -0.588679 | 1 | -3.222651 | 1.098480  | -1.713872 |
| 6 | -1.254583 | -4.770267 | 0.587463  | 1 | -1.636884 | 2.984134  | 1.713763  |
| 6 | 3.504649  | -3.470643 | 0.589753  | 1 | -0.659495 | 3.339476  | -1.714604 |
| 6 | 4.024255  | -2.852885 | -0.586523 | 1 | 1.766008  | 2.910169  | 1.713340  |
| 6 | 4.482785  | 2.057635  | -0.588265 | 1 | 2.562925  | 2.240206  | -1.714954 |
| 6 | 4.758074  | 1.299660  | 0.588557  | 1 | 3.402963  | -0.073325 | 1.714440  |

**HPB<sub>C2</sub>**

|   |           |           |           |   |           |           |           |
|---|-----------|-----------|-----------|---|-----------|-----------|-----------|
| 6 | 1.157205  | 0.798957  | -0.002280 | 6 | 0.245684  | -5.077636 | 0.523283  |
| 6 | 1.271502  | -0.600247 | -0.001369 | 6 | 1.046926  | -4.882982 | -0.577372 |
| 6 | 0.112064  | -1.402518 | -0.003143 | 6 | 4.663947  | -2.022286 | -0.522496 |
| 6 | -1.156538 | -0.801795 | -0.002014 | 6 | 4.201147  | -2.695907 | 0.583550  |
| 6 | -1.271578 | 0.603525  | -0.002929 | 6 | 4.276164  | 2.747074  | 0.525878  |
| 6 | -0.117092 | 1.402206  | -0.001962 | 6 | 3.710603  | 3.341956  | -0.577541 |
| 6 | -2.612889 | 1.224216  | 0.024867  | 1 | -0.935442 | 5.953292  | -0.996424 |
| 7 | -3.590199 | 0.886731  | -0.877437 | 1 | 0.686897  | 5.765939  | 1.173207  |
| 6 | -0.872619 | 3.714664  | -0.909168 | 1 | -5.234996 | 2.981028  | 0.999625  |
| 6 | -0.224240 | 2.876502  | -0.027374 | 1 | -5.642195 | 1.392267  | -1.164352 |
| 6 | -2.379970 | -1.631480 | -0.027266 | 1 | -4.691679 | -3.781851 | -0.997840 |
| 7 | -3.392567 | -1.460635 | 0.883041  | 1 | -5.335182 | -2.290875 | 1.177978  |
| 6 | -3.164530 | 2.128134  | 0.907832  | 1 | 0.037364  | -6.025399 | 0.992917  |
| 6 | 0.245176  | -2.874629 | 0.022865  | 1 | 1.619157  | -5.578403 | -1.168852 |
| 7 | 1.027703  | -3.550084 | -0.879628 | 1 | 5.624158  | -2.164033 | -0.991711 |
| 6 | -2.783718 | -2.609220 | -0.911227 | 1 | 4.652171  | -3.471077 | 1.180693  |
| 6 | 2.602059  | -1.243819 | -0.026350 | 1 | 5.200710  | 3.040141  | 0.996557  |
| 7 | 2.960143  | -2.207154 | 0.882927  | 1 | 4.029320  | 4.183418  | -1.170186 |
| 6 | -0.262702 | -3.806210 | 0.903175  | 1 | 1.873005  | 2.956724  | -1.554101 |
| 6 | 2.366431  | 1.648943  | 0.025459  | 1 | 3.580629  | 0.971804  | 1.712010  |
| 7 | 2.564569  | 2.661159  | -0.879647 | 1 | 1.099138  | 3.318412  | 1.554458  |
| 6 | 3.652420  | -1.101617 | -0.907918 | 1 | -1.513505 | 3.391169  | -1.715048 |
| 7 | 0.435064  | 3.668719  | 0.878572  | 1 | -3.501085 | 0.139117  | -1.551008 |
| 6 | 3.426212  | 1.673980  | 0.907034  | 1 | -2.632693 | 2.613959  | 1.711582  |
| 6 | -0.578692 | 5.051187  | -0.526122 | 1 | -2.185347 | -2.999323 | -1.720280 |
| 6 | 0.238195  | 4.987586  | 0.578417  | 1 | -3.420148 | -0.712057 | 1.560775  |
| 6 | -4.519456 | 2.326505  | 0.528686  | 1 | 1.631094  | -3.097328 | -1.551654 |
| 6 | -4.753089 | 1.537765  | -0.573361 | 1 | -0.952008 | -3.590657 | 1.705202  |
| 6 | -4.087344 | -3.023764 | -0.526350 | 1 | 2.325355  | -2.606376 | 1.559798  |
| 6 | -4.437946 | -2.288185 | 0.581391  | 1 | 3.692308  | -0.386505 | -1.715300 |

---

**HPB<sub>C3</sub>**

|   |           |           |           |   |           |           |          |
|---|-----------|-----------|-----------|---|-----------|-----------|----------|
| 6 | -0.413934 | -1.345150 | -0.043579 | 7 | -3.735755 | 3.371472  | -0.51887 |
| 6 | -1.371824 | -0.314111 | -0.043347 | 6 | -3.184597 | 3.912388  | 0.61538  |
| 6 | -0.957897 | 1.031039  | -0.043422 | 6 | -4.980592 | -0.800509 | 0.615966 |
| 6 | 0.413944  | 1.345151  | -0.043493 | 7 | -4.788092 | -1.548561 | -0.5182  |
| 6 | 1.371833  | 0.314109  | -0.04344  | 7 | -1.052942 | -4.920572 | -0.52103 |
| 6 | 0.957912  | -1.031047 | -0.043533 | 6 | -1.797085 | -4.714109 | 0.613224 |
| 6 | 2.816964  | 0.648956  | -0.02143  | 1 | 3.612864  | -4.783156 | 1.083728 |
| 6 | 3.780338  | 0.224736  | 0.943816  | 1 | 4.571861  | -3.698423 | -0.97154 |
| 6 | 2.085738  | -3.161200 | 0.943578  | 1 | 5.489787  | 2.108438  | -0.97104 |
| 6 | 1.970680  | -2.114971 | -0.021765 | 1 | 5.948838  | 0.734976  | 1.084007 |
| 6 | 0.846559  | 2.764102  | -0.022099 | 1 | 2.337455  | 5.520203  | 1.082024 |
| 6 | 0.469496  | 3.744243  | -0.908804 | 1 | 0.918328  | 5.808081  | -0.97317 |
| 6 | 3.477767  | 1.465822  | -0.907577 | 1 | -4.571697 | 3.698705  | -0.97128 |
| 6 | -1.970628 | 2.114983  | -0.0216   | 1 | -3.612610 | 4.783212  | 1.084022 |
| 6 | -2.085566 | 3.161223  | 0.943743  | 1 | -5.948722 | -0.735129 | 1.084621 |
| 6 | 1.695504  | 3.386926  | 0.94285   | 1 | -5.489733 | -2.108788 | -0.97035 |
| 6 | -2.816951 | -0.648996 | -0.021153 | 1 | -0.918843 | -5.807869 | -0.9741  |
| 6 | -3.477838 | -1.465729 | -0.907329 | 1 | -2.337625 | -5.520246 | 1.081319 |
| 6 | -3.008369 | 2.278449  | -0.907839 | 1 | -3.301075 | 1.676539  | -1.75296 |
| 6 | -0.846608 | -2.764079 | -0.022418 | 1 | -1.413111 | 3.339700  | 1.768643 |
| 6 | -1.695561 | -3.387005 | 0.942457  | 1 | -3.103239 | -2.020286 | -1.75252 |
| 6 | -3.780228 | -0.224821 | 0.94421   | 1 | -3.598249 | 0.446866  | 1.768975 |
| 6 | 3.008241  | -2.278483 | -0.908175 | 1 | -2.186298 | -2.894169 | 1.767572 |
| 6 | -0.469504 | -3.744158 | -0.909201 | 1 | 0.198195  | -3.696452 | -1.75425 |
| 6 | 3.184771  | -3.912355 | 0.615089  | 1 | 3.300776  | -1.676573 | -1.75336 |
| 7 | 3.735721  | -3.371449 | -0.519276 | 1 | 1.413412  | -3.339728 | 1.768571 |
| 7 | 4.788088  | 1.548550  | -0.518595 | 1 | 3.598373  | -0.446978 | 1.768563 |
| 6 | 4.980658  | 0.800403  | 0.615488  | 1 | 3.103125  | 2.020487  | -1.75267 |
| 6 | 1.796959  | 4.714104  | 0.613786  | 1 | -0.198178 | 3.696565  | -1.75388 |
| 7 | 1.052833  | 4.920636  | -0.520474 | 1 | 2.186299  | 2.894048  | 1.767905 |

---

**HPB<sub>N16σ</sub>**

|   |           |           |           |   |           |           |          |
|---|-----------|-----------|-----------|---|-----------|-----------|----------|
| 6 | -1.322567 | -0.370804 | -0.339196 | 6 | -0.489087 | -4.798138 | 0.217221 |
| 6 | -0.982462 | 0.959941  | -0.339220 | 6 | -1.873094 | -4.444441 | 0.217108 |
| 6 | 0.340129  | 1.330769  | -0.339144 | 6 | 3.910909  | -2.822720 | 0.216752 |
| 6 | 1.322576  | 0.370807  | -0.339315 | 6 | 2.912490  | -3.844421 | 0.216908 |
| 6 | 0.982457  | -0.959934 | -0.339119 | 6 | 4.400025  | 1.975595  | 0.216244 |
| 6 | -0.340130 | -1.330776 | -0.339213 | 6 | 4.785772  | 0.600180  | 0.216241 |
| 7 | 1.952305  | -1.907517 | -0.171331 | 6 | 0.489085  | 4.798129  | 0.217247 |
| 6 | 1.679551  | -3.258591 | -0.011328 | 6 | 1.873094  | 4.444433  | 0.217125 |
| 6 | 0.259530  | -3.656748 | -0.011263 | 6 | -3.910906 | 2.822723  | 0.216764 |
| 7 | -0.675878 | -2.644443 | -0.171311 | 6 | -2.912490 | 3.844423  | 0.216905 |

|   |           |           |           |   |           |           |          |
|---|-----------|-----------|-----------|---|-----------|-----------|----------|
| 7 | 2.628149  | 0.736889  | -0.171627 | 6 | -4.400030 | -1.975596 | 0.216220 |
| 6 | 3.661999  | -0.174788 | -0.011889 | 6 | -4.785777 | -0.600179 | 0.216217 |
| 6 | 3.296787  | -1.603655 | -0.011662 | 1 | -0.091722 | -5.785795 | 0.386905 |
| 7 | 0.675879  | 2.644448  | -0.171373 | 1 | -2.695531 | -5.120351 | 0.387030 |
| 6 | 1.982295  | 3.083813  | -0.011396 | 1 | 4.964959  | -2.972524 | 0.386182 |
| 6 | 3.037127  | 2.053173  | -0.011663 | 1 | 3.086669  | -4.894699 | 0.386385 |
| 7 | -1.952305 | 1.907518  | -0.171319 | 1 | 5.056662  | 2.813611  | 0.385630 |
| 6 | -1.679552 | 3.258591  | -0.011342 | 1 | 5.782466  | 0.226013  | 0.385743 |
| 6 | -0.259531 | 3.656748  | -0.011273 | 1 | 0.091720  | 5.785783  | 0.386948 |
| 7 | -2.628145 | -0.736888 | -0.171603 | 1 | 2.695531  | 5.120340  | 0.387056 |
| 6 | -3.661999 | 0.174792  | -0.011878 | 1 | -4.964953 | 2.972525  | 0.386215 |
| 6 | -3.296785 | 1.603657  | -0.011658 | 1 | -3.086665 | 4.894701  | 0.386390 |
| 6 | -1.982294 | -3.083814 | -0.011382 | 1 | -5.056673 | -2.813613 | 0.385576 |
| 6 | -3.037126 | -2.053174 | -0.011643 | 1 | -5.782477 | -0.226013 | 0.385687 |

**HPB<sub>C26σ</sub>**

|   |           |           |           |   |           |           |          |
|---|-----------|-----------|-----------|---|-----------|-----------|----------|
| 6 | 0.133750  | -1.387659 | -0.970755 | 6 | 3.853998  | -2.462267 | 0.594993 |
| 6 | -1.134767 | -0.809696 | -0.970774 | 6 | 3.255149  | 3.236993  | 0.638110 |
| 6 | -1.268550 | 0.577955  | -0.970808 | 6 | 4.059442  | 2.106393  | 0.595039 |
| 6 | -0.133749 | 1.387658  | -0.970756 | 6 | -1.175792 | 4.437630  | 0.637950 |
| 6 | 1.134766  | 0.809697  | -0.970771 | 6 | 0.205531  | 4.568675  | 0.595205 |
| 6 | 1.268550  | -0.577955 | -0.970811 | 6 | -4.431105 | 1.200496  | 0.637626 |
| 6 | 2.189541  | 1.616691  | -0.491421 | 6 | -3.853984 | 2.462272  | 0.595014 |
| 7 | 3.407692  | 1.101598  | -0.079640 | 6 | -3.255203 | -3.237050 | 0.637968 |
| 6 | 3.549255  | -0.314826 | -0.032522 | 6 | -4.059442 | -2.106407 | 0.595025 |
| 6 | 2.494846  | -1.087870 | -0.491528 | 6 | 1.175769  | -4.437550 | 0.638098 |
| 6 | -0.305330 | 2.704591  | -0.491410 | 6 | -0.205543 | -4.568668 | 0.595219 |
| 7 | 0.749825  | 3.501847  | -0.079354 | 1 | 5.369482  | -0.967402 | 1.114388 |
| 6 | 2.047254  | 2.916241  | -0.032206 | 1 | 4.209411  | -3.390393 | 1.010929 |
| 6 | -2.494840 | 1.087865  | -0.491504 | 1 | 3.522392  | 4.165988  | 1.115321 |
| 7 | -2.657859 | 2.400284  | -0.079453 | 1 | 5.040924  | 1.950014  | 1.010957 |
| 6 | -1.501994 | 3.231134  | -0.032242 | 1 | -1.846689 | 5.133726  | 1.114959 |
| 6 | -2.189549 | -1.616695 | -0.491444 | 1 | 0.831698  | 5.340469  | 1.011138 |
| 7 | -3.407695 | -1.101604 | -0.079647 | 1 | -5.369375 | 0.967374  | 1.114586 |
| 6 | -3.549243 | 0.314820  | -0.032488 | 1 | -4.209407 | 3.390406  | 1.010920 |
| 6 | 0.305331  | -2.704584 | -0.491389 | 1 | -3.522472 | -4.166071 | 1.115115 |
| 7 | -0.749828 | -3.501841 | -0.079347 | 1 | -5.040908 | -1.950022 | 1.010979 |
| 6 | -2.047264 | -2.916248 | -0.032240 | 1 | 1.846656  | -5.133610 | 1.115175 |
| 7 | 2.657865  | -2.400283 | -0.079461 | 1 | -0.831713 | -5.340479 | 1.011116 |
| 6 | 1.501993  | -3.231121 | -0.032208 | 6 | 4.431179  | -1.200516 | 0.637487 |

**HPB<sub>C36σ</sub>**

|   |          |           |          |   |          |           |          |
|---|----------|-----------|----------|---|----------|-----------|----------|
| 6 | 1.340930 | -0.387631 | 0.824315 | 6 | 3.284359 | 1.568247  | 0.064612 |
| 6 | 1.006150 | 0.967441  | 0.824298 | 6 | 1.975585 | -3.102444 | 0.032710 |

|   |           |           |           |   |           |           |           |
|---|-----------|-----------|-----------|---|-----------|-----------|-----------|
| 6 | -0.334787 | 1.355073  | 0.824280  | 6 | 3.000386  | -2.060156 | 0.064576  |
| 6 | -1.340930 | 0.387631  | 0.824315  | 7 | 0.439154  | -4.664599 | -0.476072 |
| 6 | -1.006150 | -0.967441 | 0.824298  | 6 | 1.792983  | -4.366379 | -0.504079 |
| 6 | 0.334787  | -1.355074 | 0.824281  | 7 | -3.820553 | -2.712807 | -0.474928 |
| 6 | -1.987051 | -1.911057 | 0.427380  | 6 | -2.885209 | -3.736003 | -0.503495 |
| 6 | -1.699086 | -3.262044 | 0.032664  | 7 | -4.259733 | 1.952197  | -0.474928 |
| 6 | -0.283973 | -3.628222 | 0.063971  | 6 | -4.678299 | 0.630604  | -0.503138 |
| 6 | 0.661537  | -2.676336 | 0.427214  | 7 | -0.439153 | 4.664596  | -0.476080 |
| 6 | -2.648668 | 0.765292  | 0.427484  | 6 | -1.792982 | 4.366376  | -0.504086 |
| 6 | -3.674767 | -0.159594 | 0.033085  | 7 | 3.820556  | 2.712810  | -0.474919 |
| 6 | -3.284358 | -1.568246 | 0.064609  | 6 | 2.885212  | 3.736004  | -0.503488 |
| 6 | -0.661537 | 2.676334  | 0.427209  | 7 | 4.259729  | -1.952196 | -0.474937 |
| 6 | -1.975585 | 3.102442  | 0.032705  | 6 | 4.678297  | -0.630603 | -0.503145 |
| 6 | -3.000387 | 2.060156  | 0.064579  | 1 | 0.050696  | -5.523437 | -0.828575 |
| 6 | 1.987052  | 1.911058  | 0.427384  | 1 | 2.489961  | -5.076354 | -0.918043 |
| 6 | 1.699087  | 3.262045  | 0.032668  | 1 | -4.758897 | -2.806085 | -0.826441 |
| 6 | 0.283973  | 3.628221  | 0.063967  | 1 | -3.151755 | -4.694653 | -0.917199 |
| 6 | 2.648667  | -0.765292 | 0.427480  | 1 | -4.809567 | 2.718130  | -0.826773 |
| 6 | 3.674766  | 0.159594  | 0.033080  | 1 | -5.641864 | 0.382053  | -0.916628 |
| 1 | 4.758901  | 2.806090  | -0.826428 | 1 | -0.050696 | 5.523434  | -0.828584 |
| 1 | 3.151759  | 4.694656  | -0.917189 | 1 | -2.489960 | 5.076350  | -0.918052 |
| 1 | 4.809563  | -2.718129 | -0.826782 | 1 | 5.641860  | -0.382051 | -0.916639 |

**OPN<sub>N1</sub>**

|   |           |          |           |   |           |           |           |
|---|-----------|----------|-----------|---|-----------|-----------|-----------|
| 7 | -0.248053 | 1.405146 | 2.800191  | 6 | -1.679205 | -3.923076 | -2.105517 |
| 7 | -0.144355 | 3.705713 | 1.298307  | 6 | -1.544722 | -5.182556 | -2.622566 |
| 7 | 0.516166  | 3.619058 | -1.425355 | 6 | -0.253425 | -5.663262 | -2.254993 |
| 7 | 0.732772  | 1.152201 | -2.724543 | 6 | 0.355208  | -4.685679 | -1.516670 |
| 6 | -0.070248 | 1.279146 | 1.404930  | 1 | 1.309317  | -4.659271 | -1.014075 |
| 6 | 0.535512  | 2.175047 | 3.638991  | 1 | 0.175641  | -6.621943 | -2.497542 |
| 6 | -0.037294 | 2.170736 | 4.878030  | 1 | -2.284991 | -5.697905 | -3.212896 |
| 6 | -1.226527 | 1.385633 | 4.797963  | 1 | -2.471747 | -3.195811 | -2.190304 |
| 6 | -1.333854 | 0.935520 | 3.512251  | 6 | 0.000000  | -2.451338 | 0.666991  |
| 6 | 0.000000  | 2.451338 | 0.666991  | 7 | 0.144355  | -3.705713 | 1.298307  |
| 6 | 0.796948  | 4.716189 | 1.311822  | 6 | -0.796948 | -4.716189 | 1.311822  |
| 6 | 0.293642  | 5.749209 | 2.053425  | 6 | -0.293642 | -5.749209 | 2.053425  |
| 6 | -1.002375 | 5.362323 | 2.506133  | 6 | 1.002375  | -5.362323 | 2.506133  |
| 6 | -1.243281 | 4.101500 | 2.034657  | 6 | 1.243281  | -4.101500 | 2.034657  |
| 6 | 0.263280  | 2.417795 | -0.729012 | 1 | 2.073514  | -3.429253 | 2.183334  |
| 6 | 1.679205  | 3.923076 | -2.105517 | 1 | 1.675742  | -5.940978 | 3.117465  |
| 6 | 1.544722  | 5.182556 | -2.622566 | 1 | -0.793352 | -6.685950 | 2.240264  |
| 6 | 0.253425  | 5.663262 | -2.254993 | 1 | -1.718803 | -4.617534 | 0.759853  |
| 6 | -0.355208 | 4.685679 | -1.516670 | 6 | 0.070248  | -1.279146 | 1.404930  |

|   |           |          |           |   |           |           |           |
|---|-----------|----------|-----------|---|-----------|-----------|-----------|
| 6 | 0.286530  | 1.208322 | -1.384198 | 7 | 0.248053  | -1.405146 | 2.800191  |
| 6 | 1.940989  | 0.582766 | -3.081171 | 6 | -0.535512 | -2.175047 | 3.638991  |
| 6 | 2.157140  | 0.848588 | -4.406148 | 6 | 0.037294  | -2.170736 | 4.878030  |
| 6 | 1.044479  | 1.605567 | -4.875625 | 6 | 1.226527  | -1.385633 | 4.797963  |
| 6 | 0.193381  | 1.786582 | -3.819001 | 6 | 1.333854  | -0.935520 | 3.512251  |
| 6 | 0.000000  | 0.000000 | -0.679176 | 1 | 2.070388  | -0.309723 | 3.034537  |
| 6 | 0.000000  | 0.000000 | 0.749590  | 1 | 1.916118  | -1.167554 | 5.597362  |
| 1 | 1.420721  | 2.664886 | 3.266022  | 1 | -0.351370 | -2.672006 | 5.749521  |
| 1 | 0.351370  | 2.672006 | 5.749521  | 1 | -1.420721 | -2.664886 | 3.266022  |
| 1 | -1.916118 | 1.167554 | 5.597362  | 1 | -0.745274 | 2.310949  | -3.739198 |
| 1 | -2.070388 | 0.309723 | 3.034537  | 6 | -0.286530 | -1.208322 | -1.384198 |
| 1 | 1.718803  | 4.617534 | 0.759853  | 7 | -0.732772 | -1.152201 | -2.724543 |
| 1 | 0.793352  | 6.685950 | 2.240264  | 6 | -1.940989 | -0.582766 | -3.081171 |
| 1 | -1.675742 | 5.940978 | 3.117465  | 6 | -2.157140 | -0.848588 | -4.406148 |
| 1 | -2.073514 | 3.429253 | 2.183334  | 6 | -1.044479 | -1.605567 | -4.875625 |
| 1 | 2.471747  | 3.195811 | -2.190304 | 6 | -0.193381 | -1.786582 | -3.819001 |
| 1 | 2.284991  | 5.697905 | -3.212896 | 1 | 0.745274  | -2.310949 | -3.739198 |
| 1 | -0.175641 | 6.621943 | -2.497542 | 1 | -0.885744 | -1.971873 | -5.876731 |
| 1 | -1.309317 | 4.659271 | -1.014075 | 1 | -3.011383 | -0.526762 | -4.980029 |
| 1 | 2.524385  | 0.044257 | -2.350787 | 1 | -2.524385 | -0.044257 | -2.350787 |
| 1 | 3.011383  | 0.526762 | -4.980029 | 6 | -0.263280 | -2.417795 | -0.729012 |
| 1 | 0.885744  | 1.971873 | -5.876731 | 7 | -0.516166 | -3.619058 | -1.425355 |

**OPN<sub>N16σ</sub>**

|   |           |           |           |   |           |          |           |
|---|-----------|-----------|-----------|---|-----------|----------|-----------|
| 6 | 0.685693  | -2.433486 | 0.152404  | 6 | -4.964550 | 1.176635 | 0.975475  |
| 6 | -0.685692 | -2.433490 | -0.152354 | 6 | -4.599257 | 2.462088 | 1.420524  |
| 6 | -1.423066 | -1.266330 | -0.181166 | 6 | -3.278075 | 2.638839 | 1.098584  |
| 6 | -0.735893 | -0.000001 | 0.000005  | 6 | -2.473776 | 3.814340 | 1.053158  |
| 6 | 0.735893  | 0.000001  | 0.000005  | 6 | -2.653933 | 5.154396 | 1.318204  |
| 6 | 1.423066  | -1.266327 | 0.181177  | 6 | -1.502904 | 5.839341 | 0.847785  |
| 6 | -1.423066 | 1.266327  | 0.181177  | 6 | -0.645763 | 4.906883 | 0.308077  |
| 6 | -0.685693 | 2.433486  | 0.152404  | 6 | 0.645765  | 4.906890 | -0.307940 |
| 6 | 0.685692  | 2.433490  | -0.152354 | 6 | 1.502890  | 5.839362 | -0.847649 |
| 6 | 1.423066  | 1.266330  | -0.181166 | 6 | 2.653904  | 5.154430 | -1.318124 |
| 7 | 2.794368  | 1.464734  | -0.495517 | 6 | 2.473779  | 3.814376 | -1.053053 |
| 7 | 2.794374  | -1.464727 | 0.495501  | 6 | 3.278058  | 2.638866 | -1.098570 |
| 7 | 1.251636  | -3.666070 | 0.440542  | 6 | 4.599200  | 2.462087 | -1.420657 |
| 7 | -1.251642 | -3.666083 | -0.440433 | 6 | 4.964483  | 1.176584 | -0.975744 |
| 7 | -2.794368 | -1.464734 | -0.495517 | 6 | 3.860787  | 0.600821 | -0.387101 |
| 7 | -2.794374 | 1.464727  | 0.495501  | 1 | -1.317256 | 6.899978 | 0.897210  |
| 7 | -1.251636 | 3.666070  | 0.440542  | 1 | -3.525797 | 5.592967 | 1.775090  |
| 7 | 1.251642  | 3.666083  | -0.440433 | 1 | 1.317229  | 6.899998 | -0.897070 |
| 6 | 3.860813  | -0.600865 | 0.386915  | 1 | 3.525743  | 5.593010 | -1.775050 |

|   |           |           |           |   |           |           |           |
|---|-----------|-----------|-----------|---|-----------|-----------|-----------|
| 6 | 4.964550  | -1.176635 | 0.975475  | 1 | 5.230340  | 3.207234  | -1.876894 |
| 6 | 4.599257  | -2.462088 | 1.420524  | 1 | 5.933139  | 0.708836  | -1.044402 |
| 6 | 3.278075  | -2.638839 | 1.098584  | 1 | 5.933230  | -0.708917 | 1.044013  |
| 6 | 2.473776  | -3.814340 | 1.053158  | 1 | 5.230420  | -3.207226 | 1.876743  |
| 6 | 2.653933  | -5.154396 | 1.318204  | 1 | 3.525797  | -5.592967 | 1.775090  |
| 6 | 1.502904  | -5.839341 | 0.847785  | 1 | 1.317256  | -6.899978 | 0.897210  |
| 6 | 0.645763  | -4.906883 | 0.308077  | 1 | -1.317229 | -6.899998 | -0.897070 |
| 6 | -0.645765 | -4.906890 | -0.307940 | 1 | -3.525743 | -5.593010 | -1.775050 |
| 6 | -1.502890 | -5.839362 | -0.847649 | 1 | -5.230340 | -3.207234 | -1.876894 |
| 6 | -2.653904 | -5.154430 | -1.318124 | 1 | -5.933139 | -0.708836 | -1.044402 |
| 6 | -2.473779 | -3.814376 | -1.053053 | 1 | -5.933230 | 0.708917  | 1.044013  |
| 6 | -3.278058 | -2.638866 | -1.098570 | 1 | -5.230420 | 3.207226  | 1.876743  |
| 6 | -4.599200 | -2.462087 | -1.420657 | 6 | -3.860787 | -0.600821 | -0.387101 |
| 6 | -4.964483 | -1.176584 | -0.975744 | 6 | -3.860813 | 0.600865  | 0.386915  |

**OPN<sub>C36σ</sub>**

|   |           |           |           |   |           |           |           |
|---|-----------|-----------|-----------|---|-----------|-----------|-----------|
| 6 | -2.459728 | 0.702112  | -0.100617 | 6 | 5.340178  | 2.860214  | 0.688459  |
| 6 | -2.457751 | -0.703641 | 0.091935  | 6 | 3.976409  | 2.666874  | 0.588434  |
| 6 | -1.278060 | -1.454052 | 0.117148  | 6 | 2.785685  | 3.437980  | 0.603944  |
| 6 | 0.000794  | -0.739369 | -0.001138 | 7 | 2.691822  | 4.791023  | 0.736132  |
| 6 | -0.001023 | 0.739365  | 0.004898  | 6 | 1.402661  | 5.179543  | 0.489763  |
| 6 | -1.280060 | 1.453419  | -0.115780 | 6 | 0.677434  | 4.048477  | 0.206795  |
| 6 | 1.280352  | -1.453735 | -0.113037 | 1 | 7.057565  | -1.629083 | -0.481135 |
| 6 | 2.459614  | -0.701663 | -0.103872 | 1 | 5.737162  | -3.722993 | -0.895110 |
| 6 | 2.457664  | 0.703262  | 0.094583  | 1 | 6.928860  | 1.479765  | 0.428814  |
| 6 | 1.278304  | 1.454380  | 0.114522  | 1 | 5.935910  | 3.730230  | 0.906855  |
| 6 | 1.522915  | 2.902843  | 0.305257  | 1 | 3.465201  | 5.402412  | 0.932735  |
| 6 | -1.522226 | 2.902033  | -0.295539 | 1 | 1.107595  | 6.213965  | 0.555013  |
| 6 | -3.753947 | 1.304886  | -0.278656 | 1 | -0.984678 | 6.052569  | -0.508873 |
| 6 | -3.750313 | -1.309618 | 0.265603  | 1 | -3.427238 | 5.607731  | -0.937619 |
| 6 | -1.522947 | -2.902902 | 0.304157  | 1 | -5.737043 | 3.722760  | -0.896066 |
| 6 | 1.522208  | -2.901984 | -0.296678 | 1 | -7.057494 | 1.628923  | -0.481756 |
| 6 | 3.753983  | -1.304857 | -0.279115 | 1 | -6.928768 | -1.479501 | 0.430217  |
| 6 | 3.750355  | 1.309672  | 0.265373  | 1 | -5.935820 | -3.730309 | 0.906844  |
| 6 | -0.689075 | 3.999594  | -0.191470 | 1 | -3.464483 | -5.402417 | 0.934588  |
| 7 | -1.393907 | 5.134632  | -0.462952 | 1 | -1.107820 | -6.214222 | 0.551702  |
| 6 | -2.703051 | 4.841434  | -0.719849 | 1 | 0.984034  | -6.052130 | -0.513460 |
| 6 | -2.823368 | 3.477750  | -0.605435 | 1 | 3.427199  | -5.607512 | -0.939536 |
| 6 | -3.954445 | 2.624813  | -0.585444 | 6 | -1.402754 | -5.179699 | 0.487527  |
| 7 | -5.299734 | 2.840186  | -0.692962 | 6 | -0.677460 | -4.048494 | 0.205235  |
| 6 | -5.981751 | 1.662168  | -0.441634 | 6 | 0.689038  | -3.999545 | -0.193036 |
| 6 | -5.044027 | 0.690027  | -0.178035 | 7 | 1.393744  | -5.134527 | -0.465153 |
| 6 | -4.989132 | -0.696691 | 0.161375  | 6 | 2.702984  | -4.841275 | -0.721616 |

|   |           |           |          |   |          |           |           |
|---|-----------|-----------|----------|---|----------|-----------|-----------|
| 7 | -5.935889 | -1.642743 | 0.422310 | 6 | 2.823436 | -3.477692 | -0.606235 |
| 6 | -5.340118 | -2.860245 | 0.688527 | 6 | 3.954507 | -2.624775 | -0.585966 |
| 6 | -3.976374 | -2.666958 | 0.588032 | 7 | 5.299803 | -2.840222 | -0.692970 |
| 6 | -2.785674 | -3.438128 | 0.602944 | 6 | 5.981800 | -1.662201 | -0.441610 |
| 7 | -2.692032 | -4.791381 | 0.733297 | 6 | 5.044043 | -0.689922 | -0.178635 |
| 7 | 5.935948  | 1.642853  | 0.421585 | 6 | 4.989174 | 0.696776  | 0.160846  |

**DPC<sub>N1</sub>**

|   |           |           |           |   |           |           |           |
|---|-----------|-----------|-----------|---|-----------|-----------|-----------|
| 7 | 4.018847  | -2.399297 | -0.048698 | 6 | -1.870035 | -5.186110 | -0.958486 |
| 7 | 1.690657  | -4.366275 | 0.002804  | 1 | -2.177989 | -4.672603 | -1.855250 |
| 7 | -1.039476 | -4.563341 | -0.045973 | 6 | -5.410999 | -0.898575 | 1.007691  |
| 7 | -3.630202 | -2.957278 | 0.002388  | 1 | -4.942553 | -1.434336 | 1.817226  |
| 7 | -4.661567 | -0.421473 | -0.050069 | 6 | -6.720934 | -0.589927 | 0.769768  |
| 7 | -3.934266 | 2.538605  | 0.001634  | 1 | -7.546353 | -0.825266 | 1.422010  |
| 7 | -1.841043 | 4.302257  | -0.045250 | 6 | -6.783689 | 0.086935  | -0.484289 |
| 7 | 1.198899  | 4.525486  | 0.003984  | 1 | -7.663308 | 0.478849  | -0.968832 |
| 7 | 3.523323  | 3.080692  | -0.048374 | 6 | -5.507985 | 0.176165  | -0.964814 |
| 7 | 4.675242  | 0.258201  | 0.001455  | 1 | -5.112339 | 0.627053  | -1.860839 |
| 6 | 4.904932  | -2.452384 | 1.009617  | 6 | -4.677464 | 2.331017  | 1.144136  |
| 1 | 4.840154  | -1.742785 | 1.818378  | 1 | -4.339932 | 1.640721  | 1.900390  |
| 6 | 5.783883  | -3.471817 | 0.773375  | 6 | -5.812999 | 3.088831  | 1.053667  |
| 1 | 6.589625  | -3.765485 | 1.426583  | 1 | -6.603741 | 3.119697  | 1.785819  |
| 6 | 5.438003  | -4.057678 | -0.480378 | 6 | -5.760434 | 3.791706  | -0.184886 |
| 1 | 5.920015  | -4.892070 | -0.963649 | 1 | -6.495396 | 4.477902  | -0.573499 |
| 6 | 4.353357  | -3.381091 | -0.962305 | 6 | -4.592052 | 3.442873  | -0.805738 |
| 1 | 3.768561  | -3.514837 | -1.858321 | 1 | -4.147217 | 3.771463  | -1.731770 |
| 6 | 2.414287  | -4.633046 | 1.145554  | 6 | -2.526706 | 4.864877  | 1.013719  |
| 1 | 2.546137  | -3.875141 | 1.900893  | 1 | -2.891339 | 4.251779  | 1.821784  |
| 6 | 2.888866  | -5.913125 | 1.056652  | 6 | -2.638986 | 6.206466  | 0.778685  |
| 1 | 3.511172  | -6.401223 | 1.789295  | 1 | -3.118439 | 6.916970  | 1.432485  |
| 6 | 2.433477  | -6.452956 | -0.181118 | 6 | -2.014730 | 6.478459  | -0.474718 |
| 1 | 2.625712  | -7.440434 | -0.568388 | 1 | -1.914483 | 7.437268  | -0.957157 |
| 6 | 1.692032  | -5.485623 | -0.803040 | 6 | -1.534921 | 5.294096  | -0.957908 |
| 1 | 1.138586  | -5.491806 | -1.728808 | 1 | -0.983311 | 5.059618  | -1.854254 |
| 6 | -0.816187 | -5.420848 | 1.013719  | 6 | 0.773112  | 5.166559  | 1.147822  |
| 1 | -0.160886 | -5.138907 | 1.821757  | 1 | 0.222982  | 4.630875  | 1.904633  |
| 6 | -1.514645 | -6.571940 | 0.779433  | 6 | 1.141402  | 6.481110  | 1.058069  |
| 1 | -1.544908 | -7.428070 | 1.433856  | 1 | 0.926740  | 7.241739  | 1.791313  |
| 6 | -2.178851 | -6.425778 | -0.474437 | 6 | 1.823949  | 6.650281  | -0.181405 |
| 1 | -2.823863 | -7.142518 | -0.956456 | 1 | 2.247806  | 7.562209  | -0.569706 |
| 6 | -0.454514 | -3.295451 | -0.255109 | 6 | 1.853527  | 5.431939  | -0.803590 |
| 6 | -1.320555 | -2.141237 | -0.469602 | 1 | 2.302363  | 5.111718  | -1.730632 |
| 6 | -2.739338 | -1.884897 | -0.245481 | 6 | 3.848474  | 3.906586  | 1.010071  |
| 6 | -2.444302 | 0.594004  | -0.469780 | 1 | 3.154573  | 4.063438  | 1.819829  |



|   |           |           |           |   |           |           |           |
|---|-----------|-----------|-----------|---|-----------|-----------|-----------|
| 6 | -0.190104 | 2.507901  | -0.468644 | 6 | 5.089056  | 4.428349  | 0.772546  |
| 6 | 2.326900  | 0.955654  | -0.469967 | 1 | 5.617852  | 5.103714  | 1.425536  |
| 6 | 3.324110  | -0.085741 | -0.246097 | 6 | 5.537974  | 3.919556  | -0.482123 |
| 6 | 2.993751  | -1.450914 | -0.256248 | 1 | 6.479651  | 4.121107  | -0.966618 |
| 6 | -3.662949 | -3.726282 | 1.146197  | 6 | 4.559127  | 3.096975  | -0.963410 |
| 1 | -2.903003 | -3.616551 | 1.903007  | 1 | 4.504716  | 2.500480  | -1.860045 |
| 6 | -4.733539 | -4.573352 | 1.055954  | 6 | 5.153448  | 0.862910  | 1.144352  |
| 1 | -5.007035 | -5.315146 | 1.788897  | 1 | 4.474056  | 1.221449  | 1.900799  |
| 6 | -5.385114 | -4.308411 | -0.183441 | 6 | 6.517432  | 0.919519  | 1.054088  |
| 1 | -6.264253 | -4.796514 | -0.571926 | 1 | 7.174388  | 1.360138  | 1.786565  |
| 6 | -4.692655 | -3.305367 | -0.805253 | 6 | 6.889151  | 0.320962  | -0.184594 |
| 1 | -4.867571 | -2.782027 | -1.732028 | 1 | 7.887365  | 0.199348  | -0.572946 |
| 6 | -3.274620 | -0.586294 | -0.256285 | 6 | 5.739575  | -0.084948 | -0.805906 |
| 6 | -2.638964 | 2.022496  | -0.245311 | 1 | 5.573737  | -0.612202 | -1.732133 |
| 6 | -1.569152 | 2.932691  | -0.254279 | 6 | -0.628410 | -1.019393 | -0.838169 |
| 6 | 1.108352  | 3.134342  | -0.244319 | 6 | -1.163415 | 0.282512  | -0.838065 |
| 6 | 2.304706  | 2.398483  | -0.255385 | 6 | -0.090574 | 1.193645  | -0.837742 |
| 6 | 1.628232  | -1.917757 | -0.470067 | 6 | 1.107477  | 0.454882  | -0.838175 |
| 6 | 0.945955  | -3.187782 | -0.245402 | 6 | 0.775081  | -0.912831 | -0.838331 |

**DPC<sub>C3</sub>**

|   |           |           |           |   |           |           |           |
|---|-----------|-----------|-----------|---|-----------|-----------|-----------|
| 6 | -2.154178 | 4.255564  | -0.076015 | 1 | -4.813093 | -3.355545 | -1.766872 |
| 6 | 0.916322  | 4.672699  | 0.017124  | 6 | -5.477825 | -1.202054 | 1.035348  |
| 6 | 3.381452  | 3.363914  | -0.075321 | 1 | -5.091965 | -1.716863 | 1.900932  |
| 6 | 4.727541  | 0.572409  | 0.015854  | 6 | -6.791463 | -0.895723 | 0.795170  |
| 6 | 4.244280  | -2.176485 | -0.075704 | 1 | -7.677230 | -1.068282 | 1.384092  |
| 6 | 2.005255  | -4.318985 | 0.017555  | 7 | -6.859056 | -0.275811 | -0.427329 |
| 6 | -0.758261 | -4.709187 | -0.075026 | 1 | -7.691454 | 0.109085  | -0.838716 |
| 6 | -3.488229 | -3.241625 | 0.017466  | 6 | -5.603091 | -0.171412 | -0.958717 |
| 6 | -4.713105 | -0.733801 | -0.075985 | 1 | -5.428469 | 0.321080  | -1.901377 |
| 6 | -4.160757 | 2.315551  | 0.017512  | 6 | -4.932863 | 2.084287  | 1.192991  |
| 6 | -2.835877 | 4.837610  | 1.035563  | 1 | -4.641285 | 1.482096  | 2.038657  |
| 1 | -3.206468 | 4.311103  | 1.900783  | 6 | -6.128934 | 2.736812  | 1.039914  |
| 6 | -2.950323 | 6.181751  | 0.796139  | 1 | -6.985179 | 2.804007  | 1.690919  |
| 1 | -3.388108 | 6.970562  | 1.385467  | 7 | -6.116022 | 3.350585  | -0.187304 |
| 7 | -2.381428 | 6.438250  | -0.426129 | 1 | -6.838013 | 3.953309  | -0.542195 |
| 1 | -2.272407 | 7.349081  | -0.836959 | 6 | -4.918328 | 3.108234  | -0.808314 |
| 6 | -1.894157 | 5.276236  | -0.958158 | 1 | -4.679142 | 3.540532  | -1.766523 |
| 1 | -1.371552 | 5.262854  | -1.900688 | 6 | 1.077231  | 0.525654  | -0.839124 |
| 6 | 0.457584  | 5.335600  | 1.192517  | 6 | 0.832859  | -0.862158 | -0.838783 |
| 1 | -0.025238 | 4.872266  | 2.038099  | 6 | -0.562539 | -1.058647 | -0.838688 |
| 6 | 0.708502  | 6.674783  | 1.039429  | 6 | -1.180545 | 0.207779  | -0.838979 |
| 1 | 0.507539  | 7.509894  | 1.690333  | 6 | -0.167128 | 1.186897  | -0.839220 |
| 7 | 1.296348  | 6.852155  | -0.187749 | 6 | -0.353270 | 2.494675  | -0.477314 |

|                                 |           |           |           |   |           |           |           |
|---------------------------------|-----------|-----------|-----------|---|-----------|-----------|-----------|
| 1                               | 1.646671  | 7.725031  | -0.542524 | 6 | 0.907168  | 3.212997  | -0.257458 |
| 6                               | 1.436141  | 5.638155  | -0.808668 | 6 | 2.152737  | 2.557160  | -0.276451 |
| 1                               | 1.921430  | 5.544281  | -1.766759 | 6 | 2.263457  | 1.106885  | -0.477186 |
| 6                               | 3.724041  | 4.190916  | 1.037234  | 6 | 3.336137  | 0.130136  | -0.257391 |
| 1                               | 3.108711  | 4.379441  | 1.902658  | 6 | 1.752154  | -1.810589 | -0.476503 |
| 6                               | 4.966928  | 4.715704  | 0.798508  | 6 | -1.180666 | -2.225971 | -0.476355 |
| 1                               | 5.581625  | 5.375285  | 1.388662  | 6 | -2.481794 | 0.434915  | -0.476902 |
| 7                               | 5.386824  | 4.255523  | -0.424299 | 6 | -2.775372 | 1.855667  | -0.257125 |
| 1                               | 6.286839  | 4.433817  | -0.834735 | 6 | -1.766711 | 2.837571  | -0.276443 |
| 6                               | 4.432541  | 3.433351  | -0.957341 | 6 | 5.217877  | 1.213138  | 1.190777  |
| 1                               | 4.581476  | 2.933416  | -1.900487 | 1 | 4.629175  | 1.529034  | 2.037206  |
| 6                               | 5.137820  | -2.246665 | 1.035948  | 6 | 6.568903  | 1.388054  | 1.035954  |
| 1                               | 5.128078  | -1.602933 | 1.901189  | 1 | 7.302032  | 1.836766  | 1.686078  |
| 6                               | 6.020678  | -3.266638 | 0.796448  | 7 | 6.917527  | 0.884086  | -0.191816 |
| 1                               | 6.838671  | -3.647285 | 1.385671  | 1 | 7.855428  | 0.820776  | -0.547962 |
| 7                               | 5.711398  | -3.808413 | -0.425927 | 6 | 5.805238  | 0.376401  | -0.811421 |
| 1                               | 6.158907  | -4.609105 | -0.836906 | 1 | 5.864491  | -0.113719 | -1.769822 |
| 6                               | 4.634060  | -3.154921 | -0.957920 | 6 | 3.097253  | -1.257151 | -0.276078 |
| 1                               | 4.203593  | -3.451194 | -1.900562 | 6 | 1.154639  | -3.132524 | -0.256418 |
| 6                               | 2.765925  | -4.586614 | 1.192802  | 6 | -0.238534 | -3.334145 | -0.275407 |
| 1                               | 2.884152  | -3.928663 | 2.038936  | 6 | -2.622601 | -2.066154 | -0.256716 |
| 6                               | 3.349942  | -5.817482 | 1.038750  | 6 | -3.244726 | -0.803398 | -0.276011 |
| 1                               | 4.003108  | -6.375715 | 1.689310  | 6 | -1.246338 | -6.735651 | 0.796735  |
| 7                               | 2.978678  | -6.305465 | -0.188842 | 1 | -1.355748 | -7.631261 | 1.385884  |
| 1                               | 3.208139  | -7.217333 | -0.544280 | 7 | -1.857401 | -6.608514 | -0.425481 |
| 6                               | 2.152129  | -5.404933 | -0.809077 | 1 | -2.480957 | -7.281230 | -0.836458 |
| 1                               | 1.704431  | -5.613343 | -1.767405 | 6 | -1.568635 | -5.381893 | -0.957239 |
| 6                               | -0.548778 | -5.581030 | 1.036353  | 1 | -1.983593 | -5.063634 | -1.899662 |
| 1                               | 0.060622  | -5.373167 | 1.901553  | 6 | -3.507370 | -4.047578 | 1.192842  |
| 7                               | -5.077198 | -4.780892 | -0.187900 | 1 | -2.844616 | -3.956733 | 2.038610  |
| 1                               | -5.873760 | -5.280824 | -0.542936 | 6 | -4.497898 | -4.983079 | 1.039484  |
| 6                               | -4.476149 | -3.716793 | -0.808635 | 1 | -4.826642 | -5.776719 | 1.690288  |
| Indole (I)                      |           |           |           |   |           |           |           |
| 6                               | 0.247008  | -0.667645 | -0.000081 | 1 | 1.873352  | -2.033154 | -0.000891 |
| 6                               | 0.248232  | 0.746120  | 0.000002  | 6 | -2.127342 | -0.716726 | 0.000143  |
| 6                               | 1.623146  | 1.162937  | -0.000279 | 6 | -0.933942 | -1.414208 | -0.000207 |
| 6                               | 2.381382  | 0.029526  | 0.000211  | 1 | -3.062761 | -1.263145 | 0.000076  |
| 7                               | 1.560587  | -1.077463 | 0.000236  | 1 | -0.916149 | -2.497933 | -0.000504 |
| 6                               | -0.980210 | 1.424700  | -0.000010 | 1 | 3.453619  | -0.086045 | 0.000523  |
| 6                               | -2.151030 | 0.691463  | 0.000204  | 1 | 1.996710  | 2.174128  | -0.000354 |
| 1                               | -3.105886 | 1.203135  | -0.000205 | 1 | -1.006455 | 2.508249  | -0.000190 |
| <sup>2</sup> J <sub>C3N1'</sub> |           |           |           |   |           |           |           |
| 6                               | -2.774849 | -0.820719 | 0.220395  | 6 | 2.834315  | 0.875683  | 0.233352  |

|   |           |           |           |   |          |           |           |
|---|-----------|-----------|-----------|---|----------|-----------|-----------|
| 6 | -1.804279 | 0.181202  | 0.005123  | 6 | 2.178927 | 1.973272  | 0.888019  |
| 6 | -0.572948 | -0.325995 | 0.543905  | 6 | 0.875297 | 1.612852  | 1.055891  |
| 6 | -0.822917 | -1.571516 | 1.046326  | 7 | 0.662310 | 0.345285  | 0.543799  |
| 7 | -2.149581 | -1.877077 | 0.843129  | 6 | 4.145706 | 0.642296  | -0.206508 |
| 6 | -2.168203 | 1.372078  | -0.639936 | 6 | 4.440406 | -0.554963 | -0.831037 |
| 6 | -3.480639 | 1.531099  | -1.039650 | 6 | 3.446808 | -1.531502 | -1.034712 |
| 1 | -2.590700 | -2.740348 | 1.110729  | 6 | 2.145223 | -1.332601 | -0.610889 |
| 6 | -4.438964 | 0.523919  | -0.809660 | 1 | 3.706627 | -2.455971 | -1.536368 |
| 6 | -4.103430 | -0.661345 | -0.182911 | 1 | 1.375551 | -2.077101 | -0.774675 |
| 1 | -5.460287 | 0.681159  | -1.134579 | 1 | 0.053996 | 2.141172  | 1.515713  |
| 1 | -4.841315 | -1.436437 | -0.012325 | 1 | 2.623448 | 2.904972  | 1.198911  |
| 1 | -0.150850 | -2.260872 | 1.532234  | 1 | 4.913539 | 1.393217  | -0.059662 |
| 1 | -1.427858 | 2.142279  | -0.824434 | 1 | 5.449409 | -0.747815 | -1.174899 |
| 1 | -3.782529 | 2.441699  | -1.542244 | 6 | 1.856524 | -0.124328 | 0.027807  |

<sup>3</sup>I<sub>C3N1'</sub>

|   |           |           |           |   |           |           |           |
|---|-----------|-----------|-----------|---|-----------|-----------|-----------|
| 6 | 4.315658  | -0.878275 | 0.489953  | 1 | -2.500754 | 3.102203  | -0.804211 |
| 6 | 2.972550  | -0.859164 | 0.057403  | 1 | -1.175079 | 5.004633  | -1.681643 |
| 6 | 2.403255  | 0.357480  | 0.565470  | 6 | -3.050302 | -0.864350 | 0.102355  |
| 6 | 3.378582  | 1.014957  | 1.260261  | 6 | -4.412190 | -0.864507 | 0.482086  |
| 7 | 4.537779  | 0.276390  | 1.206356  | 6 | -4.659990 | 0.381923  | 1.150807  |
| 6 | 2.478803  | -1.916912 | -0.719748 | 6 | -3.482392 | 1.068245  | 1.157791  |
| 6 | 3.329811  | -2.958448 | -1.032550 | 7 | -2.496561 | 0.328946  | 0.528889  |
| 1 | 5.409755  | 0.538784  | 1.633558  | 6 | -5.206102 | -1.975139 | 0.160003  |
| 6 | 4.666213  | -2.965539 | -0.585744 | 6 | -4.634993 | -3.032689 | -0.522358 |
| 6 | 5.178331  | -1.931567 | 0.174889  | 6 | -3.278977 | -3.005325 | -0.900019 |
| 1 | 5.306670  | -3.799145 | -0.846881 | 6 | -2.469362 | -1.926180 | -0.594930 |
| 1 | 6.207807  | -1.937815 | 0.512996  | 1 | -2.862084 | -3.845799 | -1.441877 |
| 1 | 3.328946  | 1.954203  | 1.787902  | 1 | -3.234461 | 2.032848  | 1.573774  |
| 1 | 1.452966  | -1.906472 | -1.070557 | 1 | -5.591443 | 0.718367  | 1.576844  |
| 1 | 2.969879  | -3.784429 | -1.633367 | 1 | -6.252595 | -1.999282 | 0.441647  |
| 6 | 0.669675  | 1.984654  | -0.183225 | 1 | -5.237033 | -3.896869 | -0.775904 |
| 6 | -0.741616 | 1.992318  | -0.212995 | 1 | -1.427710 | -1.897793 | -0.890742 |
| 6 | -1.164654 | 0.744639  | 0.358214  | 6 | 0.735316  | 4.121294  | -1.216268 |
| 6 | -0.042636 | 0.047235  | 0.704200  | 6 | 1.425610  | 3.045892  | -0.687933 |
| 7 | 1.077039  | 0.786513  | 0.374115  | 1 | 1.289839  | 4.960864  | -1.617835 |
| 6 | -1.417543 | 3.091939  | -0.760372 | 1 | 2.508250  | 3.017681  | -0.674137 |
| 6 | -0.672735 | 4.146443  | -1.252421 | 1 | 0.057393  | -0.918462 | 1.175698  |

<sup>4</sup>I<sub>C3N1'</sub>

|   |           |           |          |   |          |           |           |
|---|-----------|-----------|----------|---|----------|-----------|-----------|
| 6 | -6.217814 | 0.036378  | 0.881752 | 6 | 1.844290 | -0.099777 | 0.531373  |
| 6 | -4.971586 | 0.297304  | 0.273769 | 7 | 0.645183 | 0.398564  | 0.060374  |
| 6 | -4.076435 | -0.725925 | 0.735604 | 6 | 2.709265 | 3.232248  | -0.672879 |
| 6 | -4.777707 | -1.546023 | 1.573548 | 6 | 1.826105 | 4.127897  | -1.244380 |
| 7 | -6.073904 | -1.094402 | 1.654673 | 6 | 0.464721 | 3.803669  | -1.405087 |

|   |           |           |           |   |           |           |           |
|---|-----------|-----------|-----------|---|-----------|-----------|-----------|
| 6 | -4.837191 | 1.391119  | -0.593104 | 6 | -0.040462 | 2.582775  | -0.997388 |
| 6 | -5.939209 | 2.191848  | -0.819405 | 1 | -0.200508 | 4.525564  | -1.863305 |
| 1 | -6.800363 | -1.521316 | 2.204111  | 1 | 1.894786  | -1.084945 | 0.969231  |
| 6 | -7.174844 | 1.921664  | -0.198093 | 1 | 3.760722  | 3.473243  | -0.564309 |
| 6 | -7.334225 | 0.845766  | 0.654450  | 1 | 2.183156  | 5.092794  | -1.582848 |
| 1 | -8.019135 | 2.570721  | -0.395855 | 1 | -1.084136 | 2.327653  | -1.133088 |
| 1 | -8.287130 | 0.638222  | 1.126725  | 6 | 5.034794  | -0.313908 | 0.314533  |
| 1 | -4.445959 | -2.417452 | 2.115504  | 6 | 6.302219  | -0.048402 | 0.882079  |
| 1 | -3.888421 | 1.592038  | -1.077979 | 6 | 6.180043  | 1.175441  | 1.623313  |
| 1 | -5.859148 | 3.040527  | -1.487330 | 6 | 4.889212  | 1.592357  | 1.489005  |
| 6 | -2.131933 | -1.938152 | -0.246125 | 7 | 4.180825  | 0.702339  | 0.701953  |
| 6 | -0.771978 | -1.629329 | -0.463785 | 6 | 7.356309  | -0.940195 | 0.634388  |
| 6 | -0.570263 | -0.309354 | 0.063325  | 6 | 7.125640  | -2.047432 | -0.160078 |
| 6 | -1.763969 | 0.123852  | 0.566124  | 6 | 5.857521  | -2.284938 | -0.723988 |
| 7 | -2.720764 | -0.853842 | 0.378250  | 6 | 4.797460  | -1.426017 | -0.496643 |
| 6 | 0.054834  | -2.559661 | -1.109394 | 1 | 5.710080  | -3.156746 | -1.350124 |
| 6 | -0.492774 | -3.762317 | -1.511664 | 1 | 3.822558  | -1.599689 | -0.935799 |
| 6 | -1.853133 | -4.052539 | -1.288396 | 1 | 4.382867  | 2.452649  | 1.899535  |
| 6 | -2.690761 | -3.150049 | -0.659530 | 1 | 8.336986  | -0.759059 | 1.059287  |
| 1 | -2.252826 | -5.002149 | -1.623024 | 1 | 7.931186  | -2.744142 | -0.358215 |
| 1 | -3.740327 | -3.364510 | -0.499730 | 1 | 6.951018  | 1.674677  | 2.187822  |
| 1 | -2.016287 | 1.049874  | 1.059770  | 6 | 0.852857  | 1.681482  | -0.412238 |
| 1 | 1.097747  | -2.330310 | -1.296973 | 6 | 2.220539  | 1.989750  | -0.245577 |
| 1 | 0.128360  | -4.493947 | -2.013488 | 6 | 2.824372  | 0.835086  | 0.356713  |

<sup>5</sup>I<sub>C3N1'</sub>

|   |          |           |           |   |           |           |           |
|---|----------|-----------|-----------|---|-----------|-----------|-----------|
| 6 | 7.660084 | -1.282100 | 1.287113  | 1 | 1.259732  | -3.741810 | -2.789677 |
| 6 | 6.480599 | -1.145030 | 0.525124  | 1 | 0.069585  | 1.730256  | 0.749826  |
| 6 | 5.789353 | -0.003823 | 1.055039  | 1 | -2.517411 | -1.989521 | -1.723330 |
| 6 | 6.540263 | 0.500113  | 2.079058  | 1 | -1.205671 | -3.768377 | -2.843560 |
| 7 | 7.675925 | -0.263287 | 2.213764  | 1 | 2.491619  | -1.942227 | -1.610687 |
| 6 | 6.216486 | -2.047228 | -0.515121 | 6 | -3.051064 | 1.821722  | -0.341151 |
| 6 | 7.125405 | -3.058063 | -0.757224 | 6 | -4.416555 | 1.776800  | 0.014904  |
| 1 | 8.400081 | -0.104879 | 2.893802  | 6 | -4.653257 | 0.462684  | 0.541775  |
| 6 | 8.294955 | -3.185831 | 0.018477  | 6 | -3.471784 | -0.220826 | 0.493002  |
| 6 | 8.581082 | -2.304784 | 1.044053  | 7 | -2.493873 | 0.590663  | -0.047845 |
| 1 | 8.986348 | -3.991459 | -0.196254 | 6 | -5.228440 | 2.898227  | -0.205636 |
| 1 | 9.483758 | -2.403364 | 1.635296  | 6 | -4.659056 | 4.025476  | -0.765918 |
| 1 | 6.346671 | 1.346180  | 2.719246  | 6 | -3.295280 | 4.052399  | -1.118095 |
| 1 | 5.320975 | -1.941904 | -1.117281 | 6 | -2.475065 | 2.957757  | -0.915782 |
| 1 | 6.943292 | -3.764879 | -1.557225 | 1 | -2.881382 | 4.949388  | -1.562766 |
| 6 | 4.317747 | 1.765286  | 0.093999  | 1 | -1.430011 | 2.971558  | -1.199737 |
| 6 | 2.966833 | 1.825491  | -0.310702 | 1 | -3.236538 | -1.224333 | 0.813232  |
| 6 | 2.406297 | 0.534116  | -0.030864 | 1 | -6.281761 | 2.869664  | 0.049693  |

|   |           |           |           |   |           |           |           |
|---|-----------|-----------|-----------|---|-----------|-----------|-----------|
| 6 | 3.392102  | -0.237522 | 0.515370  | 1 | -5.269058 | 4.901973  | -0.946885 |
| 7 | 4.558153  | 0.497131  | 0.590478  | 6 | -6.529478 | -1.174882 | 0.608788  |
| 6 | 2.465344  | 3.006001  | -0.877125 | 6 | -7.733998 | -1.275385 | 1.342252  |
| 6 | 3.317154  | 4.084107  | -1.018705 | 6 | -7.792284 | -0.131297 | 2.208289  |
| 6 | 4.663771  | 4.004896  | -0.612291 | 6 | -6.660505 | 0.594255  | 1.982267  |
| 6 | 5.184094  | 2.850938  | -0.056301 | 7 | -5.883427 | -0.023284 | 1.019073  |
| 1 | 5.307320  | 4.866115  | -0.744835 | 6 | -8.581651 | -2.368162 | 1.107089  |
| 1 | 6.222721  | 2.782405  | 0.243136  | 6 | -8.216660 | -3.309399 | 0.163032  |
| 1 | 3.361345  | -1.255327 | 0.873328  | 6 | -7.017283 | -3.181873 | -0.563520 |
| 1 | 1.433939  | 3.061935  | -1.206716 | 6 | -6.159130 | -2.117826 | -0.352915 |
| 1 | 2.950347  | 5.004672  | -1.455642 | 1 | -6.762774 | -3.931335 | -1.303360 |
| 6 | 0.661434  | -0.970367 | -0.982975 | 1 | -6.311319 | 1.509943  | 2.434614  |
| 6 | -0.749972 | -0.969038 | -1.006824 | 1 | -9.510048 | -2.468392 | 1.657651  |
| 6 | -1.163124 | 0.194857  | -0.276051 | 1 | -8.862149 | -4.158367 | -0.027163 |
| 6 | -0.036748 | 0.836667  | 0.153933  | 1 | -8.571573 | 0.113841  | 2.911803  |
| 7 | 1.076817  | 0.144019  | -0.276933 | 1 | -5.239545 | -2.010859 | -0.915344 |
| 6 | -1.433815 | -1.987199 | -1.685904 | 6 | 0.711250  | -2.957642 | -2.282007 |
| 6 | -0.697016 | -2.973017 | -2.312918 | 6 | 1.408968  | -1.961763 | -1.624028 |

<sup>6</sup>I<sub>C3N1'</sub>

|   |            |           |           |   |           |           |           |
|---|------------|-----------|-----------|---|-----------|-----------|-----------|
| 6 | -9.168551  | 0.514621  | 2.261977  | 1 | -1.295039 | 4.399145  | -2.862472 |
| 6 | -8.141031  | 0.624294  | 1.301085  | 1 | -4.611172 | 2.088893  | -1.380766 |
| 6 | -7.276870  | -0.503565 | 1.507524  | 6 | 1.337116  | -1.239517 | -1.396156 |
| 6 | -7.785994  | -1.235750 | 2.542584  | 6 | 2.730170  | -1.122557 | -1.200703 |
| 7 | -8.934386  | -0.629148 | 2.992439  | 6 | 2.936408  | 0.121292  | -0.515367 |
| 6 | -8.145098  | 1.699423  | 0.400710  | 6 | 1.712686  | 0.696658  | -0.321802 |
| 6 | -9.161418  | 2.630007  | 0.489875  | 7 | 0.735453  | -0.116027 | -0.859701 |
| 1 | -9.507984  | -0.966570 | 3.746831  | 6 | 3.584375  | -2.126910 | -1.677375 |
| 6 | -10.176024 | 2.509080  | 1.460407  | 6 | 3.029244  | -3.212688 | -2.326103 |
| 6 | -10.197594 | 1.455476  | 2.354328  | 6 | 1.636692  | -3.312077 | -2.515187 |
| 1 | -10.957513 | 3.257740  | 1.504404  | 6 | 0.773792  | -2.332825 | -2.059330 |
| 1 | -10.981522 | 1.362940  | 3.096610  | 1 | 1.233886  | -4.173334 | -3.034312 |
| 1 | -7.412107  | -2.143892 | 2.988320  | 1 | -0.295757 | -2.400480 | -2.215592 |
| 1 | -7.369159  | 1.787082  | -0.351570 | 1 | 1.447982  | 1.619437  | 0.171502  |
| 1 | -9.185659  | 3.466888  | -0.197000 | 1 | 4.657332  | -2.042084 | -1.546237 |
| 6 | -5.864042  | -1.953814 | 0.053157  | 1 | 3.671293  | -3.999204 | -2.703087 |
| 6 | -4.596770  | -1.824069 | -0.554173 | 6 | 4.694986  | 1.886578  | -0.422035 |
| 6 | -4.095951  | -0.536676 | -0.165330 | 6 | 5.982343  | 1.979671  | 0.150487  |
| 6 | -5.034233  | 0.050852  | 0.634864  | 6 | 6.216277  | 0.732949  | 0.822509  |
| 7 | -6.114605  | -0.796926 | 0.768624  | 6 | 5.108105  | -0.045678 | 0.645628  |
| 6 | -4.106324  | -2.859229 | -1.362842 | 7 | 4.181411  | 0.640371  | -0.114515 |
| 6 | -4.885754  | -3.986120 | -1.537258 | 6 | 6.741769  | 3.143378  | -0.035297 |
| 6 | -6.150000  | -4.097314 | -0.925524 | 6 | 6.198147  | 4.175211  | -0.775925 |
| 6 | -6.658499  | -3.088718 | -0.128346 | 6 | 4.912898  | 4.064951  | -1.342036 |

|   |           |           |           |   |           |           |           |
|---|-----------|-----------|-----------|---|-----------|-----------|-----------|
| 1 | -6.739311 | -4.991400 | -1.088952 | 6 | 4.146498  | 2.925737  | -1.178200 |
| 1 | -7.636163 | -3.165694 | 0.331312  | 1 | 4.518563  | 4.889535  | -1.923580 |
| 1 | -5.020701 | 1.005819  | 1.137787  | 1 | 4.890780  | -1.037561 | 1.011432  |
| 1 | -3.140726 | -2.766720 | -1.847312 | 1 | 7.737775  | 3.219950  | 0.386094  |
| 1 | -4.526463 | -4.796743 | -2.159100 | 1 | 6.768901  | 5.082197  | -0.933200 |
| 6 | -2.636657 | 1.233269  | -1.144740 | 1 | 3.164082  | 2.833483  | -1.624697 |
| 6 | -1.248725 | 1.371922  | -1.362091 | 6 | 8.151565  | -0.745394 | 1.347939  |
| 6 | -0.641743 | 0.175652  | -0.853160 | 6 | 9.222206  | -0.689471 | 2.269755  |
| 6 | -1.637721 | -0.618896 | -0.360726 | 6 | 9.068112  | 0.528231  | 3.015202  |
| 7 | -2.853245 | 0.008475  | -0.539984 | 6 | 7.947900  | 1.143620  | 2.540905  |
| 6 | -0.756192 | 2.524851  | -1.989365 | 7 | 7.379301  | 0.386549  | 1.532752  |
| 6 | -1.654019 | 3.501136  | -2.374982 | 6 | 10.160365 | -1.732348 | 2.282969  |
| 6 | -3.036529 | 3.345401  | -2.152828 | 6 | 10.012681 | -2.779009 | 1.392458  |
| 6 | -3.547616 | 2.215902  | -1.540943 | 6 | 8.944333  | -2.807153 | 0.475762  |
| 1 | -3.714571 | 4.127019  | -2.473408 | 6 | 8.001737  | -1.795747 | 0.439439  |
| 1 | -1.583715 | -1.583417 | 0.120732  | 1 | 8.860484  | -3.636738 | -0.216044 |
| 1 | 0.306233  | 2.636553  | -2.175086 | 1 | 7.474210  | 2.066589  | 2.838814  |
| 1 | 9.704138  | 0.892843  | 3.805667  | 1 | 10.989326 | -1.713162 | 2.981234  |
| 1 | 7.182965  | -1.809004 | -0.269622 | 1 | 10.729803 | -3.591005 | 1.393567  |

$^2I_{C3C2'}$

|   |          |          |          |   |          |          |          |
|---|----------|----------|----------|---|----------|----------|----------|
| 6 | 3.234273 | 0.584835 | -0.14017 | 1 | 1.142122 | -2.01341 | 0.594998 |
| 6 | 2.018791 | -0.1068  | 0.059736 | 1 | 3.331085 | -3.14973 | 0.744329 |
| 6 | 0.955752 | 0.855487 | -0.10692 | 6 | -2.38894 | -0.53752 | -0.32047 |
| 6 | 1.554729 | 2.053062 | -0.3911  | 6 | -2.7088  | 0.673685 | 0.33724  |
| 7 | 2.920242 | 1.898813 | -0.40444 | 6 | -1.4762  | 1.382582 | 0.528621 |
| 6 | 2.058002 | -1.46961 | 0.392778 | 6 | -0.47591 | 0.613346 | -0.00511 |
| 6 | 3.285266 | -2.09885 | 0.486108 | 7 | -1.02432 | -0.55652 | -0.50117 |
| 1 | 3.583538 | 2.626541 | -0.60986 | 6 | -4.04869 | 0.933228 | 0.661616 |
| 6 | 4.483247 | -1.3942  | 0.262693 | 6 | -5.01473 | 0.00525  | 0.318544 |
| 6 | 4.476441 | -0.04641 | -0.04565 | 6 | -4.67374 | -1.18833 | -0.34426 |
| 1 | 5.428949 | -1.91617 | 0.343515 | 6 | -3.36002 | -1.47704 | -0.67014 |
| 1 | 5.399443 | 0.49926  | -0.20299 | 1 | -5.45344 | -1.89481 | -0.60217 |
| 1 | 1.098562 | 3.007101 | -0.60395 | 1 | -3.09582 | -2.39825 | -1.17643 |
| 1 | -1.33497 | 2.324839 | 1.034168 | 1 | -4.3205  | 1.850318 | 1.171534 |
| 1 | -0.51432 | -1.22441 | -1.05666 | 1 | -6.053   | 0.196297 | 0.561551 |

$^3I_{C3C2'}$

|   |          |          |          |   |          |          |          |
|---|----------|----------|----------|---|----------|----------|----------|
| 6 | 2.952502 | -2.30479 | 0.541251 | 6 | 0.928708 | 3.04167  | 0.095027 |
| 6 | 2.792275 | -0.99907 | 0.025736 | 6 | -0.41071 | 2.604591 | 0.006313 |
| 6 | 1.515854 | -0.51684 | 0.498313 | 6 | -0.39394 | 1.167608 | 0.110957 |
| 6 | 0.972249 | -1.52329 | 1.254792 | 6 | 0.923336 | 0.792158 | 0.265788 |
| 7 | 1.825774 | -2.59642 | 1.277976 | 7 | 1.71852  | 1.920857 | 0.229884 |
| 6 | 3.791789 | -0.46907 | -0.80551 | 6 | -1.42684 | 3.550901 | -0.18404 |
| 6 | 4.913256 | -1.23248 | -1.071   | 6 | -1.08525 | 4.889612 | -0.25133 |

|   |          |          |          |   |          |          |          |
|---|----------|----------|----------|---|----------|----------|----------|
| 1 | 1.657516 | -3.45644 | 1.772626 | 6 | 0.254129 | 5.305839 | -0.14017 |
| 6 | 5.059681 | -2.52409 | -0.53114 | 6 | 1.278877 | 4.390599 | 0.026827 |
| 6 | 4.082684 | -3.08001 | 0.273909 | 1 | 0.488594 | 6.362112 | -0.19322 |
| 1 | 5.950683 | -3.09655 | -0.75821 | 1 | 2.31216  | 4.709265 | 0.099296 |
| 1 | 4.18897  | -4.07957 | 0.678759 | 1 | -2.45793 | 3.23177  | -0.28173 |
| 1 | 0.02969  | -1.54338 | 1.780946 | 1 | -1.85913 | 5.633711 | -0.39538 |
| 1 | 3.676633 | 0.512932 | -1.25047 | 1 | 2.697311 | 1.919438 | 0.469232 |
| 1 | 5.69135  | -0.83676 | -1.71212 | 6 | -2.72539 | -1.5478  | -0.5365  |
| 6 | -3.15289 | -2.77058 | -1.05775 | 6 | -3.56577 | -0.72571 | 0.25275  |
| 1 | -4.81281 | -4.11053 | -1.16363 | 6 | -2.79841 | 0.432639 | 0.609278 |
| 1 | -2.49699 | -3.38351 | -1.66521 | 6 | -1.55378 | 0.287985 | 0.049478 |
| 1 | -5.5357  | -0.54882 | 1.127564 | 7 | -1.51538 | -0.9058  | -0.64702 |
| 1 | -6.30693 | -2.71311 | 0.215239 | 6 | -4.87223 | -1.15832 | 0.524754 |
| 1 | -3.10897 | 1.257968 | 1.230577 | 6 | -5.29966 | -2.36974 | 0.012504 |
| 1 | -0.7129  | -1.23079 | -1.16228 | 6 | -4.44779 | -3.16817 | -0.77321 |

<sup>4</sup>I<sub>C3C2'</sub>

|   |          |          |          |   |          |          |          |
|---|----------|----------|----------|---|----------|----------|----------|
| 6 | 3.219152 | -1.46586 | -2.02377 | 1 | -5.29474 | 2.674206 | -3.71118 |
| 6 | 3.188597 | -0.28528 | -1.2489  | 1 | -3.20632 | 3.739664 | -2.90578 |
| 6 | 1.878356 | -0.21956 | -0.64073 | 1 | -4.47331 | -0.87428 | -1.43629 |
| 6 | 1.191218 | -1.32884 | -1.06568 | 1 | -5.92129 | 0.405282 | -2.97263 |
| 7 | 1.989476 | -2.07072 | -1.89465 | 1 | -0.95762 | 3.195371 | -1.26444 |
| 6 | 4.315027 | 0.552551 | -1.24755 | 6 | -1.14032 | -2.47789 | 1.819549 |
| 6 | 5.428278 | 0.179064 | -1.97809 | 6 | -1.88259 | -3.20402 | 0.857614 |
| 1 | 1.71997  | -2.94549 | -2.31299 | 6 | -2.31353 | -2.26017 | -0.13265 |
| 6 | 5.442944 | -1.01343 | -2.72426 | 6 | -1.83953 | -1.02479 | 0.24307  |
| 6 | 4.339633 | -1.84625 | -2.76415 | 7 | -1.13552 | -1.16153 | 1.423809 |
| 1 | 6.330465 | -1.27836 | -3.28575 | 6 | -2.03708 | -4.58875 | 1.026328 |
| 1 | 4.342932 | -2.75684 | -3.35163 | 6 | -1.46153 | -5.19909 | 2.125509 |
| 1 | 0.192944 | -1.66157 | -0.82607 | 6 | -0.73003 | -4.4555  | 3.070692 |
| 1 | 4.307211 | 1.490582 | -0.70387 | 6 | -0.55984 | -3.08921 | 2.932433 |
| 1 | 6.302627 | 0.818329 | -1.98599 | 1 | -0.29328 | -4.96233 | 3.92273  |
| 6 | 1.694837 | 2.303786 | 1.956204 | 1 | 0.001922 | -2.51491 | 3.659791 |
| 6 | 0.366471 | 2.413211 | 1.492839 | 1 | -2.60295 | -5.16832 | 0.305829 |
| 6 | 0.208043 | 1.455572 | 0.425421 | 1 | -1.57516 | -6.26711 | 2.267246 |
| 6 | 1.42054  | 0.811784 | 0.276331 | 1 | -2.86981 | -2.47078 | -1.03191 |
| 7 | 2.308466 | 1.33392  | 1.196507 | 1 | -0.67972 | -0.3977  | 1.899732 |
| 6 | -0.49988 | 3.334831 | 2.098105 | 6 | -2.65918 | 2.000844 | -1.7348  |
| 6 | -0.01936 | 4.113637 | 3.135466 | 6 | -2.98111 | 0.68876  | -1.32296 |
| 6 | 1.308894 | 3.989715 | 3.583337 | 6 | -1.92525 | 0.255086 | -0.44016 |
| 6 | 2.182967 | 3.085779 | 3.003984 | 6 | -1.01957 | 1.292496 | -0.35515 |
| 1 | 1.65388  | 4.612659 | 4.399553 | 7 | -1.47703 | 2.343747 | -1.12303 |
| 1 | 3.204994 | 2.989634 | 3.35119  | 6 | -4.18016 | 0.113899 | -1.76841 |
| 1 | -1.52623 | 3.424198 | 1.758786 | 6 | -4.99224 | 0.838026 | -2.6221  |

|               |   |          |          |          |   |          |          |          |
|---------------|---|----------|----------|----------|---|----------|----------|----------|
|               | 1 | -0.67432 | 4.829611 | 3.61673  | 6 | -4.63844 | 2.134236 | -3.03944 |
|               | 1 | 3.231571 | 0.958759 | 1.349201 | 6 | -3.4739  | 2.735619 | -2.5982  |
| $^5I_{C3C2'}$ |   |          |          |          |   |          |          |          |
|               | 6 | -0.76758 | 1.493626 | 2.331444 | 6 | -0.91898 | 1.167588 | -1.17051 |
|               | 6 | 0.20762  | 0.487774 | 2.160821 | 6 | 0.239126 | 0.42213  | -1.29327 |
|               | 6 | 1.348455 | 1.113386 | 1.541041 | 7 | 1.257747 | 1.251254 | -1.71528 |
|               | 6 | 1.024793 | 2.435117 | 1.365348 | 6 | -1.26579 | 3.746483 | -1.44851 |
|               | 7 | -0.23456 | 2.669227 | 1.849847 | 6 | -0.58719 | 4.91775  | -1.74222 |
|               | 6 | -0.06773 | -0.81812 | 2.592473 | 6 | 0.775563 | 4.901648 | -2.09311 |
|               | 6 | -1.29601 | -1.07713 | 3.176294 | 6 | 1.488124 | 3.715149 | -2.13897 |
|               | 1 | -0.74888 | 3.521967 | 1.696756 | 1 | 1.275653 | 5.833133 | -2.32962 |
|               | 6 | -2.25817 | -0.05937 | 3.332801 | 1 | 2.540655 | 3.699264 | -2.39794 |
|               | 6 | -2.01094 | 1.234088 | 2.913201 | 1 | -2.31306 | 3.769886 | -1.17137 |
|               | 1 | -3.21869 | -0.29961 | 3.772012 | 1 | -1.11289 | 5.864514 | -1.70813 |
|               | 1 | -2.75814 | 2.011525 | 3.018655 | 1 | 2.208427 | 0.940978 | -1.8435  |
|               | 1 | 1.580989 | 3.22207  | 0.877548 | 6 | -3.72746 | -0.60625 | 0.294041 |
|               | 1 | 0.671757 | -1.60227 | 2.469131 | 6 | -4.44909 | 0.362517 | -0.44499 |
|               | 1 | -1.52634 | -2.07929 | 3.51846  | 6 | -3.47759 | 1.184515 | -1.10387 |
|               | 6 | 4.786206 | 0.08135  | 0.925363 | 6 | -2.23426 | 0.70679  | -0.75437 |
|               | 6 | 4.125994 | -0.94178 | 0.208499 | 7 | -2.39349 | -0.37311 | 0.085866 |
|               | 6 | 2.710195 | -0.69175 | 0.330449 | 6 | -5.85207 | 0.335957 | -0.4063  |
|               | 6 | 2.564809 | 0.442473 | 1.103883 | 6 | -6.48466 | -0.62926 | 0.355479 |
|               | 7 | 3.814877 | 0.912065 | 1.440579 | 6 | -5.74581 | -1.58188 | 1.083754 |
|               | 6 | 4.891576 | -1.90255 | -0.46895 | 6 | -4.36214 | -1.58499 | 1.06205  |
|               | 6 | 6.270748 | -1.83693 | -0.384   | 1 | -6.27157 | -2.32874 | 1.666756 |
|               | 6 | 6.906906 | -0.82446 | 0.356823 | 1 | -3.78732 | -2.32096 | 1.612334 |
|               | 6 | 6.176822 | 0.150703 | 1.013887 | 1 | -6.42956 | 1.062476 | -0.96683 |
|               | 1 | 7.988626 | -0.80275 | 0.406864 | 1 | -7.5671  | -0.65941 | 0.392729 |
|               | 1 | 6.667058 | 0.939637 | 1.572085 | 1 | -3.66806 | 1.988404 | -1.79693 |
|               | 1 | 4.410075 | -2.67473 | -1.05887 | 1 | -1.63532 | -0.8489  | 0.555309 |
|               | 1 | 6.874861 | -2.57299 | -0.90019 | 6 | -1.13823 | -4.73349 | -1.86906 |
|               | 1 | 3.965403 | 1.663263 | 2.095001 | 6 | 0.043336 | -4.57634 | -1.16717 |
|               | 6 | 0.488095 | -3.27111 | -0.94768 | 1 | -1.51749 | -5.73129 | -2.05382 |
|               | 6 | -0.22295 | -2.14409 | -1.41185 | 1 | 0.601192 | -5.43108 | -0.8029  |
|               | 6 | 0.525019 | -0.97962 | -1.00666 | 1 | -1.9747  | -1.47846 | -2.49393 |
|               | 6 | 1.635798 | -1.43197 | -0.31966 | 1 | -2.77904 | -3.78464 | -2.8944  |
|               | 7 | 1.616926 | -2.81038 | -0.30319 | 1 | 2.272609 | -3.37311 | 0.215285 |
|               | 6 | -1.41226 | -2.33223 | -2.13195 | 6 | 0.802809 | 2.539827 | -1.82549 |
|               | 6 | -1.85732 | -3.62242 | -2.34941 | 6 | -0.57238 | 2.528153 | -1.49553 |
| $^6I_{C3C2'}$ |   |          |          |          |   |          |          |          |
|               | 6 | -0.72829 | 0.267245 | 3.106643 | 6 | 1.949795 | -2.52521 | 0.878221 |
|               | 6 | -1.87166 | 0.543224 | 2.325063 | 6 | 1.907822 | -3.88972 | 1.106303 |
|               | 6 | -2.3905  | -0.72545 | 1.881561 | 6 | 0.836039 | -4.67526 | 0.640397 |



|   |          |          |          |   |          |          |          |
|---|----------|----------|----------|---|----------|----------|----------|
| 6 | -1.56107 | -1.68975 | 2.395656 | 6 | -0.21986 | -4.10669 | -0.051   |
| 7 | -0.57379 | -1.10093 | 3.139958 | 1 | 0.841128 | -5.74343 | 0.821479 |
| 6 | -2.27631 | 1.873792 | 2.142082 | 1 | -1.04887 | -4.70635 | -0.40939 |
| 6 | -1.53518 | 2.879202 | 2.739614 | 1 | 2.788833 | -1.93214 | 1.224041 |
| 1 | 0.236896 | -1.58855 | 3.487017 | 1 | 2.722761 | -4.36808 | 1.636021 |
| 6 | -0.39491 | 2.583166 | 3.513134 | 1 | -2.00344 | -2.16587 | -1.21073 |
| 6 | 0.023905 | 1.279907 | 3.706741 | 6 | 1.719009 | 2.772655 | 0.706299 |
| 1 | 0.173405 | 3.393754 | 3.952771 | 6 | 2.973281 | 2.202718 | 0.388276 |
| 1 | 0.906754 | 1.054779 | 4.293011 | 6 | 2.724304 | 0.835371 | 0.008877 |
| 1 | -1.56953 | -2.759   | 2.244112 | 6 | 1.36028  | 0.629631 | 0.119427 |
| 1 | -3.15169 | 2.101647 | 1.543363 | 7 | 0.77024  | 1.799534 | 0.53438  |
| 1 | -1.83398 | 3.913025 | 2.611811 | 6 | 4.12082  | 3.009491 | 0.438071 |
| 6 | -5.50118 | -1.78541 | 0.313278 | 6 | 3.991813 | 4.331261 | 0.825336 |
| 6 | -5.06022 | -0.88334 | -0.68059 | 6 | 2.735047 | 4.874172 | 1.152977 |
| 6 | -3.79716 | -0.34959 | -0.2313  | 6 | 1.584174 | 4.108303 | 1.091063 |
| 6 | -3.52675 | -0.9273  | 0.992667 | 1 | 2.666775 | 5.915222 | 1.445273 |
| 7 | -4.5434  | -1.80287 | 1.303877 | 1 | 0.610743 | 4.526605 | 1.317577 |
| 6 | -5.83169 | -0.71548 | -1.84023 | 1 | 5.088677 | 2.610511 | 0.154606 |
| 6 | -7.0194  | -1.41476 | -1.9572  | 1 | 4.868808 | 4.966053 | 0.865289 |
| 6 | -7.45238 | -2.28877 | -0.94345 | 1 | -0.21662 | 1.899072 | 0.732292 |
| 6 | -6.69887 | -2.49217 | 0.19942  | 6 | 5.684269 | -1.22465 | -0.39945 |
| 1 | -8.38908 | -2.81906 | -1.06373 | 6 | 4.916267 | -1.74947 | -1.46709 |
| 1 | -7.02464 | -3.17701 | 0.973461 | 6 | 3.679517 | -1.02483 | -1.48954 |
| 1 | -5.4954  | -0.05939 | -2.63555 | 6 | 3.717101 | -0.11743 | -0.46415 |
| 1 | -7.62667 | -1.29448 | -2.84595 | 7 | 4.935581 | -0.23104 | 0.18817  |
| 1 | -4.62635 | -2.25873 | 2.198625 | 6 | 5.456015 | -2.78878 | -2.2395  |
| 6 | -2.40111 | 2.388304 | -2.17567 | 6 | 6.71651  | -3.26911 | -1.93435 |
| 6 | -1.20794 | 1.666163 | -1.96101 | 6 | 7.461237 | -2.73162 | -0.86822 |
| 6 | -1.55881 | 0.494805 | -1.19606 | 6 | 6.958271 | -1.70338 | -0.08946 |
| 6 | -2.92131 | 0.552016 | -0.97079 | 1 | 8.446205 | -3.12862 | -0.65372 |
| 7 | -3.42435 | 1.682834 | -1.57772 | 1 | 7.53261  | -1.28685 | 0.730135 |
| 6 | -0.00553 | 2.157208 | -2.49214 | 1 | 4.888899 | -3.20816 | -3.06253 |
| 6 | -0.02881 | 3.346342 | -3.19584 | 1 | 7.142123 | -4.07248 | -2.52363 |
| 6 | -1.22869 | 4.056674 | -3.38978 | 1 | 2.850416 | -1.16165 | -2.16624 |
| 6 | -2.42993 | 3.588258 | -2.88885 | 1 | 5.18375  | 0.290855 | 1.013019 |
| 1 | -1.21087 | 4.987492 | -3.94369 | 6 | -0.18016 | -2.72658 | -0.26208 |
| 1 | -3.35559 | 4.130202 | -3.0436  | 6 | 0.892743 | -1.92152 | 0.18064  |
| 1 | 0.92415  | 1.61897  | -2.34091 | 6 | 0.563233 | -0.55896 | -0.15707 |
| 1 | 0.89296  | 3.743563 | -3.60261 | 6 | -0.68536 | -0.58558 | -0.75249 |
| 1 | -4.3799  | 1.989424 | -1.4869  | 7 | -1.1048  | -1.89412 | -0.84314 |

<sup>2</sup>I<sub>C6N1'</sub>

|   |          |          |          |   |          |          |          |
|---|----------|----------|----------|---|----------|----------|----------|
| 6 | 3.066402 | -0.64657 | 0.335033 | 6 | -2.00346 | -0.07184 | -0.0205  |
| 6 | 2.74458  | 0.512521 | -0.4076  | 6 | -3.13748 | 0.764431 | 0.102286 |

|   |          |          |          |   |          |          |          |
|---|----------|----------|----------|---|----------|----------|----------|
| 6 | 3.963899 | 0.979348 | -1.00405 | 6 | -2.65875 | 2.0653   | 0.475938 |
| 6 | 4.948696 | 0.118806 | -0.61503 | 6 | -1.30129 | 1.975705 | 0.564366 |
| 7 | 4.416847 | -0.8627  | 0.190932 | 7 | -0.887   | 0.689606 | 0.272568 |
| 6 | 1.412772 | 0.949646 | -0.44505 | 6 | -4.40831 | 0.229247 | -0.15551 |
| 6 | 0.461787 | 0.244401 | 0.268451 | 6 | -4.51417 | -1.09622 | -0.53166 |
| 1 | 4.9353   | -1.61618 | 0.609157 | 6 | -3.36987 | -1.90505 | -0.6679  |
| 6 | 0.803581 | -0.90195 | 1.016101 | 6 | -2.10316 | -1.4084  | -0.41902 |
| 6 | 2.103709 | -1.36424 | 1.049189 | 1 | -3.48283 | -2.93674 | -0.97885 |
| 1 | 0.026896 | -1.40662 | 1.57775  | 1 | -1.2218  | -2.02667 | -0.53808 |
| 1 | 2.364981 | -2.24487 | 1.623917 | 1 | -0.56729 | 2.717336 | 0.839558 |
| 1 | 6.001595 | 0.12245  | -0.84817 | 1 | -5.29182 | 0.850759 | -0.06504 |
| 1 | 1.119536 | 1.814664 | -1.02865 | 1 | -5.48988 | -1.52152 | -0.73342 |
| 1 | 4.091074 | 1.840684 | -1.63929 | 1 | -3.2483  | 2.947568 | 0.666286 |

<sup>3</sup>I<sub>C6N1'</sub>

|   |          |          |          |   |          |          |          |
|---|----------|----------|----------|---|----------|----------|----------|
| 6 | -5.24791 | -1.31341 | -0.03539 | 6 | -0.59817 | 0.796628 | -0.25359 |
| 6 | -5.26663 | 0.004006 | 0.478235 | 6 | 0.219735 | 1.891604 | -0.61764 |
| 6 | -6.54147 | 0.18885  | 1.110693 | 6 | -0.64484 | 2.893571 | -1.16984 |
| 6 | -7.2289  | -0.9802  | 0.962461 | 6 | -1.91136 | 2.388631 | -1.12317 |
| 7 | -6.45725 | -1.8894  | 0.274084 | 7 | -1.90154 | 1.120581 | -0.57684 |
| 6 | -4.13518 | 0.81522  | 0.312835 | 6 | 1.602221 | 1.813545 | -0.39921 |
| 6 | -3.04758 | 0.30474  | -0.37031 | 6 | 2.117005 | 0.678586 | 0.199252 |
| 1 | -6.73598 | -2.8258  | 0.035119 | 6 | 1.282704 | -0.38991 | 0.587504 |
| 6 | -3.05112 | -1.00683 | -0.88859 | 6 | -0.07864 | -0.34685 | 0.360098 |
| 6 | -4.14501 | -1.83136 | -0.71855 | 1 | 1.728453 | -1.24138 | 1.087332 |
| 1 | -2.18332 | -1.35155 | -1.43776 | 1 | -0.72214 | -1.16092 | 0.670117 |
| 1 | -4.1482  | -2.83886 | -1.11715 | 1 | -2.84549 | 2.812925 | -1.45757 |
| 1 | -8.21956 | -1.24639 | 1.295119 | 1 | 2.265603 | 2.617598 | -0.69658 |
| 1 | -4.09727 | 1.819492 | 0.718876 | 1 | -0.36041 | 3.856302 | -1.56245 |
| 1 | -6.89864 | 1.074364 | 1.610585 | 6 | 4.350274 | -0.44602 | 0.098674 |
| 6 | 5.135749 | -2.47838 | -0.85    | 6 | 5.651827 | -0.12225 | 0.548649 |
| 1 | 3.773627 | 2.436154 | 1.491073 | 6 | 5.564848 | 1.15837  | 1.190945 |
| 1 | 7.706096 | -0.79212 | 0.634121 | 6 | 4.26146  | 1.551018 | 1.112896 |
| 1 | 7.236867 | -2.88605 | -0.59502 | 7 | 3.511088 | 0.591524 | 0.460154 |
| 1 | 6.364559 | 1.707903 | 1.660801 | 6 | 6.701227 | -1.01825 | 0.296118 |
| 6 | 4.079113 | -1.6172  | -0.61525 | 6 | 6.435132 | -2.18586 | -0.39348 |
| 1 | 3.082104 | -1.83528 | -0.978   | 1 | 4.960646 | -3.39501 | -1.40047 |

<sup>4</sup>I<sub>C6N1'</sub>

|   |          |          |          |   |          |          |          |
|---|----------|----------|----------|---|----------|----------|----------|
| 6 | 6.84277  | 2.355591 | -0.12456 | 6 | -1.97431 | -1.50045 | 0.297107 |
| 6 | 7.299722 | 1.104843 | 0.351858 | 6 | -3.09402 | -2.21899 | 0.777712 |
| 6 | 8.594202 | 1.324595 | 0.930757 | 6 | -2.5907  | -3.40726 | 1.402646 |
| 6 | 8.869374 | 2.653294 | 0.789242 | 6 | -1.23199 | -3.36813 | 1.283221 |
| 7 | 7.820292 | 3.280581 | 0.155383 | 7 | -0.84183 | -2.22105 | 0.621966 |
| 6 | 6.476857 | -0.02084 | 0.206675 | 6 | -4.37856 | -1.69267 | 0.582061 |

|   |          |          |          |   |          |          |          |
|---|----------|----------|----------|---|----------|----------|----------|
| 6 | 5.254836 | 0.128396 | -0.42148 | 6 | -4.51032 | -0.50171 | -0.10745 |
| 1 | 7.777916 | 4.260471 | -0.06773 | 6 | -3.38569 | 0.184632 | -0.60995 |
| 6 | 4.820682 | 1.380224 | -0.90406 | 1 | -0.47957 | -4.05639 | 1.636236 |
| 6 | 5.604017 | 2.506648 | -0.75224 | 1 | -5.25804 | -2.1965  | 0.966387 |
| 1 | 3.865629 | 1.439914 | -1.41184 | 1 | -3.16246 | -4.18075 | 1.889177 |
| 1 | 5.271025 | 3.46861  | -1.12324 | 6 | -2.10884 | -0.30095 | -0.40822 |
| 1 | 9.738741 | 3.21507  | 1.09182  | 1 | -1.2449  | 0.218266 | -0.80427 |
| 1 | 6.776573 | -0.9909  | 0.586198 | 1 | -3.54322 | 1.094616 | -1.17625 |
| 1 | 9.234773 | 0.590939 | 1.392267 | 6 | -6.22552 | 1.320003 | -0.06138 |
| 6 | 3.093163 | -1.11413 | -0.23073 | 6 | -7.58078 | 1.425273 | -0.45371 |
| 6 | 2.647043 | -2.40637 | -0.59514 | 6 | -7.96304 | 0.146276 | -0.98095 |
| 6 | 3.759152 | -3.0765  | -1.20305 | 6 | -6.86633 | -0.6595  | -0.89467 |
| 6 | 4.802841 | -2.19799 | -1.18715 | 7 | -5.80502 | 0.034198 | -0.34557 |
| 7 | 4.41703  | -1.00583 | -0.60753 | 6 | -8.25207 | 2.641872 | -0.26101 |
| 6 | 1.320049 | -2.77067 | -0.32839 | 6 | -7.57329 | 3.698609 | 0.315427 |
| 6 | 0.50031  | -1.86301 | 0.315669 | 6 | -6.23026 | 3.56535  | 0.716884 |
| 6 | 0.970415 | -0.59195 | 0.703997 | 1 | -6.7252  | -1.68423 | -1.20204 |
| 6 | 2.266198 | -0.20107 | 0.429868 | 1 | -9.2898  | 2.746092 | -0.55669 |
| 1 | 0.300471 | 0.06878  | 1.240889 | 1 | -8.08024 | 4.643542 | 0.469723 |
| 1 | 2.633688 | 0.769766 | 0.738575 | 1 | -8.9237  | -0.13238 | -1.38319 |
| 1 | 5.808415 | -2.30107 | -1.56485 | 6 | -5.53949 | 2.380424 | 0.538575 |
| 1 | 0.931294 | -3.73841 | -0.62404 | 1 | -4.51052 | 2.273052 | 0.859353 |
| 1 | 3.776068 | -4.07412 | -1.61083 | 1 | -5.72879 | 4.407268 | 1.179082 |

<sup>5</sup>I<sub>C6N1'</sub>

|   |          |          |          |   |          |          |          |
|---|----------|----------|----------|---|----------|----------|----------|
| 6 | 7.697973 | 3.665366 | -0.05277 | 1 | -3.83355 | -4.5368  | -1.31946 |
| 6 | 8.521892 | 2.622703 | 0.431367 | 1 | -7.69781 | -1.14938 | -0.73776 |
| 6 | 9.668297 | 3.240239 | 1.034099 | 1 | -6.4146  | -3.77934 | -1.52563 |
| 6 | 9.507394 | 4.588149 | 0.898389 | 6 | -4.04788 | -0.3194  | 0.441193 |
| 7 | 8.324154 | 4.851957 | 0.245642 | 1 | -3.04596 | -0.09143 | 0.783297 |
| 6 | 8.103607 | 1.294347 | 0.27041  | 1 | -4.90822 | 1.525652 | 1.112892 |
| 6 | 6.908747 | 1.050261 | -0.37977 | 6 | -7.40539 | 2.551328 | 0.011961 |
| 1 | 7.975324 | 5.768485 | 0.021805 | 6 | -8.63333 | 3.130865 | 0.409591 |
| 6 | 6.106225 | 2.101074 | -0.86962 | 6 | -9.39688 | 2.095159 | 1.045295 |
| 6 | 6.486659 | 3.417529 | -0.70281 | 6 | -8.63271 | 0.966107 | 1.013605 |
| 1 | 5.190754 | 1.856112 | -1.39445 | 7 | -7.42352 | 1.223955 | 0.397003 |
| 1 | 5.870779 | 4.225516 | -1.07927 | 6 | -8.87075 | 4.483678 | 0.12423  |
| 1 | 10.14654 | 5.395998 | 1.217486 | 6 | -7.9028  | 5.208136 | -0.54515 |
| 1 | 8.690477 | 0.468097 | 0.654842 | 6 | -6.69589 | 4.605779 | -0.94907 |
| 1 | 10.5014  | 2.746409 | 1.506979 | 1 | -8.82695 | -0.02145 | 1.402821 |
| 6 | 5.257528 | -0.82052 | -0.21709 | 1 | -9.80336 | 4.949442 | 0.421696 |
| 6 | 5.254361 | -2.18672 | -0.58564 | 1 | -8.07408 | 6.253666 | -0.77154 |
| 6 | 6.528531 | -2.4617  | -1.18209 | 1 | -10.3795 | 2.18292  | 1.480133 |
| 6 | 7.23399  | -1.29416 | -1.15549 | 6 | -6.43023 | 3.27509  | -0.68122 |

|   |          |          |          |   |          |          |          |
|---|----------|----------|----------|---|----------|----------|----------|
| 7 | 6.479649 | -0.29124 | -0.58025 | 1 | -5.96175 | 5.195595 | -1.48488 |
| 6 | 4.112989 | -2.9593  | -0.33081 | 1 | -5.50783 | 2.807485 | -1.00327 |
| 6 | 3.039445 | -2.36498 | 0.305367 | 6 | -1.285   | -1.69477 | -0.68741 |
| 6 | 3.071018 | -1.01115 | 0.696794 | 1 | 2.805288 | -4.75018 | 1.63647  |
| 6 | 4.174627 | -0.22346 | 0.434565 | 1 | -2.30798 | -4.54705 | 0.888887 |
| 1 | 2.219078 | -0.60241 | 1.226746 | 1 | 0.305007 | -5.73907 | 1.857366 |
| 1 | 4.207474 | 0.813378 | 0.745593 | 6 | 0.077078 | -1.73889 | -0.4646  |
| 1 | 8.223187 | -1.06734 | -1.52227 | 1 | 0.732383 | -0.9695  | -0.85374 |
| 1 | 4.05895  | -4.00015 | -0.62876 | 1 | -1.72041 | -0.88815 | -1.26489 |
| 1 | 6.869653 | -3.3996  | -1.58925 | 6 | -4.34568 | -1.54197 | -0.16774 |
| 6 | 0.582129 | -2.8264  | 0.253798 | 6 | -5.65796 | -1.87872 | -0.57513 |
| 6 | -0.25087 | -3.86757 | 0.727757 | 6 | -5.60068 | -3.20763 | -1.11021 |
| 6 | 0.601435 | -4.82417 | 1.370641 | 6 | -4.30178 | -3.61438 | -1.01224 |
| 6 | 1.875309 | -4.34572 | 1.267643 | 7 | -3.52891 | -2.6191  | -0.44933 |
| 7 | 1.881417 | -3.13787 | 0.600012 | 6 | -6.68694 | -0.94171 | -0.40597 |
| 6 | -1.63342 | -3.78736 | 0.510835 | 6 | -6.38978 | 0.270988 | 0.187449 |
| 6 | -2.13236 | -2.70675 | -0.19192 | 6 | -5.08289 | 0.577153 | 0.619506 |

<sup>6</sup>I<sub>C6N1'</sub>

|   |          |          |          |   |          |          |          |
|---|----------|----------|----------|---|----------|----------|----------|
| 6 | -7.81558 | 5.085932 | -0.42185 | 6 | 1.913879 | -3.67397 | 0.145885 |
| 6 | -8.96302 | 4.315502 | -0.72244 | 6 | 3.082233 | -4.35598 | 0.561314 |
| 6 | -9.89374 | 5.188604 | -1.37853 | 6 | 2.653088 | -5.50693 | 1.300178 |
| 6 | -9.3011  | 6.415415 | -1.44928 | 6 | 1.288547 | -5.4819  | 1.306724 |
| 7 | -8.05046 | 6.361653 | -0.87607 | 7 | 0.825686 | -4.37928 | 0.618202 |
| 6 | -8.98025 | 2.956968 | -0.37677 | 6 | 4.336245 | -3.83403 | 0.215065 |
| 6 | -7.88113 | 2.424127 | 0.269674 | 6 | 4.387017 | -2.68574 | -0.55266 |
| 1 | -7.41168 | 7.135077 | -0.80078 | 6 | 3.213358 | -2.03701 | -0.98757 |
| 6 | -6.75083 | 3.209744 | 0.575093 | 1 | 0.579964 | -6.15192 | 1.768759 |
| 6 | -6.70208 | 4.544012 | 0.224445 | 1 | 5.254124 | -4.30794 | 0.54376  |
| 1 | -5.92516 | 2.750884 | 1.105435 | 1 | 3.276364 | -6.24678 | 1.775538 |
| 1 | -5.83416 | 5.14852  | 0.459258 | 6 | 1.966935 | -2.51804 | -0.63832 |
| 1 | -9.67066 | 7.338452 | -1.86686 | 1 | 1.063038 | -2.02929 | -0.98018 |
| 1 | -9.82727 | 2.324737 | -0.61711 | 1 | 3.306161 | -1.16161 | -1.6191  |
| 1 | -10.8737 | 4.936214 | -1.74936 | 6 | 6.080571 | -0.85597 | -0.75262 |
| 6 | -6.93032 | 0.112764 | 0.34548  | 6 | 7.390148 | -0.75784 | -1.27919 |
| 6 | -7.33389 | -1.11678 | 0.918145 | 6 | 7.734856 | -2.05451 | -1.78477 |
| 6 | -8.5806  | -0.87832 | 1.584344 | 6 | 6.658622 | -2.86245 | -1.5585  |
| 6 | -8.87782 | 0.440408 | 1.399305 | 7 | 5.648868 | -2.15403 | -0.93967 |
| 7 | -7.88945 | 1.055078 | 0.657007 | 6 | 8.071765 | 0.463913 | -1.19122 |
| 6 | -6.51945 | -2.2456  | 0.75401  | 6 | 7.432881 | 1.540233 | -0.60415 |
| 6 | -5.36325 | -2.12454 | 0.00643  | 6 | 6.129208 | 1.424264 | -0.07958 |
| 6 | -4.99241 | -0.90072 | -0.58661 | 1 | 6.500219 | -3.90081 | -1.80593 |
| 6 | -5.76579 | 0.230905 | -0.41864 | 1 | 9.086719 | 0.570406 | -1.55676 |
| 1 | -4.09667 | -0.86738 | -1.19513 | 1 | 8.656204 | -2.34427 | -2.26334 |

|                       |          |          |          |   |          |          |          |
|-----------------------|----------|----------|----------|---|----------|----------|----------|
| 1                     | -5.49077 | 1.16959  | -0.8835  | 6 | 5.445332 | 0.225847 | -0.13587 |
| 1                     | -9.71254 | 1.024846 | 1.754489 | 1 | 5.666758 | 2.299157 | 0.361158 |
| 1                     | -6.77661 | -3.19668 | 1.206132 | 1 | 4.448805 | 0.131176 | 0.277393 |
| 1                     | -9.1704  | -1.58982 | 2.139031 | 6 | 8.272127 | 3.57125  | 0.594339 |
| 6                     | -3.18197 | -3.34475 | 0.065626 | 6 | 8.976344 | 4.736787 | 0.210475 |
| 6                     | -2.75594 | -4.65187 | -0.27034 | 6 | 9.220418 | 4.631253 | -1.19995 |
| 6                     | -3.91034 | -5.35877 | -0.74184 | 6 | 8.673996 | 3.449955 | -1.60713 |
| 6                     | -4.95739 | -4.48576 | -0.67798 | 7 | 8.09216  | 2.797859 | -0.53715 |
| 7                     | -4.53425 | -3.26364 | -0.19676 | 6 | 9.296027 | 5.69105  | 1.187842 |
| 6                     | -1.40646 | -4.99295 | -0.10434 | 6 | 8.922387 | 5.460343 | 2.498131 |
| 6                     | -0.54366 | -4.04715 | 0.416543 | 6 | 8.239581 | 4.283568 | 2.861199 |
| 6                     | -0.99076 | -2.7604  | 0.779258 | 1 | 8.620322 | 3.005268 | -2.58891 |
| 1                     | -5.99152 | -4.61368 | -0.95856 | 1 | 9.833282 | 6.592583 | 0.916184 |
| 1                     | -1.03433 | -5.97216 | -0.38326 | 1 | 9.163687 | 6.189125 | 3.262584 |
| 1                     | -3.95348 | -6.37633 | -1.09471 | 1 | 9.725407 | 5.346085 | -1.8295  |
| 6                     | -2.30989 | -2.39279 | 0.601398 | 6 | 7.907892 | 3.324352 | 1.921601 |
| 1                     | -2.66009 | -1.40929 | 0.889337 | 1 | 7.972815 | 4.12358  | 3.89905  |
| 1                     | -0.28299 | -2.06816 | 1.219268 | 1 | 7.395435 | 2.412384 | 2.202559 |
| <b>Isoindole (II)</b> |          |          |          |   |          |          |          |
| 6                     | -0.2516  | 0.720765 | -0.00012 | 1 | -2.02422 | 2.110268 | 0.000602 |
| 6                     | -0.25157 | -0.72064 | -7.4E-05 | 6 | 2.147119 | 0.716248 | -3.7E-05 |
| 6                     | -1.57871 | -1.12982 | -0.00016 | 6 | 0.984054 | 1.428395 | -7.5E-05 |
| 7                     | -2.34213 | -0.00006 | 0.000064 | 1 | 3.097436 | 1.236904 | -7.5E-05 |
| 6                     | -1.57882 | 1.129839 | 0.000151 | 1 | 0.994286 | 2.512376 | -0.00018 |
| 6                     | 0.984013 | -1.42838 | 0.000193 | 1 | -3.3496  | -6.9E-05 | -0.00046 |
| 6                     | 2.147108 | -0.71631 | 0.000096 | 1 | -2.02399 | -2.11035 | -2.8E-05 |
| 1                     | 3.097442 | -1.23694 | -0.00025 | 1 | 0.994013 | -2.51236 | 0.000048 |
| <b><sup>2</sup>II</b> |          |          |          |   |          |          |          |
| 6                     | 3.523806 | 0.598992 | 0.190813 | 6 | -2.70907 | -0.69559 | 0.290052 |
| 6                     | 2.947051 | -0.65435 | -0.22514 | 6 | -2.80318 | 0.614821 | -0.30183 |
| 6                     | 3.998756 | -1.51049 | -0.52137 | 6 | -1.5083  | 1.099795 | -0.42397 |
| 7                     | 5.150043 | -0.81545 | -0.29383 | 7 | -0.66122 | 0.140139 | 0.060864 |
| 6                     | 4.903446 | 0.453883 | 0.134425 | 6 | -1.36073 | -0.95194 | 0.49763  |
| 6                     | 1.5345   | -0.80456 | -0.28196 | 6 | -4.07845 | 1.149096 | -0.63905 |
| 6                     | 0.758156 | 0.254841 | 0.085743 | 6 | -5.19142 | 0.404174 | -0.37778 |
| 1                     | 5.703251 | 1.138302 | 0.361233 | 1 | -0.85081 | -1.78201 | 0.957146 |
| 6                     | 1.323584 | 1.501351 | 0.51233  | 6 | -5.09883 | -0.89222 | 0.223657 |
| 6                     | 2.673135 | 1.677828 | 0.56047  | 6 | -3.89334 | -1.43913 | 0.554716 |
| 1                     | 0.649652 | 2.291815 | 0.818845 | 1 | -6.01153 | -1.44398 | 0.415588 |
| 1                     | 3.09258  | 2.620909 | 0.890566 | 1 | -3.83335 | -2.42182 | 1.008533 |
| 1                     | 6.073496 | -1.19647 | -0.42667 | 1 | -1.12285 | 2.010584 | -0.85105 |
| 1                     | 4.014496 | -2.53014 | -0.86694 | 1 | -4.15859 | 2.130229 | -1.09313 |
| 1                     | 1.078456 | -1.72383 | -0.62962 | 1 | -6.17133 | 0.794533 | -0.62614 |

---

3//

|   |          |          |          |   |          |          |          |
|---|----------|----------|----------|---|----------|----------|----------|
| 6 | 6.345194 | -0.95954 | 0.02093  | 6 | -1.90914 | 1.821867 | -0.80293 |
| 6 | 5.917196 | 0.34802  | 0.449978 | 6 | -0.60812 | 2.185595 | -0.98336 |
| 6 | 7.044527 | 1.020001 | 0.901975 | 1 | -2.71554 | 2.487419 | -1.08532 |
| 7 | 8.098412 | 0.167886 | 0.751629 | 1 | -0.3617  | 3.156718 | -1.39643 |
| 6 | 7.716513 | -1.02912 | 0.226008 | 1 | 1.459499 | -1.68198 | 0.530436 |
| 6 | 4.544567 | 0.708753 | 0.371947 | 1 | -1.5772  | -1.32927 | 0.510507 |
| 6 | 3.667268 | -0.20431 | -0.1345  | 6 | -5.77425 | 0.413353 | 0.443939 |
| 1 | 8.426785 | -1.81724 | 0.04187  | 6 | -5.54184 | -0.90392 | -0.09178 |
| 6 | 4.084994 | -1.50269 | -0.57456 | 6 | -4.19357 | -0.97921 | -0.41423 |
| 6 | 5.391439 | -1.87958 | -0.49633 | 7 | -3.6257  | 0.22457  | -0.09763 |
| 1 | 3.33978  | -2.16775 | -0.99332 | 6 | -4.558   | 1.08234  | 0.419782 |
| 1 | 5.701774 | -2.86033 | -0.83691 | 6 | -6.62318 | -1.82174 | -0.20679 |
| 1 | 9.04767  | 0.39696  | 1.001164 | 6 | -7.86229 | -1.43159 | 0.211241 |
| 1 | 7.172423 | 2.00932  | 1.30721  | 1 | -4.2735  | 2.062544 | 0.764357 |
| 1 | 4.192878 | 1.670633 | 0.725692 | 6 | -8.09041 | -0.12727 | 0.756392 |
| 6 | 0.419549 | 1.266116 | -0.63746 | 6 | -7.07943 | 0.781668 | 0.874998 |
| 6 | 0.071178 | -0.03285 | -0.12115 | 1 | -9.09135 | 0.135345 | 1.078121 |
| 6 | 1.259633 | -0.71107 | 0.109038 | 1 | -3.60954 | -1.75538 | -0.87971 |
| 7 | 2.284365 | 0.12448  | -0.24495 | 1 | -6.45983 | -2.81191 | -0.61689 |
| 6 | 1.805094 | 1.321231 | -0.69859 | 1 | -8.69771 | -2.11746 | 0.133625 |
| 6 | -1.29276 | -0.37741 | 0.077955 | 1 | -7.26219 | 1.767379 | 1.287634 |
| 6 | -2.24564 | 0.537622 | -0.26417 | 1 | 2.477071 | 2.078831 | -1.06548 |

---

4//

|   |          |          |          |   |          |          |          |
|---|----------|----------|----------|---|----------|----------|----------|
| 6 | -9.27309 | 0.750036 | 0.486614 | 6 | 2.871044 | -0.08337 | -0.32794 |
| 6 | -8.74953 | -0.55255 | 0.812921 | 6 | 2.534977 | 1.24015  | -0.78691 |
| 6 | -9.79635 | -1.29342 | 1.344002 | 6 | 1.160471 | 1.266558 | -0.97984 |
| 7 | -10.8946 | -0.48556 | 1.336571 | 7 | 0.676173 | 0.030395 | -0.65702 |
| 6 | -10.6184 | 0.747797 | 0.829296 | 6 | 1.686514 | -0.80346 | -0.26153 |
| 6 | -7.37794 | -0.84602 | 0.583598 | 6 | 3.562784 | 2.205559 | -0.96665 |
| 6 | -6.59569 | 0.126554 | 0.034165 | 6 | 4.851012 | 1.860984 | -0.68415 |
| 1 | -11.3763 | 1.508803 | 0.751369 | 1 | 1.475979 | -1.80591 | 0.071545 |
| 6 | -7.10923 | 1.42093  | -0.30419 | 6 | 5.172452 | 0.550387 | -0.20349 |
| 6 | -8.41603 | 1.733283 | -0.08085 | 6 | 4.219106 | -0.40881 | -0.01972 |
| 1 | -6.43842 | 2.136038 | -0.76425 | 1 | 0.504046 | 2.03211  | -1.35814 |
| 1 | -8.80006 | 2.711451 | -0.34514 | 1 | 3.327996 | 3.197397 | -1.33492 |
| 1 | -11.8035 | -0.76796 | 1.668435 | 1 | 5.660427 | 2.563619 | -0.83966 |
| 1 | -9.8409  | -2.30282 | 1.716078 | 1 | 4.489442 | -1.38193 | 0.372804 |
| 1 | -6.95219 | -1.80406 | 0.857421 | 6 | 8.616265 | 0.456754 | 0.845792 |
| 6 | -3.35587 | -1.16938 | -0.85431 | 6 | 8.479327 | -0.82123 | 0.194253 |
| 6 | -3.01214 | 0.119983 | -0.31097 | 6 | 7.17248  | -0.90366 | -0.26745 |
| 6 | -4.19899 | 0.73172  | 0.067138 | 7 | 6.538939 | 0.258625 | 0.077414 |
| 7 | -5.21764 | -0.1333  | -0.22633 | 6 | 7.387927 | 1.0965   | 0.747687 |

|   |          |          |          |   |          |          |          |
|---|----------|----------|----------|---|----------|----------|----------|
| 6 | -4.73723 | -1.28502 | -0.78296 | 6 | 9.594906 | -1.70163 | 0.122578 |
| 6 | -1.65088 | 0.517207 | -0.22862 | 6 | 10.7737  | -1.31522 | 0.691551 |
| 6 | -0.70092 | -0.33827 | -0.7061  | 1 | 7.03999  | 2.040777 | 1.132092 |
| 1 | -5.41067 | -2.05555 | -1.11889 | 6 | 10.90563 | -0.05133 | 1.351417 |
| 6 | -1.03427 | -1.6112  | -1.27143 | 6 | 9.859923 | 0.821805 | 1.43298  |
| 6 | -2.33109 | -2.02486 | -1.34265 | 1 | 11.86078 | 0.209465 | 1.79194  |
| 1 | -0.23309 | -2.22636 | -1.66219 | 1 | 6.661277 | -1.65606 | -0.84431 |
| 1 | -2.57733 | -2.98686 | -1.7765  | 1 | 9.504263 | -2.66121 | -0.37376 |
| 1 | -4.39638 | 1.672601 | 0.552933 | 1 | 11.63371 | -1.9732  | 0.648904 |
| 1 | -1.36412 | 1.460612 | 0.220751 | 1 | 9.96987  | 1.777191 | 1.933463 |

5//

|   |          |          |          |   |          |          |          |
|---|----------|----------|----------|---|----------|----------|----------|
| 6 | 6.333116 | 1.311812 | -0.43556 | 6 | -11.4609 | -0.54153 | -1.10972 |
| 6 | 5.895807 | 0.020426 | 0.030107 | 6 | -11.3085 | -1.20336 | 0.161138 |
| 6 | 7.014029 | -0.80098 | 0.061272 | 6 | -10.0332 | -0.90638 | 0.623171 |
| 7 | 8.082351 | -0.05455 | -0.35479 | 7 | -9.43283 | -0.10503 | -0.30884 |
| 6 | 7.699635 | 1.220808 | -0.66099 | 6 | -10.273  | 0.131301 | -1.36245 |
| 6 | 4.527647 | -0.19687 | 0.343136 | 6 | -12.3842 | -1.96758 | 0.693696 |
| 6 | 3.660648 | 0.846651 | 0.196133 | 6 | -13.5391 | -2.06646 | -0.02677 |
| 1 | 8.410949 | 1.929634 | -1.0504  | 1 | -9.94449 | 0.70985  | -2.20969 |
| 6 | 4.084508 | 2.1332   | -0.26822 | 6 | -13.6856 | -1.41952 | -1.29567 |
| 6 | 5.390046 | 2.364677 | -0.58464 | 6 | -12.6783 | -0.6728  | -1.83446 |
| 1 | 3.347952 | 2.924213 | -0.33762 | 1 | -14.6207 | -1.52995 | -1.83222 |
| 1 | 5.706633 | 3.34257  | -0.92782 | 1 | -9.52757 | -1.15233 | 1.541863 |
| 1 | 7.144162 | -1.8214  | 0.380643 | 1 | -12.2823 | -2.46229 | 1.652992 |
| 1 | 4.169362 | -1.16744 | 0.66536  | 1 | -14.3684 | -2.64586 | 0.361791 |
| 6 | 0.430121 | 0.047292 | 1.572969 | 1 | -12.799  | -0.18529 | -2.79526 |
| 6 | 0.065099 | 0.750816 | 0.369815 | 6 | 11.77067 | -0.28737 | -0.08724 |
| 6 | 1.245844 | 1.122649 | -0.25795 | 6 | 11.99172 | -1.58944 | -0.66431 |
| 7 | 2.280642 | 0.673237 | 0.515477 | 6 | 13.35962 | -1.82433 | -0.63195 |
| 6 | 1.817265 | 0.023345 | 1.624098 | 7 | 13.93518 | -0.72777 | -0.06549 |
| 6 | -1.30405 | 0.917387 | 0.031192 | 6 | 13.01228 | 0.215848 | 0.275942 |
| 6 | -2.24394 | 0.424658 | 0.8894   | 6 | 10.8854  | -2.35114 | -1.13247 |
| 1 | 2.501123 | -0.35317 | 2.366149 | 6 | 9.631419 | -1.83053 | -1.02355 |
| 6 | -1.89182 | -0.25464 | 2.099681 | 1 | 13.29963 | 1.144883 | 0.738144 |
| 6 | -0.5848  | -0.44586 | 2.437026 | 6 | 9.421331 | -0.53978 | -0.43781 |
| 1 | -2.68854 | -0.59144 | 2.751501 | 6 | 10.44993 | 0.224592 | 0.028336 |
| 1 | -0.32434 | -0.95581 | 3.357072 | 1 | 10.25498 | 1.183255 | 0.494245 |
| 1 | 1.43272  | 1.620355 | -1.19471 | 1 | 14.92671 | -0.62552 | 0.084323 |
| 1 | -1.60288 | 1.400601 | -0.89156 | 1 | 13.94771 | -2.66421 | -0.96097 |
| 6 | -5.78938 | 0.135018 | 0.32754  | 1 | 11.03891 | -3.3247  | -1.58272 |
| 6 | -5.54806 | 1.503091 | -0.05396 | 1 | 8.771573 | -2.37111 | -1.3997  |
| 6 | -4.19277 | 1.742635 | 0.128221 | 6 | -7.09629 | -0.41228 | 0.224786 |
| 7 | -3.63021 | 0.588171 | 0.5942   | 1 | -3.60026 | 2.634674 | 0.013035 |

|   |          |          |          |   |          |          |          |
|---|----------|----------|----------|---|----------|----------|----------|
| 6 | -4.57053 | -0.3971  | 0.724579 | 1 | -6.46732 | 3.350461 | -0.76198 |
| 6 | -6.62975 | 2.312593 | -0.4956  | 1 | -8.7282  | 2.368148 | -0.86699 |
| 6 | -7.87811 | 1.769292 | -0.56412 | 1 | -7.2932  | -1.45175 | 0.45909  |
| 1 | -4.29056 | -1.38834 | 1.039579 | 6 | -8.1039  | 0.400411 | -0.20783 |

6//

|   |          |          |          |   |          |          |          |
|---|----------|----------|----------|---|----------|----------|----------|
| 6 | -9.19399 | -0.51595 | -1.25223 | 6 | 2.869894 | -1.16016 | 0.456114 |
| 6 | -8.73543 | 0.126281 | -0.04673 | 6 | 2.597687 | -1.93199 | -0.72974 |
| 6 | -9.81228 | 0.829477 | 0.474623 | 6 | 1.222826 | -2.1165  | -0.78692 |
| 7 | -10.8771 | 0.625829 | -0.35959 | 7 | 0.678852 | -1.49287 | 0.299741 |
| 6 | -10.5317 | -0.17991 | -1.40757 | 6 | 1.649005 | -0.90875 | 1.066697 |
| 6 | -7.38824 | -0.03057 | 0.374443 | 6 | 3.672153 | -2.35282 | -1.55923 |
| 6 | -6.56217 | -0.80408 | -0.38803 | 6 | 4.945678 | -2.00181 | -1.22203 |
| 1 | -11.2416 | -0.40406 | -2.18594 | 1 | 1.39022  | -0.33616 | 1.941534 |
| 6 | -7.00718 | -1.44529 | -1.58853 | 6 | 5.203138 | -1.2133  | -0.05499 |
| 6 | -8.29262 | -1.30284 | -2.01929 | 6 | 4.203891 | -0.79002 | 0.772724 |
| 1 | -6.30537 | -2.06611 | -2.13176 | 1 | 0.601188 | -2.66838 | -1.47179 |
| 1 | -8.626   | -1.79671 | -2.9244  | 1 | 3.483885 | -2.95445 | -2.44071 |
| 1 | -9.91936 | 1.410795 | 1.375046 | 1 | 5.788615 | -2.33227 | -1.81645 |
| 1 | -7.01169 | 0.467948 | 1.259842 | 1 | 4.428912 | -0.16947 | 1.632118 |
| 6 | -3.41651 | -1.36585 | 1.273882 | 6 | 8.656513 | -0.19192 | -0.02274 |
| 6 | -2.99103 | -1.15381 | -0.08631 | 6 | 8.439529 | -0.51712 | 1.36388  |
| 6 | -4.13465 | -0.92846 | -0.83978 | 6 | 7.121971 | -0.93909 | 1.480732 |
| 7 | -5.20493 | -0.99785 | 0.008845 | 7 | 6.558409 | -0.87629 | 0.237927 |
| 6 | -4.80081 | -1.26093 | 1.28686  | 6 | 7.461649 | -0.4299  | -0.68763 |
| 6 | -1.60887 | -1.17957 | -0.41101 | 6 | 9.506048 | -0.38355 | 2.293919 |
| 6 | -0.7179  | -1.44133 | 0.589127 | 6 | 10.71514 | 0.067194 | 1.854318 |
| 1 | -5.52287 | -1.39517 | 2.074679 | 1 | 7.170769 | -0.27912 | -1.7137  |
| 6 | -1.13173 | -1.67782 | 1.939168 | 6 | 10.91405 | 0.412947 | 0.47864  |
| 6 | -2.4511  | -1.63785 | 2.280648 | 6 | 9.920166 | 0.296924 | -0.44958 |
| 1 | -0.37416 | -1.91278 | 2.676712 | 1 | 6.561348 | -1.3167  | 2.319291 |
| 1 | -2.75918 | -1.82307 | 3.302964 | 1 | 9.364443 | -0.64799 | 3.335335 |
| 1 | -4.27021 | -0.68524 | -1.88027 | 1 | 11.55612 | 0.150724 | 2.53169  |
| 1 | -1.26103 | -0.97566 | -1.41685 | 1 | 10.09287 | 0.593986 | -1.47724 |
| 6 | 14.06528 | 1.183917 | -1.08749 | 6 | -14.5596 | 0.965988 | -0.12621 |
| 6 | 14.11429 | 2.017736 | 0.086724 | 6 | -14.6684 | 2.346553 | 0.273084 |
| 6 | 12.93778 | 1.797933 | 0.790447 | 6 | -16.0213 | 2.628995 | 0.404453 |
| 7 | 12.20168 | 0.883409 | 0.087917 | 7 | -16.6946 | 1.484031 | 0.103959 |
| 6 | 12.85912 | 0.497199 | -1.04773 | 6 | -15.8502 | 0.463279 | -0.2183  |
| 6 | 15.24271 | 2.854159 | 0.313916 | 6 | -13.4912 | 3.12555  | 0.448437 |
| 6 | 16.2662  | 2.835211 | -0.58877 | 6 | -12.2774 | 2.545785 | 0.234664 |
| 1 | 12.44088 | -0.25665 | -1.69347 | 1 | -16.2198 | -0.51353 | -0.4801  |
| 6 | 16.22391 | 1.996075 | -1.74819 | 6 | -12.1797 | 1.169326 | -0.15133 |
| 6 | 15.15555 | 1.185482 | -2.00172 | 6 | -13.2794 | 0.382341 | -0.32722 |



|                       |           |           |           |   |           |           |           |
|-----------------------|-----------|-----------|-----------|---|-----------|-----------|-----------|
| 1                     | 17.06272  | 2.012039  | -2.43415  | 1 | -13.1708  | -0.66348  | -0.58911  |
| 1                     | 12.54912  | 2.242048  | 1.691662  | 1 | -17.699   | 1.40058   | 0.118352  |
| 1                     | 15.28438  | 3.491576  | 1.18988   | 1 | -16.5385  | 3.532302  | 0.680153  |
| 1                     | 17.1344   | 3.464561  | -0.43209  | 1 | -13.5593  | 4.168827  | 0.733145  |
| 1                     | 15.13218  | 0.554582  | -2.88308  | 1 | -11.364   | 3.120232  | 0.327918  |
| <b>Azulene (Az)</b>   |           |           |           |   |           |           |           |
| 6                     | 0.000000  | 0.000000  | -2.491976 | 1 | 0.000000  | 2.101480  | -2.591336 |
| 6                     | 0.000000  | 1.262799  | -1.903399 | 1 | 0.000000  | 2.653356  | -0.318494 |
| 6                     | 0.000000  | 1.590576  | -0.549931 | 1 | 0.000000  | -2.101480 | -2.591336 |
| 6                     | 0.000000  | -1.262799 | -1.903399 | 1 | 0.000000  | -2.653356 | -0.318494 |
| 6                     | 0.000000  | 0.746254  | 0.551515  | 6 | 0.000000  | 1.147020  | 1.894282  |
| 6                     | 0.000000  | -1.590576 | -0.549931 | 1 | 0.000000  | 2.171667  | 2.237453  |
| 6                     | 0.000000  | -0.746254 | 0.551515  | 6 | 0.000000  | 0.000000  | 2.697615  |
| 1                     | 0.000000  | 0.000000  | -3.578188 | 1 | 0.000000  | 0.000000  | 3.779496  |
| 1                     | 0.000000  | -2.171667 | 2.237453  | 6 | 0.000000  | -1.147020 | 1.894282  |
| <b><sup>2</sup>Az</b> |           |           |           |   |           |           |           |
| 6                     | -0.831208 | -0.000038 | -0.000052 | 6 | -6.061109 | 0.000029  | 0.000060  |
| 6                     | -1.454674 | 1.199567  | -0.377488 | 1 | -7.142977 | 0.000046  | 0.000087  |
| 6                     | -2.806225 | 1.507063  | -0.472231 | 6 | -5.256991 | -1.095023 | 0.342826  |
| 6                     | -1.454687 | -1.199624 | 0.377399  | 1 | -5.598990 | -2.073286 | 0.649056  |
| 6                     | -3.915376 | 0.709667  | -0.221231 | 6 | 5.845833  | 0.000035  | 0.000061  |
| 6                     | -2.806245 | -1.507088 | 0.472191  | 6 | 5.257013  | 1.202353  | 0.387333  |
| 6                     | -3.915384 | -0.709661 | 0.221251  | 6 | 3.904900  | 1.517665  | 0.479534  |
| 1                     | -0.778692 | 1.999012  | -0.660115 | 6 | 5.257053  | -1.202309 | -0.387240 |
| 1                     | -3.032314 | 2.520139  | -0.797681 | 6 | 2.802719  | 0.713214  | 0.214612  |
| 1                     | -0.778717 | -1.999084 | 0.660012  | 6 | 3.904966  | -1.517653 | -0.479506 |
| 1                     | -3.032347 | -2.520164 | 0.797631  | 6 | 2.802742  | -0.713225 | -0.214631 |
| 6                     | -5.256976 | 1.095063  | -0.342742 | 1 | 6.931944  | 0.000046  | 0.000082  |
| 1                     | -5.598968 | 2.073335  | -0.648954 | 1 | 5.945491  | 1.999648  | 0.646003  |
| 6                     | 1.464170  | 1.100432  | 0.321627  | 1 | 3.672692  | 2.531330  | 0.797662  |
| 1                     | 1.123514  | 2.073152  | 0.647520  | 1 | 5.945568  | -1.999581 | -0.645881 |
| 6                     | 0.646494  | -0.000028 | -0.000038 | 1 | 3.672792  | -2.531319 | -0.797653 |
| 6                     | 1.464217  | -1.100459 | -0.321746 | 1 | 1.123599  | -2.073172 | -0.647697 |
| <b><sup>3</sup>Az</b> |           |           |           |   |           |           |           |
| 6                     | -4.190631 | 0.000033  | -0.000050 | 6 | -1.894977 | 1.061596  | 0.434439  |
| 6                     | -4.815356 | 1.235260  | -0.235021 | 1 | -2.234453 | 1.995367  | 0.860221  |
| 6                     | -6.166759 | 1.551381  | -0.292619 | 6 | -2.713853 | 0.000164  | -0.000097 |
| 6                     | -4.815163 | -1.235266 | 0.234983  | 6 | -1.894859 | -1.061278 | -0.434762 |
| 6                     | -7.276253 | 0.730282  | -0.136427 | 1 | -2.234365 | -1.995051 | -0.860507 |
| 6                     | -6.166524 | -1.551555 | 0.292792  | 6 | 9.202525  | -0.000372 | 0.000347  |
| 6                     | -7.276138 | -0.730591 | 0.136807  | 6 | 8.613897  | 1.239572  | -0.242017 |
| 1                     | -4.140010 | 2.062566  | -0.422898 | 6 | 7.262094  | 1.563739  | -0.296017 |
| 1                     | -6.392936 | 2.595536  | -0.497583 | 6 | 8.613705  | -1.240081 | 0.242617  |

|   |            |           |           |   |           |           |           |
|---|------------|-----------|-----------|---|-----------|-----------|-----------|
| 1 | -4.139695  | -2.062487 | 0.422785  | 6 | 6.159795  | 0.733423  | -0.128029 |
| 1 | -6.392537  | -2.595744 | 0.497760  | 6 | 7.261702  | -1.564023 | 0.296431  |
| 6 | -8.617903  | 1.127394  | -0.211827 | 6 | 6.159655  | -0.733579 | 0.128427  |
| 1 | -8.959907  | 2.134876  | -0.401061 | 1 | 10.288615 | -0.000416 | 0.000389  |
| 6 | -9.422090  | -0.000292 | 0.000373  | 1 | 9.302561  | 2.061652  | -0.404698 |
| 1 | -10.503965 | -0.000351 | 0.000468  | 1 | 7.029958  | 2.607901  | -0.492044 |
| 6 | -8.617736  | -1.127870 | 0.212436  | 1 | 9.302097  | -2.062374 | 0.405364  |
| 1 | -8.959573  | -2.135398 | 0.401730  | 1 | 7.029454  | -2.608186 | 0.492341  |
| 6 | 2.527158   | 0.000290  | -0.000207 | 6 | 4.821521  | 1.131187  | -0.187917 |
| 6 | 1.902297   | 1.150169  | 0.509081  | 1 | 4.481756  | 2.135884  | -0.396628 |
| 6 | 0.552405   | 1.448886  | 0.630040  | 6 | 4.003737  | 0.000002  | 0.000077  |
| 6 | 1.902354   | -1.149451 | -0.510184 | 6 | 4.821220  | -1.131234 | 0.188099  |
| 6 | -0.558046  | 0.684987  | 0.285523  | 1 | 4.481246  | -2.135917 | 0.396529  |
| 6 | 0.552513   | -1.448180 | -0.631118 | 1 | 0.326123  | 2.421883  | 1.060261  |
| 6 | -0.558032  | -0.684516 | -0.286094 | 1 | 2.577983  | -1.911666 | -0.882306 |
| 1 | 2.577916   | 1.912510  | 0.880970  | 1 | 0.326181  | -2.421054 | -1.061611 |

<sup>4</sup>Az

|   |           |           |           |   |            |           |           |
|---|-----------|-----------|-----------|---|------------|-----------|-----------|
| 6 | 0.831067  | 0.000069  | -0.000022 | 6 | -12.560745 | -0.000296 | -0.000173 |
| 6 | 1.457598  | 1.202274  | 0.369161  | 6 | -11.972287 | 1.202541  | 0.386438  |
| 6 | 2.807181  | 1.513329  | 0.451838  | 6 | -10.620475 | 1.517988  | 0.478459  |
| 6 | 1.457520  | -1.202167 | -0.369420 | 6 | -11.972066 | -1.202993 | -0.386696 |
| 6 | 3.918128  | 0.713857  | 0.200499  | 6 | -9.518204  | 0.713004  | 0.213867  |
| 6 | 2.807043  | -1.513273 | -0.452190 | 6 | -10.620148 | -1.518232 | -0.478583 |
| 6 | 3.918059  | -0.713860 | -0.200843 | 6 | -9.518044  | -0.713093 | -0.213899 |
| 1 | 0.782511  | 2.003240  | 0.649120  | 1 | -13.646820 | -0.000393 | -0.000233 |
| 1 | 3.033803  | 2.530837  | 0.762257  | 1 | -12.660984 | 1.999763  | 0.644494  |
| 1 | 0.782379  | -2.003058 | -0.649447 | 1 | -10.388258 | 2.531819  | 0.795888  |
| 1 | 3.033624  | -2.530772 | -0.762661 | 1 | -12.660599 | -2.000333 | -0.644823 |
| 6 | 5.255075  | 1.106270  | 0.302233  | 1 | -10.387759 | -2.532031 | -0.795998 |
| 1 | 5.594220  | 2.084762  | 0.612103  | 6 | -8.179940  | 1.101258  | 0.320238  |
| 6 | 6.074126  | -0.000074 | -0.000150 | 1 | -7.840564  | 2.074365  | 0.646241  |
| 6 | 5.254968  | -1.106383 | -0.302514 | 6 | -7.362094  | 0.000108  | 0.000143  |
| 1 | 5.594089  | -2.084881 | -0.612399 | 6 | -8.179702  | -1.101107 | -0.320231 |
| 6 | -5.885672 | 0.000172  | 0.000245  | 1 | -7.840167  | -2.074152 | -0.646243 |
| 6 | -5.260551 | 1.204077  | -0.364326 | 6 | 7.550749   | -0.000110 | -0.000128 |
| 6 | -3.910964 | 1.515568  | -0.446692 | 6 | 8.175951   | 1.198025  | -0.381621 |
| 6 | -5.260537 | -1.203790 | 0.364882  | 6 | 9.527213   | 1.505002  | -0.476242 |
| 6 | -2.800417 | 0.714631  | -0.198349 | 6 | 8.175926   | -1.198142 | 0.381408  |
| 6 | -3.911014 | -1.515264 | 0.447196  | 6 | 10.637065  | 0.708663  | -0.222716 |
| 6 | -2.800438 | -0.714352 | 0.198644  | 6 | 9.527267   | -1.505105 | 0.476182  |
| 1 | -5.936309 | 2.005933  | -0.640244 | 6 | 10.637072  | -0.708761 | 0.222839  |
| 1 | -3.684295 | 2.534132  | -0.753415 | 1 | 7.500504   | 1.996527  | -0.667871 |
| 1 | -5.936327 | -2.005615 | 0.640804  | 1 | 9.753333   | 2.517189  | -0.804546 |

|   |           |           |           |   |           |           |           |
|---|-----------|-----------|-----------|---|-----------|-----------|-----------|
| 1 | -3.684304 | -2.533807 | 0.753957  | 1 | 7.500507  | -1.996679 | 0.667629  |
| 6 | -1.463724 | 1.107563  | -0.298999 | 1 | 9.753347  | -2.517297 | 0.804504  |
| 1 | -1.125620 | 2.087028  | -0.606771 | 6 | 11.978699 | 1.094168  | -0.345060 |
| 6 | -0.644470 | 0.000121  | -0.000002 | 1 | 12.320503 | 2.071823  | -0.653583 |
| 6 | -1.463781 | -1.107363 | 0.298957  | 6 | 12.783036 | -0.000048 | 0.000238  |
| 1 | -1.125592 | -2.086824 | 0.606654  | 6 | 11.978764 | -1.094230 | 0.345432  |
| 1 | 13.864937 | 0.000039  | 0.000301  | 1 | 12.320453 | -2.071903 | 0.654018  |

<sup>5</sup>Az

|   |           |           |           |   |            |           |           |
|---|-----------|-----------|-----------|---|------------|-----------|-----------|
| 6 | 4.190498  | -0.000136 | 0.000105  | 6 | 10.910396  | 0.000148  | -0.000146 |
| 6 | 4.817193  | -1.245090 | -0.178500 | 6 | 11.535705  | -1.128787 | 0.553400  |
| 6 | 6.166672  | -1.564138 | -0.218595 | 6 | 12.886971  | -1.418626 | 0.691753  |
| 6 | 4.817058  | 1.244778  | 0.178682  | 6 | 11.535664  | 1.129051  | -0.553716 |
| 6 | 7.277798  | -0.735507 | -0.093897 | 6 | 13.996830  | -0.668218 | 0.324036  |
| 6 | 6.166618  | 1.563902  | 0.218632  | 6 | 12.886943  | 1.418987  | -0.692036 |
| 6 | 7.277675  | 0.735366  | 0.093855  | 6 | 13.996830  | 0.668682  | -0.324260 |
| 1 | 4.141786  | -2.088356 | -0.270216 | 1 | 10.860319  | -1.876531 | 0.954050  |
| 1 | 6.393209  | -2.619023 | -0.356235 | 1 | 13.113048  | -2.371695 | 1.165052  |
| 1 | 4.141649  | 2.088030  | 0.270496  | 1 | 10.860255  | 1.876741  | -0.954433 |
| 1 | 6.393090  | 2.618802  | 0.356247  | 1 | 13.112957  | 2.372060  | -1.165361 |
| 6 | 8.614701  | -1.138918 | -0.134691 | 6 | 15.338469  | -1.031594 | 0.501677  |
| 1 | 8.953931  | -2.152596 | -0.295542 | 1 | 15.680190  | -1.953598 | 0.949997  |
| 6 | 9.433755  | 0.000114  | -0.000107 | 6 | 16.142854  | 0.000301  | -0.000057 |
| 6 | 8.614651  | 1.138948  | 0.134615  | 6 | 15.338476  | 1.032134  | -0.501838 |
| 1 | 8.953752  | 2.152670  | 0.295471  | 1 | 15.680099  | 1.954172  | -0.950156 |
| 6 | -2.527725 | -0.000293 | 0.000168  | 1 | 17.224757  | 0.000288  | -0.000015 |
| 6 | -1.901188 | 0.929397  | 0.847406  | 6 | -15.918816 | 0.000392  | -0.000131 |
| 6 | -0.551967 | 1.175532  | 1.054804  | 6 | -15.330332 | -1.134922 | 0.554040  |
| 6 | -1.901201 | -0.929974 | -0.846946 | 6 | -13.978452 | -1.433777 | 0.690466  |
| 6 | 0.559228  | 0.559526  | 0.486113  | 6 | -15.330114 | 1.135746  | -0.554362 |
| 6 | -0.551880 | -1.176065 | -1.054281 | 6 | -12.876272 | -0.674873 | 0.313662  |
| 6 | 0.559180  | -0.559937 | -0.485687 | 6 | -13.978332 | 1.434390  | -0.690771 |
| 1 | -2.576341 | 1.534079  | 1.442531  | 6 | -12.876159 | 0.675260  | -0.313945 |
| 1 | -0.325336 | 1.963260  | 1.769745  | 1 | -17.004887 | 0.000486  | -0.000142 |
| 1 | -2.576285 | -1.534740 | -1.442061 | 1 | -16.018935 | -1.887281 | 0.923144  |
| 1 | -0.325207 | -1.963868 | -1.769126 | 1 | -13.746356 | -2.391792 | 1.149692  |
| 6 | 1.895861  | 0.871622  | 0.745669  | 1 | -16.018666 | 1.888163  | -0.923443 |
| 1 | 2.233895  | 1.624143  | 1.444156  | 1 | -13.746039 | 2.392359  | -1.149987 |
| 6 | 2.715155  | -0.000217 | 0.000130  | 6 | -11.537966 | -1.043928 | 0.474606  |
| 6 | 1.895916  | -0.872009 | -0.745327 | 1 | -11.198800 | -1.960483 | 0.936461  |
| 1 | 2.233910  | -1.624533 | -1.443832 | 6 | -10.720318 | -0.000014 | -0.000051 |
| 6 | -9.243956 | -0.000053 | -0.000029 | 6 | -11.537910 | 1.044083  | -0.474853 |
| 6 | -8.618923 | -1.243642 | -0.189876 | 1 | -11.198483 | 1.960542  | -0.936709 |
| 6 | -7.269418 | -1.560972 | -0.244590 | 1 | -9.294740  | 2.076934  | 0.345844  |

|   |           |           |           |   |           |           |           |
|---|-----------|-----------|-----------|---|-----------|-----------|-----------|
| 6 | -8.618845 | 1.243524  | 0.189897  | 1 | -7.042717 | 2.610085  | 0.419003  |
| 6 | -6.158827 | -0.731195 | -0.123691 | 6 | -4.822179 | -1.129436 | -0.202172 |
| 6 | -7.269340 | 1.560729  | 0.244668  | 1 | -4.484097 | -2.146624 | -0.341541 |
| 6 | -6.158804 | 0.730851  | 0.123777  | 6 | -4.003064 | -0.000250 | 0.000118  |
| 1 | -9.294880 | -2.077008 | -0.345815 | 6 | -4.822144 | 1.129020  | 0.202271  |
| 1 | -7.042898 | -2.610356 | -0.418895 | 1 | -4.483973 | 2.146179  | 0.341640  |

<sup>6</sup>Az

|   |            |           |           |   |            |           |           |
|---|------------|-----------|-----------|---|------------|-----------|-----------|
| 6 | -7.550123  | 0.000302  | 0.000247  | 6 | -14.270569 | -0.000175 | 0.000037  |
| 6 | -8.177273  | 1.203687  | -0.364813 | 6 | -14.896079 | 1.196284  | 0.386296  |
| 6 | -9.526736  | 1.514892  | -0.445912 | 6 | -16.247384 | 1.502687  | 0.481976  |
| 6 | -8.177127  | -1.203151 | 0.365356  | 6 | -14.895825 | -1.196746 | -0.386286 |
| 6 | -10.637971 | 0.714565  | -0.197540 | 6 | -17.357235 | 0.707264  | 0.225390  |
| 6 | -9.526552  | -1.514507 | 0.446402  | 6 | -16.247058 | -1.503437 | -0.482059 |
| 6 | -10.637869 | -0.714322 | 0.197937  | 6 | -17.357098 | -0.708264 | -0.225501 |
| 1 | -7.502341  | 2.005632  | -0.642272 | 1 | -14.220727 | 1.993710  | 0.675782  |
| 1 | -9.753423  | 2.533582  | -0.752512 | 1 | -16.473625 | 2.513576  | 0.814261  |
| 1 | -7.502107  | -2.005004 | 0.642862  | 1 | -14.220289 | -1.994029 | -0.675740 |
| 1 | -9.753141  | -2.533215 | 0.753019  | 1 | -16.473059 | -2.514365 | -0.814391 |
| 6 | -11.974982 | 1.107537  | -0.297746 | 6 | -18.698987 | 1.092195  | 0.349408  |
| 1 | -12.314101 | 2.087226  | -0.603845 | 1 | -19.040754 | 2.068650  | 0.661736  |
| 6 | -12.794026 | -0.000048 | 0.000110  | 6 | -19.503213 | -0.000708 | -0.000088 |
| 6 | -11.974827 | -1.107503 | 0.298046  | 6 | -18.698765 | -1.093453 | -0.349567 |
| 1 | -12.313830 | -2.087237 | 0.604131  | 1 | -19.040310 | -2.069979 | -0.661915 |
| 6 | -0.831195  | 0.000379  | -0.000089 | 1 | -20.585109 | -0.000803 | -0.000103 |
| 6 | -1.458152  | 1.204186  | 0.364383  | 6 | 12.603001  | -0.000044 | -0.000176 |
| 6 | -2.807372  | 1.515226  | 0.446069  | 6 | 11.977899  | 1.204713  | 0.361995  |
| 6 | -1.458196  | -1.203493 | -0.364525 | 6 | 10.628456  | 1.516325  | 0.443483  |
| 6 | -3.918701  | 0.714419  | 0.198060  | 6 | 11.977806  | -1.204777 | -0.362482 |
| 6 | -2.807363  | -1.514534 | -0.446049 | 6 | 9.517845   | 0.714752  | 0.196590  |
| 6 | -3.918718  | -0.713704 | -0.197922 | 6 | 10.628404  | -1.516302 | -0.444098 |
| 1 | -0.783004  | 2.006183  | 0.641107  | 6 | 9.517769   | -0.714675 | -0.197178 |
| 1 | -3.034113  | 2.533891  | 0.752641  | 1 | 12.653694  | 2.007040  | 0.636396  |
| 1 | -0.783044  | -2.005461 | -0.641312 | 1 | 10.401714  | 2.535506  | 0.748115  |
| 1 | -3.034158  | -2.533198 | -0.752584 | 1 | 12.653593  | -2.007124 | -0.636849 |
| 6 | -5.255403  | 1.107933  | 0.298522  | 1 | 10.401613  | -2.535444 | -0.748828 |
| 1 | -5.593069  | 2.087581  | 0.606196  | 6 | 8.181195   | 1.108399  | 0.296058  |
| 6 | -6.074885  | 0.000372  | 0.000200  | 1 | 7.843428   | 2.088553  | 0.601937  |
| 6 | -5.255369  | -1.107226 | -0.298239 | 6 | 7.362022   | 0.000157  | -0.000289 |
| 1 | -5.593107  | -2.086858 | -0.605885 | 6 | 8.181149   | -1.108198 | -0.296650 |
| 6 | 5.886871   | 0.000188  | -0.000284 | 1 | 7.843287   | -2.088317 | -0.602532 |
| 6 | 5.260167   | 1.202577  | -0.369744 | 6 | 19.277735  | -0.000559 | 0.000593  |
| 6 | 3.911000   | 1.513564  | -0.452078 | 6 | 18.689353  | 1.201552  | -0.388338 |
| 6 | 5.260114   | -1.202176 | 0.369192  | 6 | 17.337580  | 1.516801  | -0.481044 |

|                       |           |           |           |   |           |           |           |
|-----------------------|-----------|-----------|-----------|---|-----------|-----------|-----------|
| 6                     | 2.799754  | 0.713734  | -0.200489 | 6 | 18.689079 | -1.202577 | 0.389352  |
| 6                     | 3.910933  | -1.513054 | 0.451592  | 6 | 16.235270 | 0.712294  | -0.214940 |
| 6                     | 2.799737  | -0.713124 | 0.200092  | 6 | 17.337215 | -1.517597 | 0.481692  |
| 1                     | 5.935301  | 2.003340  | -0.650004 | 6 | 16.235129 | -0.712890 | 0.215348  |
| 1                     | 3.684275  | 2.531051  | -0.762478 | 1 | 20.363813 | -0.000629 | 0.000742  |
| 1                     | 5.935206  | -2.002986 | 0.649411  | 1 | 19.378081 | 1.998261  | -0.647874 |
| 1                     | 3.684135  | -2.530528 | 0.761981  | 1 | 17.105401 | 2.530030  | -0.800447 |
| 6                     | 1.463138  | 1.107182  | -0.301714 | 1 | 19.377608 | -1.999403 | 0.649056  |
| 1                     | 1.125404  | 2.085851  | -0.612406 | 1 | 17.104775 | -2.530798 | 0.800996  |
| 6                     | 0.643812  | 0.000356  | -0.000141 | 6 | 14.897027 | 1.100497  | -0.322081 |
| 6                     | 1.463108  | -1.106510 | 0.301395  | 1 | 14.557745 | 2.073002  | -0.649916 |
| 1                     | 1.125330  | -2.085157 | 0.612110  | 6 | 14.079305 | -0.000152 | -0.000040 |
| 1                     | 14.557291 | -2.073363 | 0.649946  | 6 | 14.896785 | -1.100906 | 0.322188  |
| <b>Aniline (An)</b>   |           |           |           |   |           |           |           |
| 6                     | 1.167497  | -1.198476 | 0.003556  | 6 | 1.167539  | 1.198478  | 0.003614  |
| 6                     | -0.220872 | -1.203763 | -0.006305 | 1 | 1.700393  | 2.142340  | 0.007099  |
| 6                     | 1.874615  | 0.000003  | 0.009223  | 6 | -0.220817 | 1.203741  | -0.006342 |
| 1                     | -0.762939 | -2.143566 | -0.017012 | 1 | -0.762795 | 2.143585  | -0.017233 |
| 1                     | 2.957092  | -0.000164 | 0.017499  | 1 | 1.700526  | -2.142234 | 0.006901  |
| 6                     | -0.933284 | -0.000014 | -0.008859 | 7 | -2.327919 | 0.000017  | -0.073703 |
| 1                     | -2.772473 | -0.836056 | 0.274743  | 1 | -2.772445 | 0.836165  | 0.274601  |
| <b><sup>2</sup>An</b> |           |           |           |   |           |           |           |
| 6                     | -1.132617 | -0.954554 | 0.838815  | 6 | 1.096244  | -0.224394 | -0.057298 |
| 6                     | -2.520104 | -0.922347 | 0.843557  | 6 | 1.870682  | 0.908626  | 0.259647  |
| 6                     | -0.390038 | -0.165342 | -0.041559 | 6 | 1.743701  | -1.416705 | -0.381172 |
| 6                     | -3.214966 | -0.087410 | -0.036423 | 6 | 3.266721  | 0.811898  | 0.212737  |
| 6                     | -1.092741 | 0.659862  | -0.924669 | 6 | 3.129615  | -1.509979 | -0.419508 |
| 6                     | -2.479673 | 0.703442  | -0.925862 | 6 | 3.887686  | -0.380517 | -0.126715 |
| 1                     | -3.074343 | -1.548167 | 1.535178  | 1 | 1.133240  | -2.280026 | -0.624365 |
| 1                     | -0.540305 | 1.263147  | -1.638704 | 1 | 3.862258  | 1.682803  | 0.466419  |
| 1                     | -3.002276 | 1.339930  | -1.632260 | 1 | 4.970117  | -0.427278 | -0.155451 |
| 7                     | -4.609872 | -0.089511 | -0.071362 | 7 | 1.274647  | 2.088971  | 0.694349  |
| 1                     | -5.031822 | 0.747539  | -0.444522 | 1 | 0.292296  | 2.196526  | 0.494416  |
| 1                     | -5.059844 | -0.392718 | 0.779302  | 1 | 1.810964  | 2.930737  | 0.554915  |
| 1                     | 3.608873  | -2.444623 | -0.681654 | 1 | -0.609644 | -1.599565 | 1.536518  |
| <b><sup>3</sup>An</b> |           |           |           |   |           |           |           |
| 6                     | -2.442758 | -0.849621 | 1.020555  | 6 | 2.765787  | -0.303538 | -0.223315 |
| 6                     | -3.655515 | -1.515523 | 1.119800  | 6 | 2.829295  | -1.377094 | -1.113850 |
| 6                     | -2.203477 | 0.084415  | 0.008547  | 6 | 3.855980  | -0.075565 | 0.639680  |
| 6                     | -4.680030 | -1.265384 | 0.201657  | 6 | 3.936152  | -2.213899 | -1.177988 |
| 6                     | -3.233085 | 0.326829  | -0.907185 | 6 | 4.971531  | -0.916603 | 0.566758  |
| 6                     | -4.449063 | -0.334152 | -0.816678 | 6 | 5.013036  | -1.972993 | -0.330793 |
| 1                     | -3.814242 | -2.237209 | 1.914197  | 1 | 1.988573  | -1.539293 | -1.779995 |

|   |           |           |           |   |           |           |           |
|---|-----------|-----------|-----------|---|-----------|-----------|-----------|
| 1 | -3.070661 | 1.035830  | -1.711802 | 1 | 3.960977  | -3.034789 | -1.883425 |
| 1 | -5.225760 | -0.140589 | -1.549116 | 1 | 5.810486  | -0.733718 | 1.230453  |
| 7 | -5.881029 | -1.970736 | 0.262890  | 1 | 5.889615  | -2.609283 | -0.365723 |
| 1 | -6.669147 | -1.521962 | -0.178861 | 7 | 3.854092  | 0.992501  | 1.541689  |
| 1 | -6.115411 | -2.347700 | 1.168794  | 1 | 4.461590  | 0.861250  | 2.337031  |
| 6 | -0.883511 | 0.756564  | -0.106844 | 1 | 2.935001  | 1.314337  | 1.813615  |
| 6 | -0.775608 | 2.157552  | -0.202363 | 1 | -1.663651 | -1.051102 | 1.747973  |
| 6 | 0.283691  | -0.007616 | -0.096364 | 1 | 0.580820  | 3.809861  | -0.391705 |
| 6 | 0.496446  | 2.731471  | -0.303535 | 1 | 2.612936  | 2.420526  | -0.388934 |
| 6 | 1.555662  | 0.557926  | -0.189112 | 7 | -1.908723 | 2.973171  | -0.228315 |
| 6 | 1.640270  | 1.949911  | -0.297122 | 1 | -2.729134 | 2.575591  | 0.208567  |
| 1 | 0.191172  | -1.086822 | -0.021018 | 1 | -1.742370 | 3.924433  | 0.065017  |

<sup>4</sup>An

|   |           |           |           |   |           |           |           |
|---|-----------|-----------|-----------|---|-----------|-----------|-----------|
| 6 | 3.843783  | 0.652082  | 1.247715  | 6 | -1.102186 | -1.569080 | 0.319398  |
| 6 | 4.715084  | 1.700403  | 1.507669  | 6 | -1.792635 | -0.396298 | 0.008133  |
| 6 | 3.519771  | 0.283738  | -0.059389 | 6 | -1.760485 | -2.566226 | 1.065166  |
| 6 | 5.298681  | 2.416965  | 0.458481  | 6 | -3.111506 | -0.175137 | 0.400516  |
| 6 | 4.100288  | 1.010822  | -1.102920 | 6 | -3.086291 | -2.352846 | 1.457935  |
| 6 | 4.975518  | 2.058379  | -0.854797 | 6 | -3.749231 | -1.179667 | 1.133802  |
| 1 | 4.947785  | 1.970082  | 2.532458  | 1 | -1.285920 | 0.360869  | -0.581974 |
| 1 | 3.842789  | 0.763718  | -2.128402 | 1 | -3.591375 | -3.115896 | 2.041472  |
| 1 | 5.399598  | 2.618738  | -1.681394 | 1 | -4.768982 | -1.027693 | 1.473758  |
| 7 | 6.133106  | 3.504378  | 0.714652  | 7 | -1.126121 | -3.767064 | 1.392489  |
| 1 | 6.770565  | 3.744573  | -0.029444 | 1 | -1.507555 | -4.228322 | 2.205264  |
| 1 | 6.585994  | 3.497670  | 1.616116  | 1 | -0.116495 | -3.718600 | 1.420095  |
| 6 | 2.566296  | -0.825144 | -0.331312 | 1 | 3.408015  | 0.101007  | 2.074001  |
| 6 | 2.977086  | -1.982533 | -1.020211 | 6 | -3.807775 | 1.096003  | 0.065190  |
| 6 | 1.247519  | -0.731701 | 0.108710  | 6 | -3.327424 | 2.307610  | 0.561842  |
| 6 | 2.035239  | -2.989042 | -1.266681 | 6 | -4.951539 | 1.101328  | -0.757189 |
| 6 | 0.305628  | -1.734977 | -0.125022 | 6 | -3.958638 | 3.514471  | 0.285571  |
| 6 | 0.726015  | -2.866902 | -0.831408 | 6 | -5.588799 | 2.318685  | -1.026801 |
| 1 | 0.946858  | 0.163551  | 0.644592  | 6 | -5.101365 | 3.508805  | -0.508301 |
| 1 | 2.345729  | -3.881789 | -1.799687 | 1 | -2.445608 | 2.286984  | 1.193612  |
| 1 | 0.013867  | -3.655544 | -1.048340 | 1 | -3.570389 | 4.441044  | 0.688995  |
| 7 | 4.305727  | -2.173215 | -1.382167 | 1 | -6.464185 | 2.322361  | -1.668072 |
| 1 | 4.890662  | -1.352154 | -1.399540 | 1 | -5.614151 | 4.436803  | -0.733338 |
| 1 | 4.469442  | -2.806628 | -2.148727 | 7 | -5.404630 | -0.064854 | -1.366110 |
| 1 | -5.072331 | -0.934004 | -0.977747 | 1 | -6.379097 | -0.079908 | -1.622309 |

<sup>5</sup>An

|   |          |          |           |   |           |           |           |
|---|----------|----------|-----------|---|-----------|-----------|-----------|
| 6 | 4.050149 | 1.816436 | 1.161841  | 6 | -2.710082 | -1.639254 | -0.288763 |
| 6 | 4.280990 | 3.178695 | 1.289934  | 6 | -2.895707 | -0.294938 | 0.028122  |
| 6 | 4.084840 | 1.187490 | -0.084117 | 6 | -3.647771 | -2.281117 | -1.120628 |
| 6 | 4.560829 | 3.961411 | 0.165597  | 6 | -3.989624 | 0.441288  | -0.430395 |

|   |           |           |           |   |           |           |           |
|---|-----------|-----------|-----------|---|-----------|-----------|-----------|
| 6 | 4.356495  | 1.978402  | -1.204642 | 6 | -4.752371 | -1.551533 | -1.577271 |
| 6 | 4.592396  | 3.340590  | -1.087961 | 6 | -4.922695 | -0.219711 | -1.236161 |
| 1 | 4.243783  | 3.644828  | 2.268885  | 1 | -2.170487 | 0.184442  | 0.678671  |
| 1 | 4.360149  | 1.520038  | -2.188976 | 1 | -5.467381 | -2.035841 | -2.234370 |
| 1 | 4.783675  | 3.936246  | -1.974358 | 1 | -5.779549 | 0.325342  | -1.616834 |
| 7 | 4.740796  | 5.338933  | 0.282095  | 7 | -3.451655 | -3.586416 | -1.555670 |
| 1 | 5.263297  | 5.771780  | -0.464413 | 1 | -4.277359 | -4.094055 | -1.830530 |
| 1 | 5.037314  | 5.660605  | 1.191120  | 1 | -2.780557 | -4.138649 | -1.044738 |
| 6 | 3.809072  | -0.268039 | -0.217073 | 6 | -4.124753 | 1.882677  | -0.097273 |
| 6 | 4.787139  | -1.150990 | -0.714187 | 6 | -5.312488 | 2.404948  | 0.452226  |
| 6 | 2.569840  | -0.777328 | 0.165354  | 6 | -3.050087 | 2.748083  | -0.312198 |
| 6 | 4.468141  | -2.509060 | -0.836735 | 6 | -5.386073 | 3.770792  | 0.746034  |
| 6 | 2.248284  | -2.131202 | 0.055378  | 6 | -3.124546 | 4.102182  | -0.011554 |
| 6 | 3.223807  | -2.989229 | -0.463281 | 6 | -4.306519 | 4.610817  | 0.517133  |
| 1 | 1.828179  | -0.086050 | 0.554172  | 1 | -2.142393 | 2.338583  | -0.742718 |
| 1 | 5.217169  | -3.193035 | -1.222242 | 1 | -6.305237 | 4.168152  | 1.164519  |
| 1 | 2.998864  | -4.043443 | -0.582599 | 1 | -2.276925 | 4.750321  | -0.194995 |
| 7 | 6.074014  | -0.713050 | -1.003931 | 1 | -4.390596 | 5.664822  | 0.754935  |
| 1 | 6.196925  | 0.280470  | -1.123353 | 7 | -6.425023 | 1.588880  | 0.678880  |
| 1 | 6.594882  | -1.270848 | -1.662049 | 1 | -7.051997 | 1.936793  | 1.389374  |
| 6 | 0.895821  | -2.618935 | 0.428734  | 1 | -6.209216 | 0.609639  | 0.809082  |
| 6 | -0.235139 | -1.970865 | -0.070315 | 1 | -0.094500 | -1.136383 | -0.750117 |
| 6 | 0.721811  | -3.717065 | 1.293715  | 1 | -0.712597 | -4.967375 | 2.287038  |
| 6 | -1.531610 | -2.371279 | 0.247731  | 1 | -2.679794 | -3.789967 | 1.386398  |
| 6 | -0.577171 | -4.128171 | 1.612353  | 7 | 1.815302  | -4.413735 | 1.812210  |
| 6 | -1.683132 | -3.467726 | 1.101025  | 1 | 1.623931  | -4.904828 | 2.673006  |
| 1 | 3.843545  | 1.223330  | 2.046073  | 1 | 2.673762  | -3.881419 | 1.858187  |

<sup>6</sup>An

|   |          |           |           |   |           |           |           |
|---|----------|-----------|-----------|---|-----------|-----------|-----------|
| 6 | 4.087665 | 1.444855  | 1.259704  | 6 | -2.268435 | -3.011696 | -0.221535 |
| 6 | 4.115974 | 2.816377  | 1.475465  | 6 | -2.564921 | -1.701140 | 0.143817  |
| 6 | 3.886796 | 0.917485  | -0.016639 | 6 | -3.187793 | -3.719918 | -1.020067 |
| 6 | 3.942919 | 3.706002  | 0.411142  | 6 | -3.740127 | -1.053773 | -0.241625 |
| 6 | 3.709883 | 1.813709  | -1.074597 | 6 | -4.379911 | -3.085929 | -1.393177 |
| 6 | 3.732903 | 3.185818  | -0.869703 | 6 | -4.652064 | -1.780915 | -1.013989 |
| 1 | 4.267776 | 3.204500  | 2.477453  | 1 | -1.852051 | -1.172541 | 0.768903  |
| 1 | 3.532073 | 1.425685  | -2.072549 | 1 | -5.081348 | -3.619161 | -2.026569 |
| 1 | 3.562382 | 3.862271  | -1.700549 | 1 | -5.568945 | -1.308352 | -1.348623 |
| 7 | 3.898052 | 5.084399  | 0.633587  | 7 | -2.894221 | -4.984964 | -1.510846 |
| 1 | 4.138618 | 5.651901  | -0.165916 | 1 | -3.677771 | -5.563856 | -1.766281 |
| 1 | 4.368261 | 5.397896  | 1.470023  | 1 | -2.133395 | -5.481787 | -1.075577 |
| 6 | 3.862292 | -0.553815 | -0.250746 | 6 | -3.949233 | 0.371421  | 0.117746  |
| 6 | 4.950752 | -1.192727 | -0.873851 | 6 | -5.160737 | 0.843977  | 0.657829  |
| 6 | 2.764044 | -1.313218 | 0.141804  | 6 | -2.898239 | 1.274212  | -0.056523 |

|   |           |           |           |   |           |           |           |
|---|-----------|-----------|-----------|---|-----------|-----------|-----------|
| 6 | 4.888715  | -2.574892 | -1.088599 | 6 | -5.272478 | 2.200285  | 0.983447  |
| 6 | 2.692601  | -2.692002 | -0.072342 | 6 | -2.994517 | 2.621684  | 0.283001  |
| 6 | 3.780486  | -3.309250 | -0.698091 | 6 | -4.210037 | 3.073058  | 0.804935  |
| 1 | 1.933337  | -0.805710 | 0.622756  | 1 | -1.972012 | 0.911080  | -0.490193 |
| 1 | 5.724973  | -3.072662 | -1.568517 | 1 | -6.203305 | 2.562694  | 1.408034  |
| 1 | 3.748194  | -4.375232 | -0.895613 | 1 | -4.312987 | 4.111688  | 1.103718  |
| 7 | 6.098120  | -0.481862 | -1.207846 | 7 | -6.253109 | -0.007245 | 0.851793  |
| 1 | 5.990935  | 0.519046  | -1.281854 | 1 | -6.899243 | 0.311474  | 1.559129  |
| 1 | 6.663746  | -0.881423 | -1.940500 | 1 | -6.007595 | -0.980406 | 0.977319  |
| 6 | 1.466658  | -3.445854 | 0.295513  | 6 | -1.819065 | 3.520965  | 0.136227  |
| 6 | 0.222340  | -2.966355 | -0.112425 | 6 | -1.856865 | 4.654981  | -0.697061 |
| 6 | 1.518399  | -4.626765 | 1.061599  | 6 | -0.642305 | 3.231693  | 0.829432  |
| 6 | -0.974989 | -3.605648 | 0.206549  | 6 | -0.723826 | 5.474151  | -0.781015 |
| 6 | 0.321639  | -5.278413 | 1.380307  | 6 | 0.481829  | 4.041954  | 0.737661  |
| 6 | -0.902688 | -4.776908 | 0.965082  | 6 | 0.428451  | 5.174613  | -0.069075 |
| 1 | 0.190751  | -2.067613 | -0.720241 | 1 | -0.628701 | 2.354220  | 1.467711  |
| 1 | 0.359193  | -6.180297 | 1.982800  | 1 | -0.753519 | 6.343003  | -1.430931 |
| 1 | -1.816049 | -5.283683 | 1.261132  | 1 | 1.383194  | 3.801498  | 1.286664  |
| 7 | 2.736158  | -5.165615 | 1.480950  | 1 | 1.295928  | 5.820683  | -0.139788 |
| 1 | 2.670395  | -5.755822 | 2.297113  | 7 | -2.965369 | 4.925250  | -1.497211 |
| 1 | 3.492300  | -4.497949 | 1.551663  | 1 | -3.099091 | 5.891812  | -1.749539 |
| 1 | 4.230337  | 0.767775  | 2.094778  | 1 | -3.820493 | 4.451400  | -1.250137 |

**HAzB<sub>C1</sub>**

|   |           |           |           |   |           |           |           |
|---|-----------|-----------|-----------|---|-----------|-----------|-----------|
| 6 | -1.405266 | 0.028952  | 0.001509  | 1 | -0.526905 | 3.536038  | -1.773910 |
| 6 | -0.727391 | -1.203279 | 0.001199  | 1 | -2.702403 | 2.333334  | 1.781829  |
| 6 | 0.678716  | -1.232304 | 0.001565  | 1 | 2.796040  | 2.221148  | -1.778702 |
| 6 | 1.406784  | -0.029047 | 0.001694  | 1 | 0.674540  | 3.510384  | 1.779414  |
| 6 | 0.728893  | 1.203214  | 0.002201  | 1 | 3.378357  | 1.171526  | 1.778383  |
| 6 | -0.677191 | 1.232224  | 0.002511  | 1 | 3.321116  | -1.310709 | -1.779398 |
| 6 | -1.392260 | 2.531111  | 0.003553  | 1 | 2.704557  | -2.333650 | 1.780267  |
| 6 | 1.496641  | 2.471592  | 0.000825  | 1 | 0.527705  | -3.535978 | -1.774775 |
| 6 | 2.889105  | -0.059817 | 0.000094  | 1 | -0.674823 | -3.510247 | 1.779052  |
| 6 | 1.393705  | -2.531198 | 0.002290  | 1 | -2.794820 | -2.220109 | -1.779610 |
| 6 | -1.495740 | -2.471323 | -0.000153 | 1 | -3.376609 | -1.171464 | 1.778396  |
| 6 | -2.887648 | 0.059444  | -0.000291 | 1 | -3.319792 | 1.309323  | -1.780376 |
| 6 | -1.218358 | 3.555333  | -0.942456 | 1 | 4.353026  | 4.269207  | -2.184423 |
| 6 | -2.062773 | 4.618678  | -0.611227 | 1 | 5.267281  | 6.375330  | -1.728296 |
| 6 | -2.798664 | 4.211808  | 0.622219  | 1 | 4.750508  | 7.843830  | -0.006134 |
| 6 | -2.350336 | 2.929788  | 0.951120  | 1 | 3.211477  | 7.625356  | 1.717921  |
| 6 | 2.469050  | 2.831062  | -0.947509 | 1 | 1.768510  | 5.840416  | 2.179270  |
| 6 | 2.969659  | 4.093856  | -0.618724 | 1 | -1.524054 | 5.909054  | -2.173456 |
| 6 | 2.252038  | 4.530013  | 0.615557  | 1 | -2.892706 | 7.751358  | -1.712540 |
| 6 | 1.365478  | 3.502060  | 0.947350  | 1 | -4.423738 | 8.031899  | 0.009840  |



|   |           |           |           |   |           |           |           |
|---|-----------|-----------|-----------|---|-----------|-----------|-----------|
| 6 | 3.716034  | 0.568746  | 0.946261  | 1 | -5.003057 | 6.584567  | 1.729916  |
| 6 | 5.049686  | 0.314782  | 0.614059  | 1 | -4.175959 | 4.442453  | 2.186123  |
| 6 | 5.030262  | -0.525021 | -0.620009 | 1 | -5.941522 | -1.389197 | 2.177410  |
| 6 | 3.686495  | -0.722851 | -0.948305 | 1 | -8.208474 | -1.033131 | 1.714996  |
| 6 | 2.351877  | -2.930013 | 0.949750  | 1 | -8.153468 | 1.371543  | -1.731741 |
| 6 | 2.799350  | -4.212434 | 0.621309  | 1 | -5.872026 | 1.633856  | -2.186781 |
| 6 | 2.062977  | -4.619374 | -0.611821 | 1 | -1.771663 | -5.838940 | 2.180090  |
| 6 | 1.219182  | -3.555634 | -0.943357 | 1 | -3.216528 | -7.622103 | 1.719525  |
| 6 | -1.365770 | -3.501342 | 0.946996  | 1 | -4.755886 | -7.839704 | -0.004557 |
| 6 | -2.253406 | -4.528551 | 0.615697  | 1 | -5.271132 | -6.371440 | -1.727169 |
| 6 | -2.970585 | -4.092220 | -0.618788 | 1 | -4.354201 | -4.266367 | -2.184266 |
| 6 | -2.468629 | -2.830164 | -0.948207 | 1 | 4.176645  | -4.443794 | 2.185246  |
| 6 | -3.714464 | -0.568991 | 0.946118  | 1 | 5.001897  | -6.586440 | 1.729730  |
| 6 | -5.048118 | -0.315471 | 0.613785  | 1 | 4.421557  | -8.033982 | 0.009981  |
| 6 | -5.028862 | 0.523807  | -0.620657 | 1 | 2.890620  | -7.753076 | -1.712197 |
| 6 | -3.685066 | 0.721668  | -0.949091 | 1 | 1.522913  | -5.909749 | -2.173446 |
| 6 | 3.955300  | 4.783549  | -1.312639 | 1 | 5.943214  | 1.388810  | 2.177373  |
| 6 | 4.499236  | 6.036544  | -1.041125 | 1 | 8.210139  | 1.032057  | 1.715201  |
| 6 | 4.187631  | 6.914780  | -0.005091 | 1 | 9.168528  | -0.190932 | -0.009681 |
| 6 | 3.265862  | 6.786274  | 1.032465  | 1 | 8.154761  | -1.373449 | -1.730951 |
| 6 | 2.407671  | 5.724654  | 1.307017  | 1 | 5.873270  | -1.635702 | -2.185819 |
| 6 | -2.168398 | 5.818844  | -1.302007 | 1 | -9.167068 | 0.189286  | -0.010194 |
| 6 | -2.982621 | 6.914886  | -1.027631 | 6 | -4.191891 | -6.911331 | -0.003875 |
| 6 | -3.899465 | 7.080521  | 0.008672  | 6 | -4.502598 | -6.033169 | -1.040296 |
| 6 | -4.248424 | 6.214926  | 1.043796  | 6 | -3.957167 | -4.781010 | -1.312341 |
| 6 | -3.756512 | 4.940863  | 1.315255  | 6 | 3.756640  | -4.942001 | 1.314534  |
| 6 | -6.160436 | -0.778063 | 1.304865  | 6 | 4.247531  | -6.216550 | 1.043444  |
| 6 | -7.509087 | -0.566271 | 1.029594  | 6 | 3.897962  | -7.082231 | 0.008618  |
| 6 | -8.081034 | 0.166984  | -0.008328 | 6 | 2.981108  | -6.916374 | -1.027649 |
| 6 | -7.475973 | 0.876254  | -1.044311 | 6 | 2.167604  | -5.819870 | -1.302216 |
| 6 | -6.119020 | 1.032240  | -1.315113 | 6 | 6.162022  | 0.777337  | 1.305040  |
| 6 | -2.410530 | -5.722620 | 1.307699  | 6 | 7.510696  | 0.565158  | 1.029885  |
| 6 | -3.270011 | -6.783359 | 1.033580  | 6 | 8.082497  | -0.168433 | -0.007808 |
| 6 | 6.120388  | -1.033827 | -1.314366 | 6 | 7.477310  | -0.877909 | -1.043660 |

**HAzB<sub>C6</sub>**

|   |           |           |           |   |           |           |           |
|---|-----------|-----------|-----------|---|-----------|-----------|-----------|
| 6 | -1.175869 | -0.768133 | 0.000092  | 6 | -6.409224 | -3.569868 | -1.035541 |
| 6 | 0.077211  | -1.402472 | 0.000768  | 6 | -0.107507 | -7.338400 | -1.020457 |
| 6 | 1.253039  | -0.634308 | 0.000537  | 6 | 0.447542  | -8.111581 | 0.007369  |
| 6 | 1.175868  | 0.768133  | 0.000037  | 6 | 0.914189  | -7.279867 | 1.033523  |
| 6 | -0.077211 | 1.402472  | 0.000767  | 6 | 6.301850  | -3.759430 | -1.025871 |
| 6 | -1.253039 | 0.634307  | 0.000591  | 6 | 7.250498  | -3.663883 | 0.000381  |
| 6 | -2.594694 | 1.313145  | 0.000928  | 6 | 6.764278  | -2.844055 | 1.027010  |
| 6 | -2.435071 | -1.589927 | -0.001883 | 1 | -1.449660 | 5.023313  | 2.378084  |

|   |           |           |           |   |           |           |           |
|---|-----------|-----------|-----------|---|-----------|-----------|-----------|
| 6 | 0.160117  | -2.903851 | 0.001883  | 1 | -1.076290 | 2.782196  | 1.892284  |
| 6 | 2.594694  | -1.313146 | 0.000816  | 1 | -4.020479 | 3.347882  | -2.371367 |
| 6 | 2.435070  | 1.589927  | -0.002000 | 1 | -5.078051 | 1.253286  | 2.373847  |
| 6 | -0.160116 | 2.903851  | 0.001882  | 1 | -2.949277 | 0.457686  | 1.890392  |
| 6 | 0.355015  | 3.546326  | -1.128564 | 1 | -3.634619 | -3.766342 | 2.369884  |
| 6 | 0.429344  | 4.905302  | -1.416111 | 1 | -4.904966 | -1.804503 | -2.379874 |
| 6 | 0.001493  | 5.988160  | -0.661522 | 1 | -2.877373 | -0.779787 | -1.892766 |
| 6 | -0.660488 | 5.950283  | 0.671785  | 1 | 1.449766  | -5.023305 | 2.378035  |
| 6 | -0.966608 | 4.825252  | 1.423946  | 1 | 1.076371  | -2.782190 | 1.892246  |
| 6 | -0.743054 | 3.483412  | 1.133507  | 1 | 4.020377  | -3.347883 | -2.371540 |
| 6 | -2.892240 | 2.081307  | -1.129295 | 1 | 5.078151  | -1.253290 | 2.373631  |
| 6 | -4.032168 | 2.824426  | -1.418053 | 1 | 2.949357  | -0.457689 | 1.890266  |
| 6 | -5.185272 | 2.993565  | -0.665218 | 1 | 1.876932  | 2.324882  | 1.889133  |
| 6 | -5.484883 | 2.400487  | 0.667366  | 1 | 3.634723  | 3.766359  | 2.369699  |
| 6 | -4.663946 | 1.573339  | 1.420413  | 1 | 4.904856  | 1.804493  | -2.380105 |
| 6 | -3.389345 | 1.097116  | 1.131464  | 1 | 5.892036  | 4.997648  | 1.935988  |
| 6 | -2.649104 | -2.385166 | 1.128647  | 1 | 7.711273  | 5.027852  | -0.010993 |
| 6 | -3.701411 | -3.248271 | 1.415901  | 1 | 6.944388  | 3.372742  | -1.953646 |
| 6 | -4.827415 | -3.543481 | 0.660778  | 1 | 0.546235  | 7.706128  | -1.936949 |
| 6 | -5.187160 | -2.988082 | -0.673164 | 1 | -0.507065 | 9.191779  | 0.008556  |
| 6 | -4.460353 | -2.076442 | -1.425246 | 1 | -1.390482 | 7.595322  | 1.950737  |
| 6 | -3.246279 | -1.463021 | -1.134081 | 1 | -6.400155 | 4.323548  | -1.941993 |
| 6 | -0.355063 | -3.546330 | -1.128539 | 1 | -8.216290 | 4.151347  | 0.000542  |
| 6 | -0.429401 | -4.905306 | -1.416080 | 1 | -7.276783 | 2.588258  | 1.943557  |
| 6 | -0.001515 | -5.988162 | -0.661507 | 1 | -5.891954 | -4.997629 | 1.936284  |
| 6 | 0.660523  | -5.950281 | 0.671772  | 1 | -7.711280 | -5.027842 | -0.010613 |
| 6 | 0.966673  | -4.825247 | 1.423917  | 1 | -6.944481 | -3.372745 | -1.953311 |
| 6 | 0.743104  | -3.483409 | 1.133485  | 1 | -0.546308 | -7.706135 | -1.936907 |
| 6 | 2.892192  | -2.081307 | -1.129420 | 1 | 0.507079  | -9.191779 | 0.008557  |
| 6 | 4.032106  | -2.824428 | -1.418225 | 1 | 1.390575  | -7.595316 | 1.950696  |
| 6 | 5.185241  | -2.993570 | -0.665439 | 1 | 6.400068  | -4.323554 | -1.942264 |
| 6 | 5.484909  | -2.400492 | 0.667132  | 1 | 8.216285  | -4.151357 | 0.000195  |
| 6 | 4.664005  | -1.573343 | 1.420214  | 1 | 7.276862  | -2.588266 | 1.943248  |
| 6 | 3.389392  | -1.097119 | 1.131319  | 1 | 0.763204  | 2.887645  | -1.888837 |
| 6 | 2.649154  | 2.385173  | 1.128515  | 1 | 0.887409  | 5.157425  | -2.369821 |
| 6 | 3.701473  | 3.248282  | 1.415716  | 1 | -2.116495 | 2.106734  | -1.888291 |
| 6 | 4.827441  | 3.543490  | 0.660540  | 1 | -1.876847 | -2.324871 | 1.889228  |
| 6 | 5.187126  | 2.988083  | -0.673415 | 1 | -0.763285 | -2.887652 | -1.888796 |
| 6 | 4.460286  | 2.076437  | -1.425458 | 1 | -0.887507 | -5.157433 | -2.369769 |
| 6 | 3.246226  | 1.463016  | -1.134234 | 1 | 2.116415  | -2.106732 | -1.888384 |
| 6 | 5.854042  | 4.426920  | 1.019204  | 1 | 2.877287  | 0.779776  | -1.892898 |
| 6 | 6.804927  | 4.437156  | -0.009501 | 6 | -6.301897 | 3.759424  | -1.025604 |
| 6 | 6.409172  | 3.569870  | -1.035853 | 6 | -7.250502 | 3.663874  | 0.000688  |

|   |           |          |           |   |           |           |           |
|---|-----------|----------|-----------|---|-----------|-----------|-----------|
| 6 | 0.107473  | 7.338397 | -1.020480 | 6 | -6.764237 | 2.844047  | 1.027297  |
| 6 | -0.447531 | 8.111581 | 0.007368  | 6 | -5.854002 | -4.426907 | 1.019496  |
| 6 | -0.914135 | 7.279871 | 1.033544  | 6 | -6.804933 | -4.437147 | -0.009166 |

---

$(P)_2$

|   |          |           |           |   |           |           |           |
|---|----------|-----------|-----------|---|-----------|-----------|-----------|
| 6 | 1.568875 | 1.118319  | -0.501676 | 6 | -1.569072 | -1.118385 | 0.501578  |
| 7 | 1.031710 | -0.000160 | -1.076453 | 7 | -1.031956 | -0.000034 | 1.076704  |
| 6 | 1.569117 | -1.118415 | -0.501437 | 6 | -1.569068 | 1.118360  | 0.501660  |
| 6 | 2.483626 | -0.712885 | 0.440799  | 6 | -2.483362 | 0.713068  | -0.440878 |
| 6 | 2.483534 | 0.713181  | 0.440596  | 6 | -2.483370 | -0.713014 | -0.440924 |
| 1 | 1.256527 | 2.103317  | -0.807202 | 1 | -1.256839 | -2.103460 | 0.806978  |
| 1 | 0.213869 | -0.000326 | -1.668772 | 1 | -3.098328 | 1.361727  | -1.044045 |
| 1 | 3.098493 | 1.361956  | 1.043643  | 1 | -3.098523 | -1.361633 | -1.043943 |
| 1 | 1.257051 | -2.103551 | -0.806792 | 1 | -1.256867 | 2.103420  | 0.807148  |
| 1 | 3.098715 | -1.361402 | 1.044003  | 1 | -0.214051 | -0.000071 | 1.668924  |

$(^2P_{C3N1'})_2$

|   |           |           |           |   |           |           |           |
|---|-----------|-----------|-----------|---|-----------|-----------|-----------|
| 6 | -2.469807 | 0.418071  | -1.049212 | 6 | 3.730733  | -0.029860 | -0.663408 |
| 7 | -1.875574 | 1.058303  | 0.007308  | 1 | 1.926170  | -0.274401 | -1.967476 |
| 6 | -2.744238 | 1.073119  | 1.068731  | 1 | 4.776602  | -0.300206 | 1.304097  |
| 6 | -3.903020 | 0.441319  | 0.686261  | 1 | 4.445813  | 0.491961  | -1.279853 |
| 6 | -3.729837 | 0.027301  | -0.663826 | 1 | 2.465130  | -1.548879 | 1.996056  |
| 1 | -1.923489 | 0.266546  | -1.966371 | 6 | -1.457405 | -2.273783 | 0.660813  |
| 1 | -4.778551 | 0.305939  | 1.300988  | 7 | -1.269321 | -2.621595 | -0.644969 |
| 1 | -4.443748 | -0.497776 | -1.278856 | 6 | -0.026958 | -2.224175 | -1.066185 |
| 1 | -2.468682 | 1.558831  | 1.990564  | 6 | 0.582972  | -1.617811 | 0.006392  |
| 6 | 1.456450  | 2.275815  | 0.658609  | 6 | -0.316643 | -1.653513 | 1.105339  |
| 7 | 1.271572  | 2.616367  | -0.649512 | 1 | -2.395230 | -2.452901 | 1.159210  |
| 6 | 0.029711  | 2.217872  | -1.071179 | 1 | -1.977024 | -3.021671 | -1.236832 |
| 6 | -0.583278 | 1.618466  | 0.003541  | 1 | -0.153524 | -1.243316 | 2.088425  |
| 6 | 0.313986  | 1.659437  | 1.104234  | 1 | 0.334868  | -2.422554 | -2.060952 |
| 1 | 2.393342  | 2.456986  | 1.158011  | 6 | 2.471003  | -0.421667 | -1.048744 |
| 1 | 1.981602  | 3.010656  | -1.242482 | 7 | 1.874973  | -1.056847 | 0.009830  |
| 1 | 0.147708  | 1.256025  | 2.089611  | 6 | 2.742286  | -1.067520 | 1.072419  |
| 1 | -0.329526 | 2.410582  | -2.067992 | 6 | 3.901874  | -0.437975 | 0.688758  |

$(^3P_{C3N1'})_2$

|   |           |          |           |   |           |           |           |
|---|-----------|----------|-----------|---|-----------|-----------|-----------|
| 6 | -0.032411 | 2.272437 | 1.660161  | 7 | -3.803501 | -2.634413 | -0.225763 |
| 7 | 0.386000  | 1.930540 | 0.402484  | 6 | -2.686650 | -2.640888 | 0.565296  |
| 6 | -0.690635 | 1.513389 | -0.336824 | 6 | -1.715073 | -1.945877 | -0.114043 |
| 6 | -1.805180 | 1.612565 | 0.461706  | 6 | -2.260214 | -1.509640 | -1.350882 |
| 6 | -1.393057 | 2.089855 | 1.734303  | 1 | -4.331983 | -1.794886 | -2.115323 |

|   |           |           |           |   |           |           |           |
|---|-----------|-----------|-----------|---|-----------|-----------|-----------|
| 1 | 0.671445  | 2.653028  | 2.382084  | 1 | -2.653959 | -3.142431 | 1.517921  |
| 1 | -0.569019 | 1.154146  | -1.345244 | 6 | 0.737520  | -1.811702 | -0.390411 |
| 6 | 3.488089  | 2.207760  | -1.417478 | 7 | -0.409817 | -1.696466 | 0.355595  |
| 7 | 3.907891  | 1.794254  | -0.185799 | 6 | -0.093587 | -1.271701 | 1.615033  |
| 6 | 2.833655  | 1.622167  | 0.641191  | 6 | 1.268861  | -1.115759 | 1.695662  |
| 6 | 1.713522  | 1.968137  | -0.071947 | 6 | 1.789861  | -1.452319 | 0.418783  |
| 6 | 2.121793  | 2.347553  | -1.380590 | 1 | 0.709158  | -2.176996 | -1.403452 |
| 1 | 4.188206  | 2.372769  | -2.219235 | 1 | 1.817617  | -0.767210 | 2.555790  |
| 1 | 4.826447  | 1.427396  | 0.014694  | 1 | -0.871891 | -1.061523 | 2.330208  |
| 1 | 1.487744  | 2.702904  | -2.176951 | 1 | -1.765465 | -0.920929 | -2.106176 |
| 1 | 2.940348  | 1.233746  | 1.639466  | 6 | 4.212941  | -1.519252 | 0.893361  |
| 6 | -4.038726 | 0.617971  | 0.815011  | 7 | 3.146447  | -1.401313 | 0.039066  |
| 7 | -3.128988 | 1.322973  | 0.070627  | 6 | 3.612300  | -1.189219 | -1.232535 |
| 6 | -3.720722 | 1.721486  | -1.101499 | 6 | 4.986325  | -1.184001 | -1.195519 |
| 6 | -5.018572 | 1.269525  | -1.104508 | 6 | 5.370145  | -1.386298 | 0.159696  |
| 6 | -5.221844 | 0.569752  | 0.117017  | 1 | 4.055757  | -1.731684 | 1.938326  |
| 1 | -3.750066 | 0.196671  | 1.764790  | 1 | 5.638355  | -1.042255 | -2.042856 |
| 1 | -5.742335 | 1.438670  | -1.885914 | 1 | 6.373246  | -1.462203 | 0.548783  |
| 1 | -3.170582 | 2.320851  | -1.808609 | 1 | 2.923273  | -1.010714 | -2.041976 |
| 1 | -2.029481 | 2.306654  | 2.577268  | 1 | -4.697141 | -3.012278 | 0.038663  |
| 6 | -3.559411 | -1.949579 | -1.381454 | 1 | -6.129489 | 0.089074  | 0.447093  |

$({}^4P_{C_3N_1'})_2$

|   |           |          |           |   |           |           |           |
|---|-----------|----------|-----------|---|-----------|-----------|-----------|
| 6 | 4.573847  | 1.438156 | 1.048581  | 7 | 1.335372  | -1.796488 | 0.282630  |
| 7 | 5.730680  | 1.888375 | 0.478571  | 1 | 2.233955  | -1.520554 | -1.640443 |
| 6 | 5.446152  | 2.731791 | -0.557059 | 1 | 1.128720  | -2.042489 | 2.383583  |
| 6 | 4.081414  | 2.867524 | -0.636766 | 1 | 3.820799  | -1.670036 | 2.401986  |
| 6 | 3.535462  | 2.037913 | 0.381344  | 6 | -0.407509 | -2.720837 | -1.281760 |
| 1 | 4.569548  | 0.705345 | 1.837345  | 6 | 0.000848  | -2.021667 | -0.115669 |
| 1 | 3.534876  | 3.500518 | -1.317345 | 6 | -1.126606 | -1.632243 | 0.568268  |
| 1 | 6.229842  | 3.172433 | -1.150163 | 7 | -2.211121 | -2.090011 | -0.136069 |
| 6 | 1.189006  | 1.765929 | -0.313935 | 6 | -1.781611 | -2.738365 | -1.261303 |
| 7 | 2.163811  | 1.846299 | 0.648918  | 1 | 0.231133  | -3.185769 | -2.015485 |
| 6 | 1.594771  | 1.713990 | 1.884164  | 1 | -2.489785 | -3.194965 | -1.932686 |
| 6 | 0.241241  | 1.530539 | 1.726704  | 1 | -1.242059 | -1.017642 | 1.446098  |
| 6 | -0.008847 | 1.567594 | 0.328730  | 6 | -4.652731 | -1.793762 | -0.676260 |
| 1 | 1.429837  | 1.843812 | -1.361022 | 6 | -3.561558 | -1.911083 | 0.225344  |
| 1 | -0.482662 | 1.393166 | 2.514228  | 6 | -4.048871 | -1.812042 | 1.506435  |
| 1 | 2.201718  | 1.773300 | 2.772440  | 7 | -5.404449 | -1.635053 | 1.401195  |
| 6 | -1.478374 | 0.819993 | -1.509329 | 6 | -5.777420 | -1.614477 | 0.089238  |
| 7 | -1.260427 | 1.404199 | -0.292499 | 1 | -4.606843 | -1.794708 | -1.753019 |
| 6 | -2.465236 | 1.757691 | 0.265444  | 1 | -6.023434 | -1.452649 | 2.172594  |

|   |           |           |           |   |           |           |           |
|---|-----------|-----------|-----------|---|-----------|-----------|-----------|
| 6 | -3.452413 | 1.382396  | -0.614686 | 1 | -6.797207 | -1.424017 | -0.201027 |
| 6 | -2.831166 | 0.794966  | -1.747797 | 1 | -3.549481 | -1.878735 | 2.458183  |
| 1 | -0.658064 | 0.406806  | -2.073785 | 1 | 8.095946  | -1.442669 | -0.232613 |
| 1 | -3.318546 | 0.362442  | -2.606405 | 1 | 6.632125  | 1.468782  | 0.647181  |
| 1 | -2.513485 | 2.286639  | 1.202449  | 6 | 5.990637  | -1.684783 | 0.312910  |
| 6 | -5.785937 | 1.609721  | -1.394684 | 6 | 7.055633  | -1.253180 | -0.445350 |
| 7 | -4.837166 | 1.529426  | -0.407588 | 6 | 6.518904  | -0.565162 | -1.568804 |
| 6 | -5.457160 | 1.592195  | 0.813610  | 6 | 5.150734  | -0.593248 | -1.446473 |
| 6 | -6.809845 | 1.719481  | 0.606819  | 7 | 4.833492  | -1.284692 | -0.305442 |
| 6 | -7.019416 | 1.727057  | -0.800540 | 1 | 5.953660  | -2.283070 | 1.208731  |
| 1 | -5.495807 | 1.605755  | -2.432509 | 1 | 4.375882  | -0.133201 | -2.038453 |
| 1 | -7.561370 | 1.800968  | 1.376231  | 1 | 7.068908  | -0.089119 | -2.365015 |
| 1 | -7.960409 | 1.825068  | -1.317807 | 6 | 2.387764  | -1.594197 | -0.576791 |
| 1 | -4.880084 | 1.508266  | 1.720293  | 6 | 3.531265  | -1.513626 | 0.181131  |
| 6 | 1.804225  | -1.857409 | 1.565019  | 6 | 3.166286  | -1.677200 | 1.544869  |

$({}^5P_{C3N1'})_2$

|   |           |          |           |   |           |           |           |
|---|-----------|----------|-----------|---|-----------|-----------|-----------|
| 6 | 3.892885  | 2.905200 | 0.961361  | 7 | -0.684472 | -1.846613 | -0.455059 |
| 7 | 4.245605  | 2.159269 | -0.130818 | 1 | 0.129158  | -2.120108 | 1.509581  |
| 6 | 3.115631  | 1.723904 | -0.771094 | 1 | -0.806564 | -1.416640 | -2.534105 |
| 6 | 2.035983  | 2.221859 | -0.081325 | 1 | 1.847969  | -0.872959 | -2.279600 |
| 6 | 2.521415  | 2.969819 | 1.023050  | 1 | 2.196905  | -0.111477 | 2.142645  |
| 1 | 4.652217  | 3.358701 | 1.577068  | 6 | -3.118100 | -1.630797 | -0.849159 |
| 1 | 3.173651  | 1.063340 | -1.620033 | 6 | -2.032283 | -2.181389 | -0.211375 |
| 6 | 7.378593  | 1.349493 | -1.726172 | 6 | -2.503801 | -3.112453 | 0.748725  |
| 7 | 7.677203  | 1.211777 | -0.400764 | 6 | -3.876696 | -3.096445 | 0.659195  |
| 6 | 6.571729  | 1.473774 | 0.357376  | 7 | -4.240198 | -2.208552 | -0.315050 |
| 6 | 5.562445  | 1.819741 | -0.505360 | 1 | -3.189383 | -0.828183 | -1.565974 |
| 6 | 6.067804  | 1.748128 | -1.832242 | 1 | -4.625888 | -3.675841 | 1.173363  |
| 1 | 8.116882  | 1.159129 | -2.487052 | 1 | -1.909294 | -3.742802 | 1.390311  |
| 1 | 8.498737  | 0.748308 | -0.041361 | 6 | -6.066778 | -1.643491 | -1.967077 |
| 1 | 5.536812  | 1.987370 | -2.739596 | 6 | -5.562113 | -1.852950 | -0.654811 |
| 1 | 6.571616  | 1.351646 | 1.427307  | 6 | -6.576465 | -1.616175 | 0.238566  |
| 6 | -0.283441 | 1.662300 | 0.511130  | 7 | -7.684704 | -1.288881 | -0.489244 |
| 7 | 0.675493  | 2.019422 | -0.401402 | 6 | -7.383241 | -1.277908 | -1.821404 |
| 6 | 0.093301  | 2.198659 | -1.625423 | 1 | -5.529456 | -1.772125 | -2.892913 |
| 6 | -1.253219 | 1.940835 | -1.513413 | 1 | -8.123816 | -1.015876 | -2.558390 |
| 6 | -1.485372 | 1.605643 | -0.152710 | 1 | -6.579064 | -1.613453 | 1.315602  |
| 1 | -0.032835 | 1.487926 | 1.544329  | 1 | -8.514946 | -0.882654 | -0.084246 |
| 1 | -1.982537 | 1.985819 | -2.306540 | 1 | -9.353969 | 1.691963  | 1.835864  |
| 1 | 0.687687  | 2.506226 | -2.469943 | 7 | 2.734951  | -1.287160 | 0.455400  |
| 1 | 1.930624  | 3.514247 | 1.742285  | 6 | 2.994564  | -0.600643 | 1.607957  |

|   |           |           |           |   |           |           |           |
|---|-----------|-----------|-----------|---|-----------|-----------|-----------|
| 6 | -3.942736 | 1.763579  | 0.000997  | 1 | 4.862838  | -0.138718 | 2.652200  |
| 7 | -2.728111 | 1.286405  | 0.429913  | 1 | 3.921842  | -2.356268 | -0.965910 |
| 6 | -2.919315 | 0.457512  | 1.499700  | 6 | 8.253672  | -2.048631 | -0.401698 |
| 6 | -4.264943 | 0.390076  | 1.769729  | 6 | 8.468204  | -1.900362 | 0.997341  |
| 6 | -4.909275 | 1.217997  | 0.812966  | 6 | 7.245309  | -1.629955 | 1.568450  |
| 1 | -4.010441 | 2.488551  | -0.792702 | 7 | 6.302159  | -1.602310 | 0.573127  |
| 1 | -4.728956 | -0.212568 | 2.533927  | 6 | 6.912554  | -1.850441 | -0.628874 |
| 1 | -2.087705 | -0.067835 | 1.940755  | 1 | 8.993974  | -2.268995 | -1.154487 |
| 6 | -6.965237 | 1.797792  | -0.434416 | 1 | 9.399201  | -2.013994 | 1.529905  |
| 7 | -6.296428 | 1.448214  | 0.709839  | 1 | 6.345635  | -1.817746 | -1.544988 |
| 6 | -7.193621 | 1.357554  | 1.743247  | 1 | 6.957554  | -1.499349 | 2.598918  |
| 6 | -8.446057 | 1.652877  | 1.254922  | 6 | 0.314946  | -1.844475 | 0.484503  |
| 6 | -8.298283 | 1.941203  | -0.130986 | 6 | 1.468901  | -1.442373 | -0.146687 |
| 1 | -6.439152 | 1.867561  | -1.372548 | 6 | 1.165126  | -1.196767 | -1.510674 |
| 1 | -9.076169 | 2.215934  | -0.825804 | 6 | -0.173300 | -1.460920 | -1.663744 |
| 1 | -6.855890 | 1.133952  | 2.742124  | 6 | 4.928576  | -1.343169 | 0.758570  |
| 6 | 4.350363  | -0.617261 | 1.833105  | 6 | 3.914322  | -1.747020 | -0.077508 |

$({}^6P_{C3N1'})_2$

|   |            |           |           |   |           |           |           |
|---|------------|-----------|-----------|---|-----------|-----------|-----------|
| 6 | -5.876954  | -2.097329 | 1.955719  | 7 | 4.298027  | -1.235871 | -0.450679 |
| 7 | -6.189433  | -1.868255 | 0.642549  | 6 | 5.472670  | -1.701372 | 0.086969  |
| 6 | -5.043690  | -1.894221 | -0.107440 | 6 | 6.489088  | -1.336654 | -0.765067 |
| 6 | -3.998393  | -2.164241 | 0.742958  | 6 | 5.917449  | -0.630628 | -1.855742 |
| 6 | -4.518498  | -2.287717 | 2.058114  | 1 | 3.769505  | -0.105289 | -2.172530 |
| 1 | -6.655509  | -2.141290 | 2.699576  | 1 | 6.439875  | -0.182045 | -2.685364 |
| 1 | -5.061248  | -1.687725 | -1.165100 | 1 | 5.477612  | -2.297311 | 0.984659  |
| 6 | -9.242911  | -1.685381 | -1.268101 | 6 | 8.740499  | -1.920169 | -1.596750 |
| 7 | -9.540945  | -0.927671 | -0.172047 | 7 | 7.853304  | -1.639793 | -0.589151 |
| 6 | -8.466306  | -0.877758 | 0.670044  | 6 | 8.499322  | -1.734119 | 0.615955  |
| 6 | -7.478039  | -1.648123 | 0.110662  | 6 | 9.807098  | -2.083919 | 0.378429  |
| 6 | -7.966651  | -2.170576 | -1.119046 | 6 | 9.961728  | -2.198533 | -1.030878 |
| 1 | -9.956537  | -1.821410 | -2.063304 | 1 | 8.412767  | -1.929266 | -2.623501 |
| 1 | -10.328906 | -0.301121 | -0.104061 | 1 | #####     | -2.235320 | 1.129853  |
| 1 | -7.447455  | -2.838235 | -1.787761 | 1 | #####     | -2.468389 | -1.567610 |
| 1 | -8.471208  | -0.278043 | 1.563604  | 1 | 7.974416  | -1.508383 | 1.530404  |
| 6 | -1.556917  | -1.781105 | 0.932682  | 6 | -6.258777 | 1.473968  | 1.382126  |
| 7 | -2.657854  | -2.344353 | 0.339531  | 6 | -6.569157 | 1.688929  | 0.013994  |
| 6 | -2.264434  | -3.085252 | -0.740381 | 6 | -5.401188 | 1.603034  | -0.707985 |
| 6 | -0.895633  | -3.015595 | -0.846663 | 7 | -4.390925 | 1.329599  | 0.181187  |
| 6 | -0.455381  | -2.187200 | 0.216668  | 6 | -4.905679 | 1.248081  | 1.444198  |
| 1 | -1.660679  | -1.079016 | 1.744403  | 1 | -6.944942 | 1.453782  | 2.213441  |
| 1 | -0.284153  | -3.528307 | -1.571394 | 1 | -5.197998 | 1.757614  | -1.754606 |

|   |           |           |           |   |           |           |           |
|---|-----------|-----------|-----------|---|-----------|-----------|-----------|
| 1 | -2.990790 | -3.641084 | -1.310091 | 6 | -9.606687 | 1.921109  | -1.887108 |
| 1 | -3.964929 | -2.525949 | 2.952180  | 6 | -9.992647 | 2.530833  | -0.660912 |
| 6 | 1.879519  | -1.796312 | -0.479056 | 6 | -8.890595 | 2.516263  | 0.164000  |
| 7 | 0.880249  | -1.807841 | 0.461705  | 7 | -7.856238 | 1.920652  | -0.511795 |
| 6 | 1.391273  | -1.418291 | 1.669530  | 6 | -8.289985 | 1.548542  | -1.757928 |
| 6 | 2.726973  | -1.140489 | 1.513723  | 1 | #####     | 1.764290  | -2.758505 |
| 6 | 3.030853  | -1.385066 | 0.150454  | 1 | #####     | 2.962981  | -0.421285 |
| 1 | 1.699651  | -2.080860 | -1.502421 | 1 | -7.636045 | 1.006915  | -2.422017 |
| 1 | 3.405228  | -0.792885 | 2.276541  | 1 | -8.737664 | 2.917966  | 1.152525  |
| 1 | 0.761160  | -1.376199 | 2.542316  | 6 | -1.987211 | 1.671345  | 0.613022  |
| 6 | 4.562876  | -0.587388 | -1.625286 | 6 | -3.027381 | 1.182490  | -0.141586 |
| 7 | 6.170661  | 2.142325  | -0.097337 | 6 | -2.483024 | 0.510482  | -1.265930 |
| 6 | 5.741712  | 2.904384  | -1.150638 | 6 | -1.116808 | 0.606342  | -1.147488 |
| 1 | 3.733925  | 3.565343  | -1.753276 | 7 | -0.820827 | 1.303817  | -0.007695 |
| 1 | 6.453993  | 3.339664  | -1.832144 | 1 | -1.989463 | 2.292815  | 1.492747  |
| 1 | 5.204114  | 1.049681  | 1.466500  | 1 | -0.329819 | 0.180864  | -1.748954 |
| 6 | 8.504061  | 1.507869  | -0.803301 | 1 | -3.023656 | -0.021387 | -2.032481 |
| 6 | 7.515916  | 1.815950  | 0.168757  | 1 | -4.271507 | 0.984904  | 2.274667  |
| 6 | 8.097521  | 1.752345  | 1.412373  | 6 | 1.602856  | 1.707984  | -0.327312 |
| 7 | 9.410757  | 1.414870  | 1.216726  | 6 | 0.469450  | 1.645611  | 0.446662  |
| 6 | 9.664565  | 1.258260  | -0.115406 | 6 | 0.823302  | 2.000773  | 1.775440  |
| 1 | 8.363395  | 1.439243  | -1.869785 | 6 | 2.171398  | 2.268845  | 1.760240  |
| 1 | 10.072465 | 1.229560  | 1.951034  | 7 | 2.639237  | 2.082683  | 0.489106  |
| 1 | 10.630296 | 0.939001  | -0.468896 | 1 | 1.762095  | 1.520175  | -1.375941 |
| 1 | 7.690775  | 1.948197  | 2.390206  | 1 | 2.838352  | 2.591055  | 2.542853  |
| 6 | 3.969362  | 2.266529  | 0.053277  | 1 | 0.174164  | 2.044748  | 2.635046  |
| 6 | 5.091672  | 1.733176  | 0.640539  | 6 | 4.372983  | 3.007555  | -1.087570 |

**HPB<sub>C36σ</sub>..HPB<sub>N16σ</sub>**

|   |           |           |           |   |           |           |          |
|---|-----------|-----------|-----------|---|-----------|-----------|----------|
| 6 | -2.594734 | -0.659075 | -0.673086 | 6 | 1.329883  | -1.320428 | 2.092837 |
| 6 | -1.439846 | -1.373804 | -0.872612 | 6 | 2.618231  | -1.034884 | 1.650917 |
| 6 | -0.247782 | -0.716548 | -1.071176 | 6 | 3.029740  | 0.286539  | 1.512214 |
| 6 | -0.215561 | 0.662431  | -1.069341 | 6 | 2.150808  | 1.322223  | 1.813014 |
| 6 | -1.377728 | 1.373506  | -0.877215 | 6 | 0.862870  | 1.036803  | 2.256724 |
| 6 | -2.562087 | 0.711221  | -0.667302 | 6 | 0.451019  | -0.285318 | 2.395248 |
| 7 | -1.400334 | 2.725583  | -1.095088 | 6 | -0.115192 | 2.053728  | 2.211129 |
| 6 | -2.558376 | 3.488429  | -1.059678 | 6 | -1.528853 | 1.823479  | 2.331875 |
| 6 | -3.813509 | 2.785827  | -0.750783 | 6 | -1.916067 | 0.414945  | 2.487665 |
| 7 | -3.733572 | 1.413486  | -0.588989 | 6 | -0.930924 | -0.566614 | 2.485033 |
| 7 | 0.907727  | 1.317433  | -1.499862 | 6 | 2.437271  | 2.619513  | 1.335647 |
| 6 | 0.928507  | 2.676283  | -1.789340 | 6 | 1.487861  | 3.696568  | 1.299327 |
| 6 | -0.298513 | 3.441910  | -1.525551 | 6 | 0.143289  | 3.349816  | 1.775357 |

|   |           |           |           |   |           |           |           |
|---|-----------|-----------|-----------|---|-----------|-----------|-----------|
| 7 | 0.839870  | -1.421534 | -1.513943 | 6 | 4.180346  | 0.566909  | 0.742796  |
| 6 | 1.987734  | -0.812729 | -1.998656 | 6 | 4.532104  | 1.874202  | 0.262943  |
| 6 | 2.022300  | 0.656424  | -1.995482 | 6 | 3.582625  | 2.937237  | 0.613998  |
| 7 | -1.520134 | -2.727001 | -1.071639 | 6 | 3.368062  | -2.053402 | 1.024173  |
| 6 | -0.469142 | -3.481968 | -1.558037 | 6 | 4.563040  | -1.826554 | 0.260470  |
| 6 | 0.793938  | -2.776789 | -1.814617 | 6 | 4.949967  | -0.416675 | 0.130307  |
| 7 | -3.798463 | -1.305420 | -0.613204 | 6 | 0.813426  | -2.619169 | 1.892653  |
| 6 | -3.930029 | -2.679175 | -0.693437 | 6 | 1.552516  | -3.702455 | 1.304382  |
| 6 | -2.708183 | -3.440180 | -1.002973 | 6 | 2.910990  | -3.356931 | 0.864752  |
| 6 | -4.975096 | 0.816221  | -0.425932 | 6 | -1.504484 | -1.874767 | 2.312439  |
| 6 | -5.005227 | -0.656889 | -0.410075 | 6 | -0.536132 | -2.937152 | 2.006905  |
| 6 | -5.162002 | 3.083250  | -0.638744 | 7 | -3.101075 | -0.281670 | 2.393271  |
| 6 | -5.880224 | 1.865186  | -0.437659 | 6 | -2.873549 | -1.648465 | 2.291691  |
| 6 | -0.760264 | 4.734062  | -1.716671 | 7 | -1.093039 | 3.948957  | 1.712739  |
| 6 | -2.161742 | 4.761633  | -1.431892 | 6 | -2.101914 | 3.050198  | 2.029128  |
| 6 | 2.809093  | 1.642088  | -2.563003 | 7 | 3.384366  | 4.235751  | 0.205601  |
| 6 | 2.132526  | 2.890494  | -2.435378 | 6 | 2.137412  | 4.701282  | 0.597693  |
| 6 | 1.992946  | -3.048096 | -2.448390 | 7 | 5.818157  | 0.279090  | -0.681390 |
| 6 | 2.731845  | -1.833797 | -2.560804 | 6 | 5.586922  | 1.647769  | -0.606927 |
| 6 | -2.381077 | -4.721791 | -1.420313 | 7 | 3.862538  | -3.962264 | 0.077919  |
| 6 | -0.997514 | -4.745564 | -1.768115 | 6 | 4.851556  | -3.062857 | -0.297261 |
| 6 | -5.947753 | -1.670382 | -0.337104 | 7 | -0.623736 | -4.238482 | 1.567615  |
| 6 | -5.282418 | -2.922139 | -0.513914 | 6 | 0.610210  | -4.705666 | 1.141125  |
| 1 | -5.597873 | 4.066310  | -0.716555 | 1 | -4.022439 | 0.127872  | 2.361374  |
| 1 | -6.950251 | 1.772186  | -0.343570 | 1 | -3.711662 | -2.317858 | 2.172523  |
| 1 | -0.169073 | 5.565956  | -2.064931 | 1 | -1.275503 | 4.856849  | 1.313212  |
| 1 | -2.809878 | 5.618555  | -1.526653 | 1 | -3.132401 | 3.363998  | 1.978086  |
| 1 | 3.766107  | 1.481999  | -3.032771 | 1 | 4.027243  | 4.774587  | -0.350432 |
| 1 | 2.482989  | 3.842653  | -2.800996 | 1 | 1.824353  | 5.694767  | 0.320714  |
| 1 | 2.302142  | -4.013128 | -2.817698 | 1 | 6.553984  | -0.130183 | -1.233021 |
| 1 | 3.699730  | -1.720348 | -3.021945 | 1 | 6.181902  | 2.321383  | -1.202031 |
| 1 | -3.070971 | -5.545945 | -1.510677 | 1 | 3.833451  | -4.917159 | -0.238384 |
| 1 | -0.455144 | -5.597831 | -2.145327 | 1 | 5.652029  | -3.389399 | -0.940983 |
| 1 | -7.008607 | -1.533798 | -0.201298 | 1 | -1.483130 | -4.743933 | 1.415513  |
| 1 | -5.755649 | -3.890759 | -0.528930 | 1 | 0.683823  | -5.693777 | 0.717742  |

**$OPN_{C36\sigma}..OPN_{N16\sigma}$**

|   |           |           |           |   |           |           |          |
|---|-----------|-----------|-----------|---|-----------|-----------|----------|
| 6 | -2.446880 | 1.375504  | -1.905848 | 6 | -2.309475 | -0.047791 | 1.647308 |
| 6 | -2.763678 | -0.000169 | -1.790778 | 6 | -1.989058 | -1.404215 | 1.850991 |
| 6 | -1.786085 | -0.976317 | -1.585872 | 6 | -0.680075 | -1.854774 | 1.849781 |
| 6 | -0.387726 | -0.557199 | -1.638064 | 6 | 0.400504  | -0.884869 | 1.687872 |
| 6 | -0.070477 | 0.875715  | -1.607882 | 6 | 0.063160  | 0.556248  | 1.766897 |



|   |           |           |           |   |           |           |          |
|---|-----------|-----------|-----------|---|-----------|-----------|----------|
| 6 | -1.151626 | 1.852790  | -1.685509 | 6 | -1.340558 | 0.944741  | 1.675458 |
| 6 | 0.688375  | -1.527721 | -1.817891 | 6 | 1.789075  | -1.260318 | 1.444639 |
| 6 | 1.970271  | -1.038740 | -2.077751 | 6 | 2.756362  | -0.264656 | 1.420549 |
| 6 | 2.295176  | 0.327401  | -1.892035 | 6 | 2.457661  | 1.069503  | 1.758790 |
| 6 | 1.332107  | 1.290271  | -1.588275 | 6 | 1.154471  | 1.513319  | 1.916143 |
| 6 | 1.901238  | 2.600999  | -1.238348 | 7 | 1.059431  | 2.886691  | 2.300527 |
| 6 | -1.071137 | 3.319537  | -1.605038 | 7 | -1.873055 | 2.262913  | 1.552965 |
| 6 | -3.544291 | 2.255124  | -2.180771 | 7 | -3.656644 | 0.240581  | 1.460481 |
| 6 | -4.157036 | -0.330857 | -1.838039 | 7 | -3.065429 | -2.257027 | 2.094900 |
| 6 | -2.335326 | -2.308024 | -1.286396 | 7 | -0.561329 | -3.253839 | 2.115867 |
| 6 | 0.614582  | -2.995216 | -1.809041 | 7 | 2.299394  | -2.562448 | 1.158633 |
| 6 | 3.045218  | -1.895508 | -2.480368 | 7 | 4.083742  | -0.533177 | 1.098485 |
| 6 | 3.685939  | 0.656986  | -1.985846 | 7 | 3.552087  | 1.911966  | 1.955347 |
| 6 | -0.065594 | 4.156654  | -1.148829 | 6 | -1.302299 | 3.490216  | 1.797318 |
| 7 | -0.512736 | 5.443300  | -1.190600 | 6 | -2.199318 | 4.486960  | 1.480421 |
| 6 | -1.796874 | 5.501290  | -1.660011 | 6 | -3.389523 | 3.877242  | 1.058994 |
| 6 | -2.179596 | 4.205956  | -1.918604 | 6 | -3.185963 | 2.525101  | 1.126147 |
| 6 | -3.432638 | 3.621094  | -2.250659 | 6 | -4.128845 | 1.470587  | 1.082867 |
| 7 | -4.682932 | 4.130354  | -2.471918 | 6 | -5.497413 | 1.390232  | 0.944591 |
| 6 | -5.607382 | 3.098326  | -2.534677 | 6 | -5.872030 | 0.063092  | 1.261181 |
| 6 | -4.927611 | 1.915220  | -2.343948 | 6 | -4.727377 | -0.630936 | 1.579795 |
| 6 | -5.207879 | 0.523377  | -2.136704 | 6 | -4.413425 | -1.948792 | 2.009309 |
| 7 | -6.354923 | -0.209040 | -2.032380 | 6 | -5.124753 | -3.042639 | 2.452762 |
| 6 | -6.071162 | -1.507378 | -1.651300 | 6 | -4.188634 | -4.040730 | 2.830730 |
| 6 | -4.699169 | -1.598351 | -1.517014 | 6 | -2.930965 | -3.523570 | 2.605167 |
| 6 | -3.709099 | -2.553462 | -1.151551 | 6 | -1.607147 | -4.024178 | 2.650888 |
| 7 | -3.895359 | -3.829043 | -0.697817 | 6 | -1.150286 | -5.284811 | 2.935070 |
| 6 | -2.677949 | -4.442388 | -0.560015 | 6 | 0.198123  | -5.325608 | 2.541672 |
| 6 | -1.709547 | -3.555372 | -0.962523 | 6 | 0.522129  | -4.091935 | 2.015490 |
| 6 | -0.357242 | -3.857263 | -1.327821 | 6 | 1.732043  | -3.807073 | 1.324342 |
| 7 | 0.086922  | -5.139338 | -1.469235 | 6 | 2.600100  | -4.772554 | 0.864545 |
| 6 | 1.329653  | -5.167361 | -2.036935 | 6 | 3.773562  | -4.132354 | 0.437987 |
| 6 | 1.696644  | -3.859099 | -2.250191 | 6 | 3.584647  | -2.790991 | 0.638982 |
| 6 | 2.923418  | -3.253636 | -2.637741 | 6 | 4.527163  | -1.736746 | 0.617182 |
| 7 | 4.150631  | -3.742645 | -2.988257 | 6 | 5.880206  | -1.642328 | 0.374786 |
| 6 | 5.073461  | -2.708262 | -3.037573 | 6 | 6.274202  | -0.328199 | 0.722017 |
| 6 | 4.414514  | -1.542380 | -2.715300 | 6 | 5.156572  | 0.341364  | 1.164450 |
| 6 | 4.712994  | -0.170325 | -2.417423 | 6 | 4.881307  | 1.633900  | 1.686557 |
| 7 | 5.862003  | 0.563593  | -2.352382 | 6 | 5.629166  | 2.719123  | 2.088596 |
| 6 | 5.608384  | 1.825197  | -1.852054 | 6 | 4.736420  | 3.678966  | 2.632505 |
| 6 | 4.249172  | 1.900445  | -1.612518 | 6 | 3.466870  | 3.149064  | 2.539549 |
| 6 | 3.281573  | 2.832285  | -1.140351 | 6 | 2.155274  | 3.627189  | 2.772165 |

|   |           |           |           |   |           |           |           |
|---|-----------|-----------|-----------|---|-----------|-----------|-----------|
| 7 | 3.493039  | 4.082940  | -0.633070 | 6 | 1.730736  | 4.854650  | 3.209182  |
| 6 | 2.284489  | 4.698629  | -0.429150 | 6 | 0.347674  | 4.911286  | 2.972668  |
| 6 | 1.296998  | 3.836780  | -0.843214 | 6 | -0.030049 | 3.720209  | 2.387730  |
| 1 | 6.101001  | -2.902290 | -3.296764 | 1 | 7.264495  | 0.094696  | 0.662561  |
| 1 | 4.362653  | -4.707113 | -3.179392 | 1 | 6.503689  | -2.437459 | -0.000244 |
| 1 | 6.781603  | 0.211565  | -2.560340 | 1 | 6.703230  | 2.789663  | 2.025441  |
| 1 | 6.404927  | 2.537268  | -1.716354 | 1 | 4.985428  | 4.643953  | 3.043472  |
| 1 | 4.378416  | 4.395668  | -0.266133 | 1 | 2.370218  | 5.621085  | 3.616637  |
| 1 | 2.226264  | 5.694044  | -0.018707 | 1 | -0.324367 | 5.725763  | 3.187030  |
| 1 | 0.062859  | 6.240704  | -0.976448 | 1 | -1.987582 | 5.541608  | 1.539904  |
| 1 | -2.330177 | 6.433577  | -1.738599 | 1 | -4.312439 | 4.345405  | 0.755214  |
| 1 | -4.904323 | 5.103406  | -2.598469 | 1 | -6.143035 | 2.203404  | 0.654594  |
| 1 | -6.649646 | 3.305973  | -2.711266 | 1 | -6.865941 | -0.354418 | 1.251405  |
| 1 | -7.283213 | 0.145770  | -2.190578 | 1 | -6.199383 | -3.094789 | 2.525397  |
| 1 | -6.859119 | -2.230290 | -1.523103 | 1 | -4.402802 | -5.022344 | 3.221301  |
| 1 | -4.761276 | -4.165210 | -0.307471 | 1 | -1.748664 | -6.080845 | 3.348167  |
| 1 | -2.599481 | -5.454484 | -0.195374 | 1 | 0.880332  | -6.156101 | 2.617673  |
| 1 | -0.465833 | -5.949998 | -1.244675 | 1 | 2.386674  | -5.828571 | 0.855107  |
| 1 | 1.862252  | -6.090900 | -2.189540 | 1 | 4.678726  | -4.574069 | 0.053406  |
